# Supplementary material for: Efficient access to polysubstituted tetrahydrofurans by electrophilic cyclization of vinylsilyl alcohols
Source: Royal Society of Chemistry journal article supplement (doi:10.1039/c5ra06640a), 2015-01-01

## Supporting Information

### Efficient access to polisubstituted tetrahydrofurans by electrophilic cyclization of vinylsilyl alcohols

Asunción Barbero,<sup>\*,†</sup> Héctor Barbero,<sup>‡</sup> Alfonso González-Ortega,<sup>†</sup> Francisco J. Pulido,<sup>†</sup> Patricia Val,<sup>†</sup> Alberto Diez-Varga<sup>†</sup> and Joaquín R. Morán.<sup>†</sup>

<sup>†</sup>Department of Organic Chemistry, University of Valladolid, Campus Miguel Delibes, 47011 Valladolid

<sup>‡</sup>Department of Chemical Physics and Inorganic Chemistry, Campus Miguel Delibes, 47011 Valladolid

<sup>†</sup>Department of Organic Chemistry, University of Salamanca, Plaza de los Caídos, 1-5, E-37008, Salamanca, Spain.

#### Table of Contents

|                                                                            |    |
|----------------------------------------------------------------------------|----|
| Computational Details                                                      | S1 |
| Copies of <sup>1</sup> H and <sup>13</sup> C spectra for all new compounds | S3 |

#### Computational Details

DFT calculations were carried out by using the GAUSSIAN09 package.<sup>S1</sup> B3LYP method (Becke Three Parameter Hybrid Functionals) was applied.<sup>S2</sup> A split-valence double-zeta basis set with polarization functions 6-31G(d,p) was used for all atoms.<sup>S3</sup> Geometry full optimizations were performed in gas-phase without symmetry restrictions, and they were confirmed as minima by vibrational analysis.<sup>S4</sup> Solvent effects were taken into account by using PCM algorithm with dichloromethane ( $\epsilon = 8.93$ ) as a solvent<sup>S5</sup> and added to Gibbs free energies previously computed in gas phase, by following the equation:

$$G_{\text{toluene}} = G_{\text{gas}} + (E_{\text{toluene}} - E_{\text{gas}}) \quad \text{eq. S1}$$

Transition States were obtained by first scanning the Potential Energy Surface along the bond that will be formed and then applying the synchronous transit-guided quasi-Newton method QST3 at the approximate geometry of the TS.<sup>S6</sup> Once located, they were confirmed by vibrational analysis.

*p*-Toluene sulfonic acid and *p*-toluene sulfonate anion were also subjected to the shown procedure and their energy summed to the suitable molecule in order to keep molecular charges offset and compare energies with different number of atoms.

**Table S1.** Relative Gibbs free energies in solution for all stationary points in pathways **a** and **b**.

| Stationary Point | $\Delta G$ (kcal/mol) |
|------------------|-----------------------|
| II               | 0.00                  |
| I                | 1.46                  |

|             |        |
|-------------|--------|
| <b>TSII</b> | 2.22   |
| <b>TSI</b>  | 6.76   |
| <b>IV</b>   | -4.92  |
| <b>II</b>   | -4.65  |
| <b>4b</b>   | -36.82 |
| <b>5b</b>   | -33.32 |

**Table S2.** Relative Gibbs free energies in solution for all stationary points in pathways **c** and **d**.

| <b>Stationary Point</b> | <b><math>\Delta G</math> (kcal/mol)</b> |
|-------------------------|-----------------------------------------|
| <b>VI</b>               | 0.00                                    |
| <b>V</b>                | 1.08                                    |
| <b>TSIV</b>             | 3.15                                    |
| <b>TSIII</b>            | 4.26                                    |
| <b>VIII</b>             | -6.89                                   |
| <b>VII</b>              | -5.46                                   |
| <b>4e</b>               | -34.23                                  |
| <b>5e</b>               | -33.99                                  |

**Table S3.** Relative Gibbs free energies in solution for all stationary points in pathways **e** and **f**.

| <b>Stationary Point</b> | <b><math>\Delta G</math> (kcal/mol)</b> |
|-------------------------|-----------------------------------------|
| <b>X</b>                | 0.00                                    |
| <b>IX</b>               | 4.66                                    |
| <b>TSVI</b>             | 3.04                                    |
| <b>TSV</b>              | 12.26                                   |
| <b>XII</b>              | -5.79                                   |
| <b>XI</b>               | -0.76                                   |
| <b>4h</b>               | -34.64                                  |
| <b>5h</b>               | -33.74                                  |

(S1) Gaussian 09, Revision **D.01**, M. J. Frisch, G. W. Trucks, H. B. Schlegel, G. E. Scuseria, M. A. Robb, J. R. Cheeseman, G. Scalmani, V. Barone, B. Mennucci, G. A. Petersson, H. Nakatsuji, M. Caricato, X. Li, H. P. Hratchian, A. F. Izmaylov, J. Bloino, G. Zheng, J. L. Sonnenberg, M. Hada, M. Ehara, K. Toyota, R. Fukuda, J. Hasegawa, M. Ishida, T. Nakajima, Y. Honda, O. Kitao, H. Nakai, T. Vreven, J. A., Jr. Montgomery, J. E. Peralta, F. Ogliaro, M. Bearpark, J. J. Heyd, E. Brothers, K. N. Kudin, V. N. Staroverov, R. Kobayashi, J. Normand, K. Raghavachari, A. Rendell, J. C. Burant, S. S. Iyengar, J. Tomasi, M. Cossi, N. Rega, M. J. Millam, M. Klene, J. E. Knox, J. B. Cross, V. Bakken, C. Adamo, J. Jaramillo, R. Gomperts, R. E. Stratmann, O. Yazyev, A. J. Austin, R. Cammi, C. Pomelli, J. W. Ochterski, R. L. Martin,

- 
- K. Morokuma, V. G. Zakrzewski, G. A. Voth, P. Salvador, J. J. Dannenberg, S. Dapprich, A. D. Daniels, Ö. Farkas, J. B. Foresman, J. V. Ortiz, J. Cioslowski, D. J. Fox, Gaussian, Inc., Wallingford CT, 2009.
- (S2) a) A. D. J. Becke, *Chem. Phys.*, 1993, **98**, 5648. b) C. Lee, W. Yang, R. G. Parr, *Phys. Rev. B*, 1988, **37**, 785-789.
- (S3) a) A. Sygula, C. Muck-Lichtenfeld, S. Grimme, L. Kobryn, *Phys. Chem. Chem. Phys.*, 2010, **12**, (26), 7091-7097. b) J. R. Otero, D. Josa, Cabaleiro, E. M. Lago, *Phys. Chem. Chem. Phys.*, 2011, **13**, (47), 21139-21145. c) A. Sygula, S. Saebo, T. Janowski, P. Pulay, A. A. Sasith Karunarathna, *Chem. Phys. Lett.*, 2011, **512**, (4-6), 155-160. d) J. Rodríguez-Otero, D. Josa, E. M. Cabaleiro-Lago, M. Rellán-Piñeiro, *Chem. Phys. Lett.*, 2013, **557**, 170-175. e) J. Rodríguez-Otero, D. Josa, E. M. Cabaleiro-Lago, L. A. Santos, T. C. Ramalho, *J. Phys. Chem. A*, 2014, **118**, (40), 9521-9528.
- (S4) a) R. Ditchfield, W. J. Hehre, J. A. Pople, *J. Chem. Phys.*, 1971, **54**, 724. b) W. J. Hehre, R. Ditchfield, J. A. Pople, *J. Chem. Phys.*, 1972, **56**, 2257. c) P. C. Hariharan, J. A. Pople, *Theor. Chem. Acc.*, 1973, **28**, 213-222. d) P. C. Hariharan, J. A. Pople, *Mol. Phys.*, 1974, **27**, 209-214. e) M. S. Gordon, *Chem. Phys. Lett.*, 1980, **76**, 163-168. f) M. M. Francl, W. J. Pietro, W. J. Hehre, J. S. Binkley, D. J. DeFrees, J. A. Pople, M. S. Gordon, *J. Chem. Phys.*, 1982, **77**, 3654-3665. g) R. C. Binning Jr., L. A. Curtiss, *J. Comp. Chem.*, 1990, **11**, 1206-1216. h) J.-P. Blaudeau, M. P. McGrath, L. A. Curtiss, L. Radom, *J. Chem. Phys.*, 1997, **107**, 5016-5021. i) V. A. Rassolov, J. A. Pople, M. A. Ratner, T. L. Windus, *J. Chem. Phys.*, 1998, **109**, 1223-1229. j) V. A. Rassolov, M. A. Ratner, J. A. Pople, P. C. Redfern, L. A. Curtiss, *J. Comp. Chem.*, 2001, **22**, 976-984.
- (S5) J. Tomasi, B. Mennucci, R. Cammi, *Chem. Rev.*, 2005, **105**, 2999-3093.
- (S6) a) C. Peng, H. B. Schlegel, *Israel J. of Chem.*, 1993, **33**, 449. b) C. Peng, P. Y. Ayala, H. B. Schlegel, M. J. Frisch, *J. Comp. Chem.*, 1996, **17**, 49.

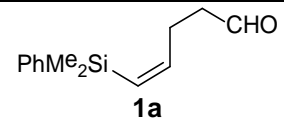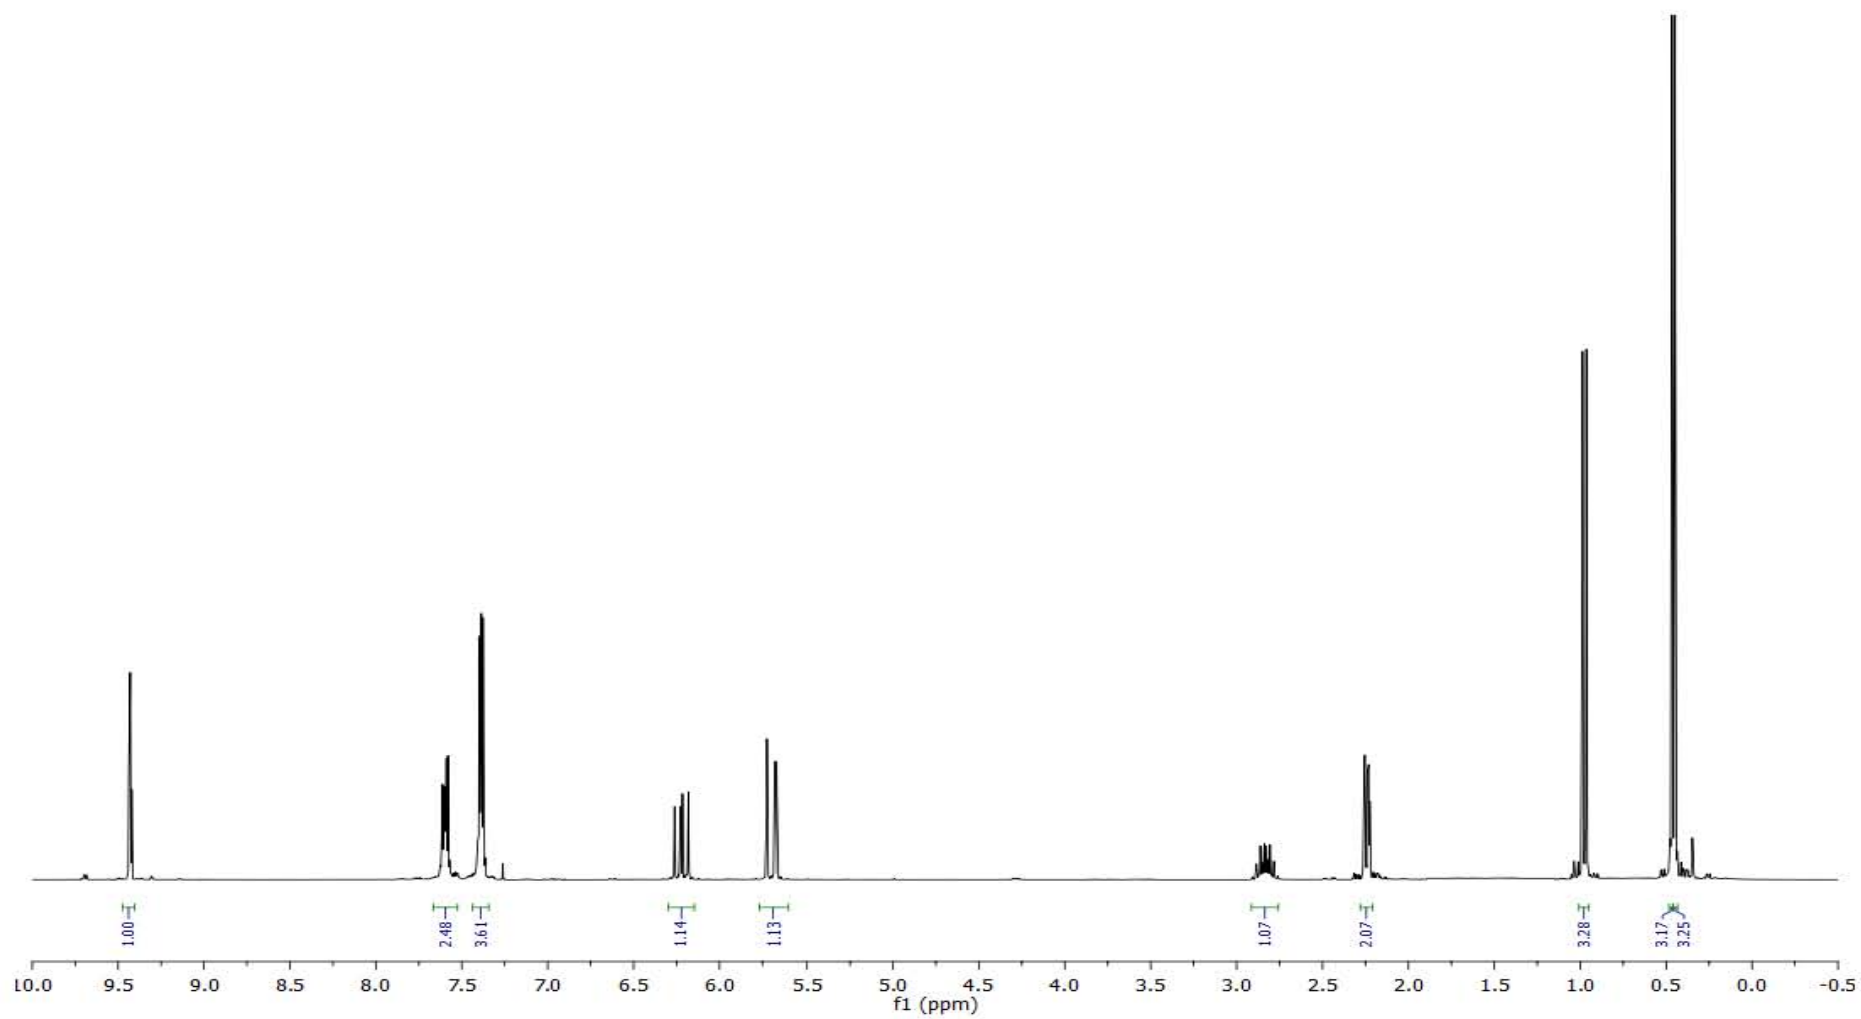

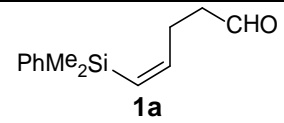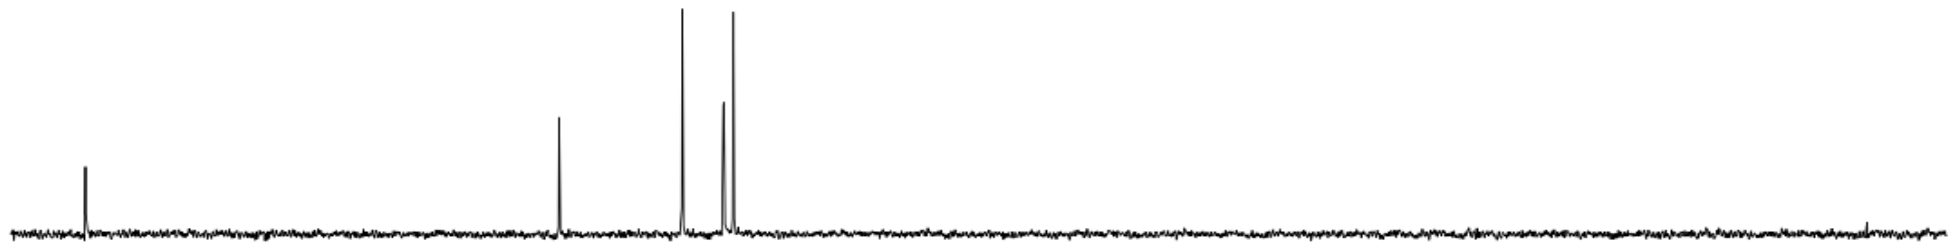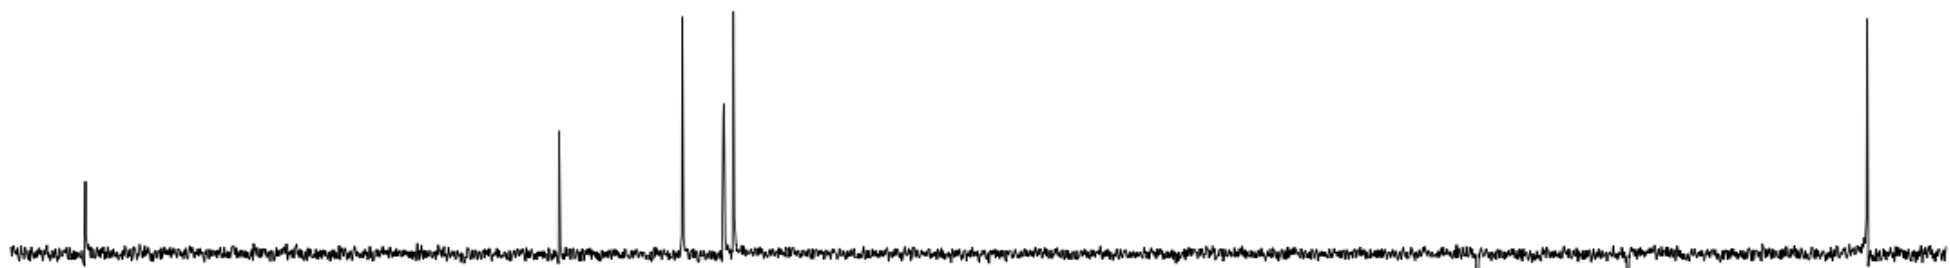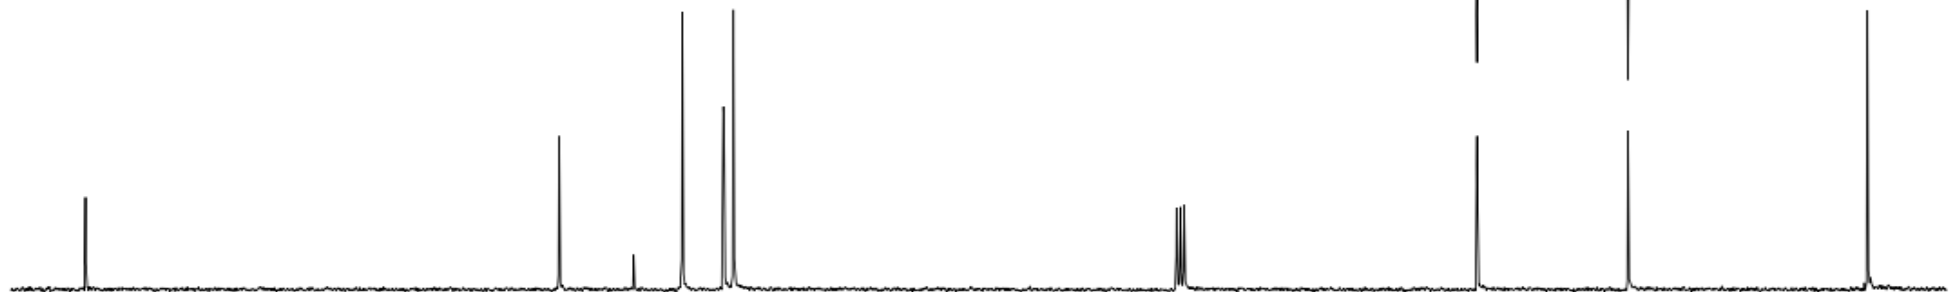

210 200 190 180 170 160 150 140 130 120 110 100 90 80 70 60 50 40 30 20 10 0 -10  
f1 (ppm)

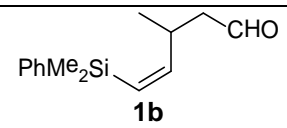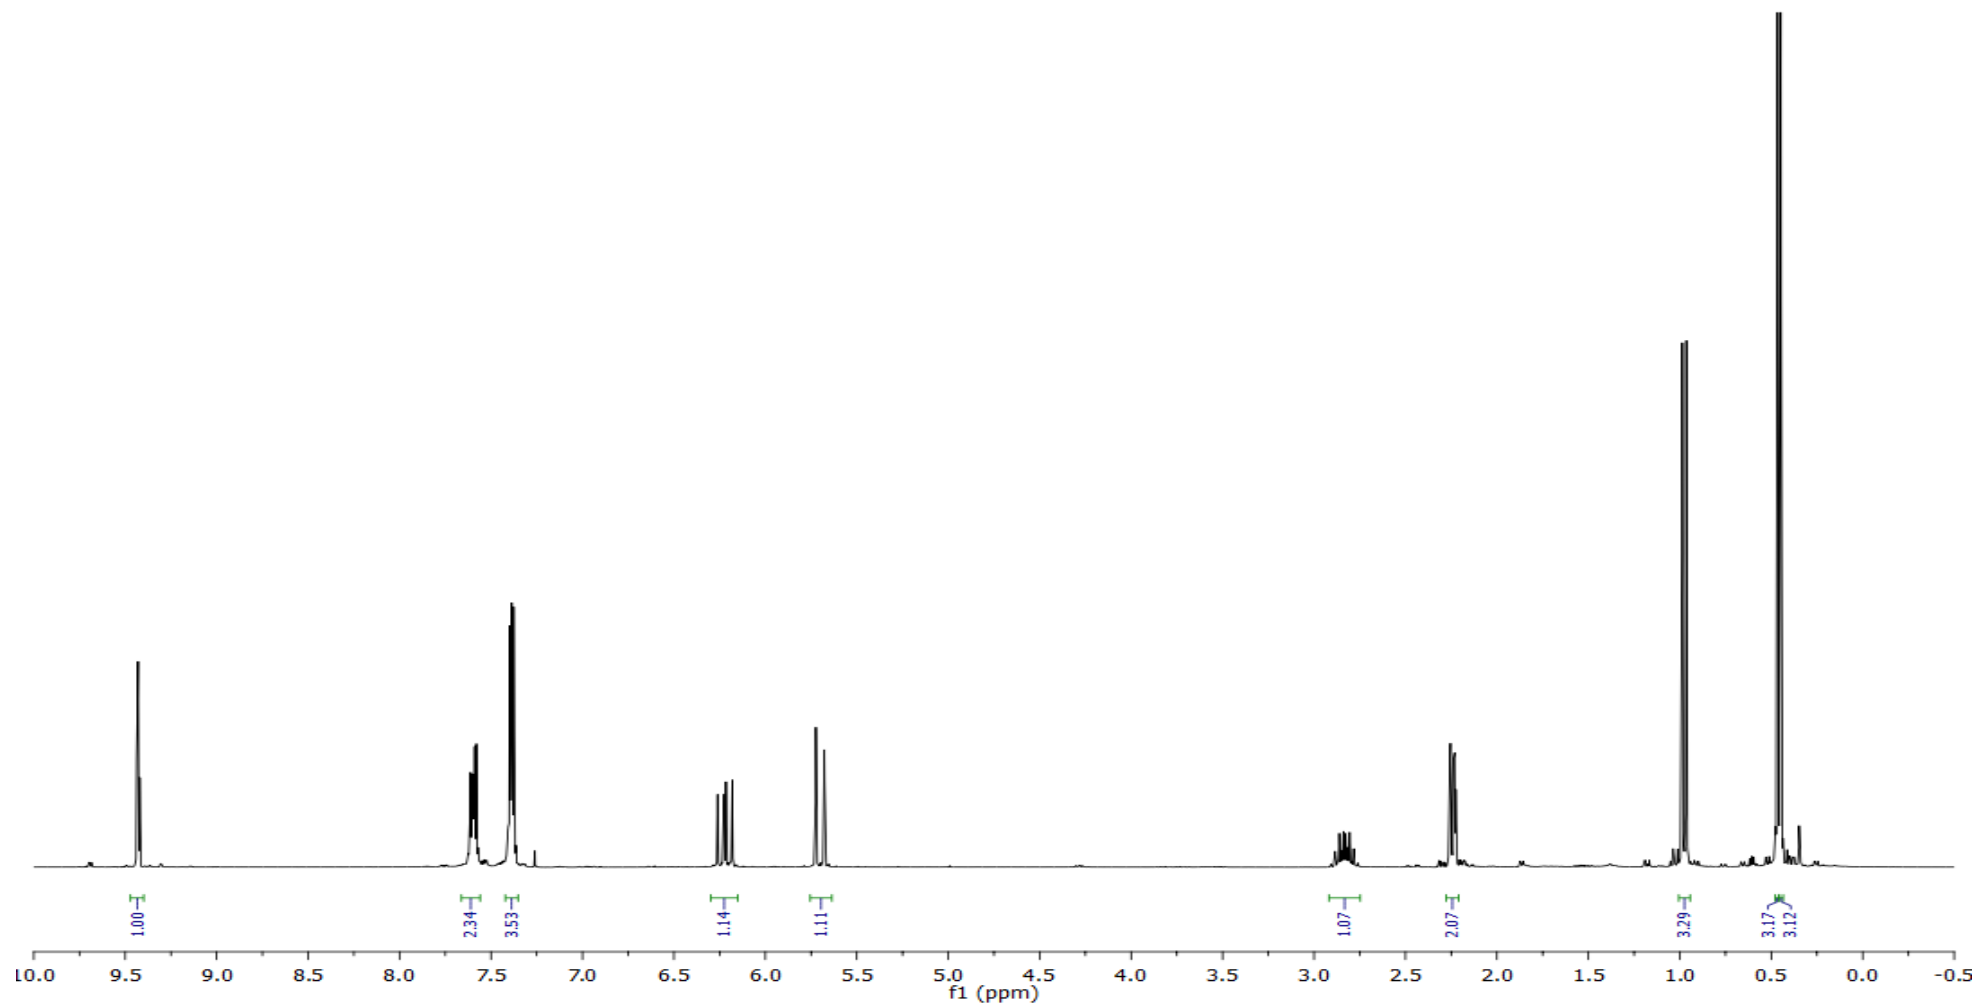

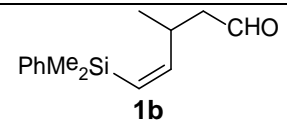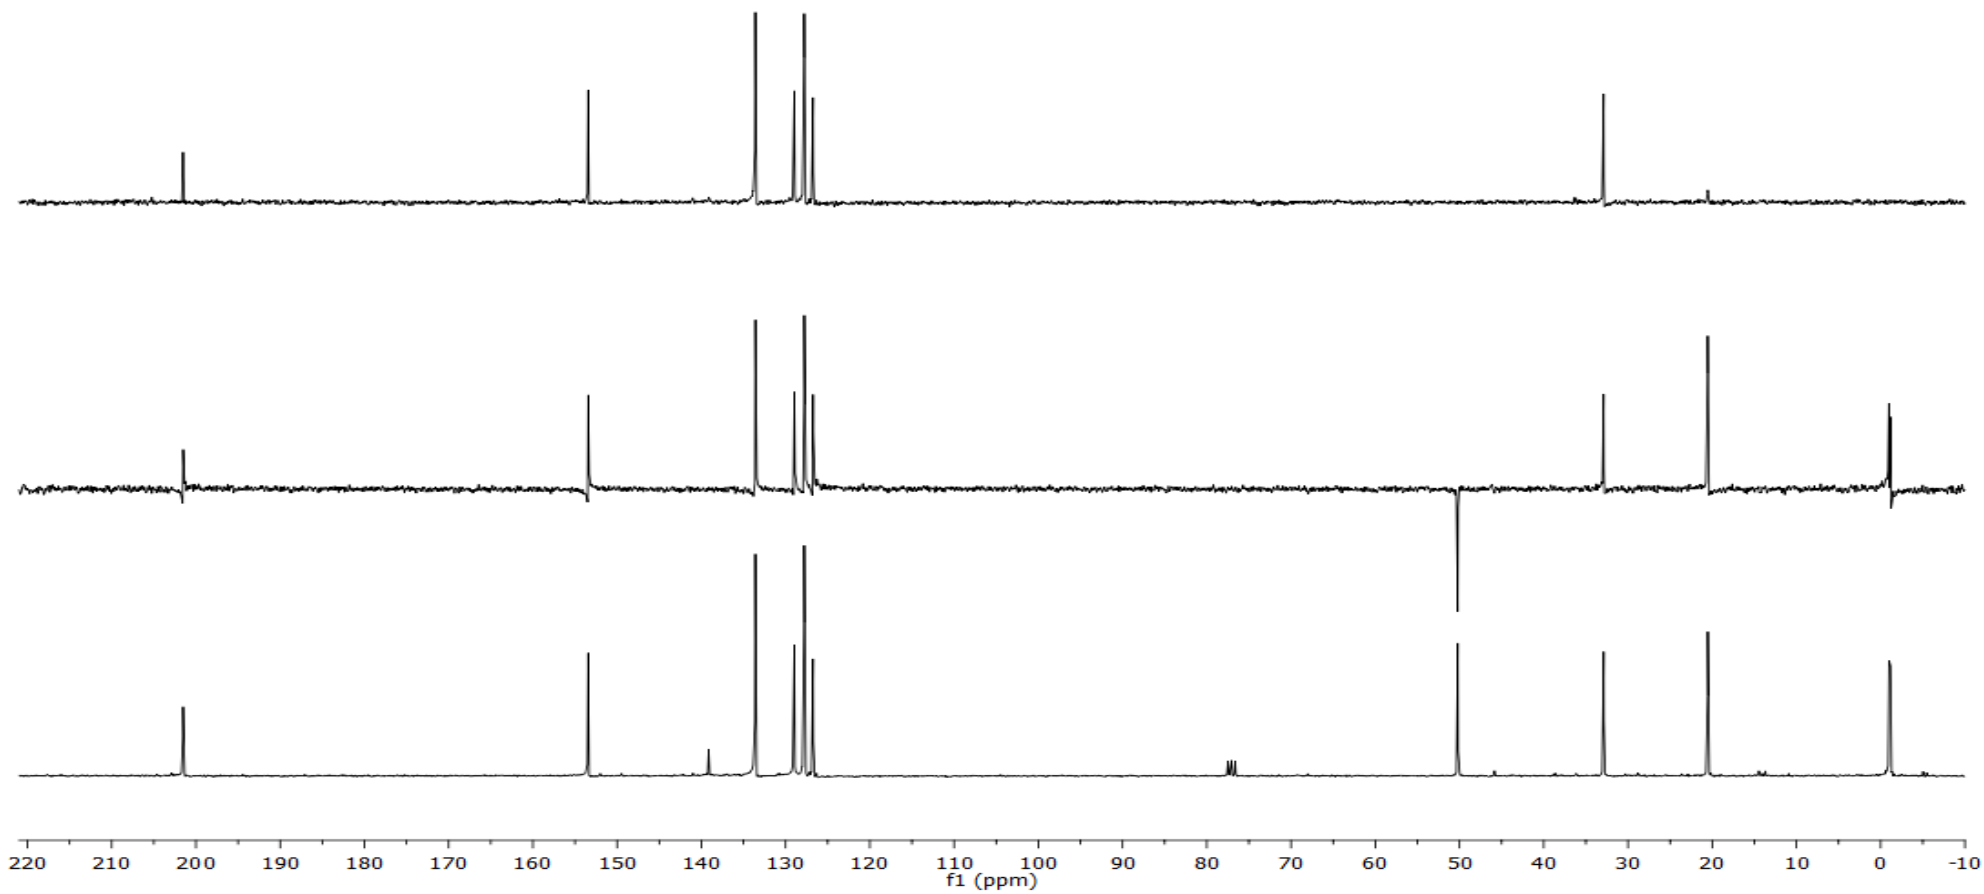

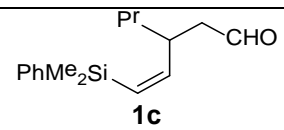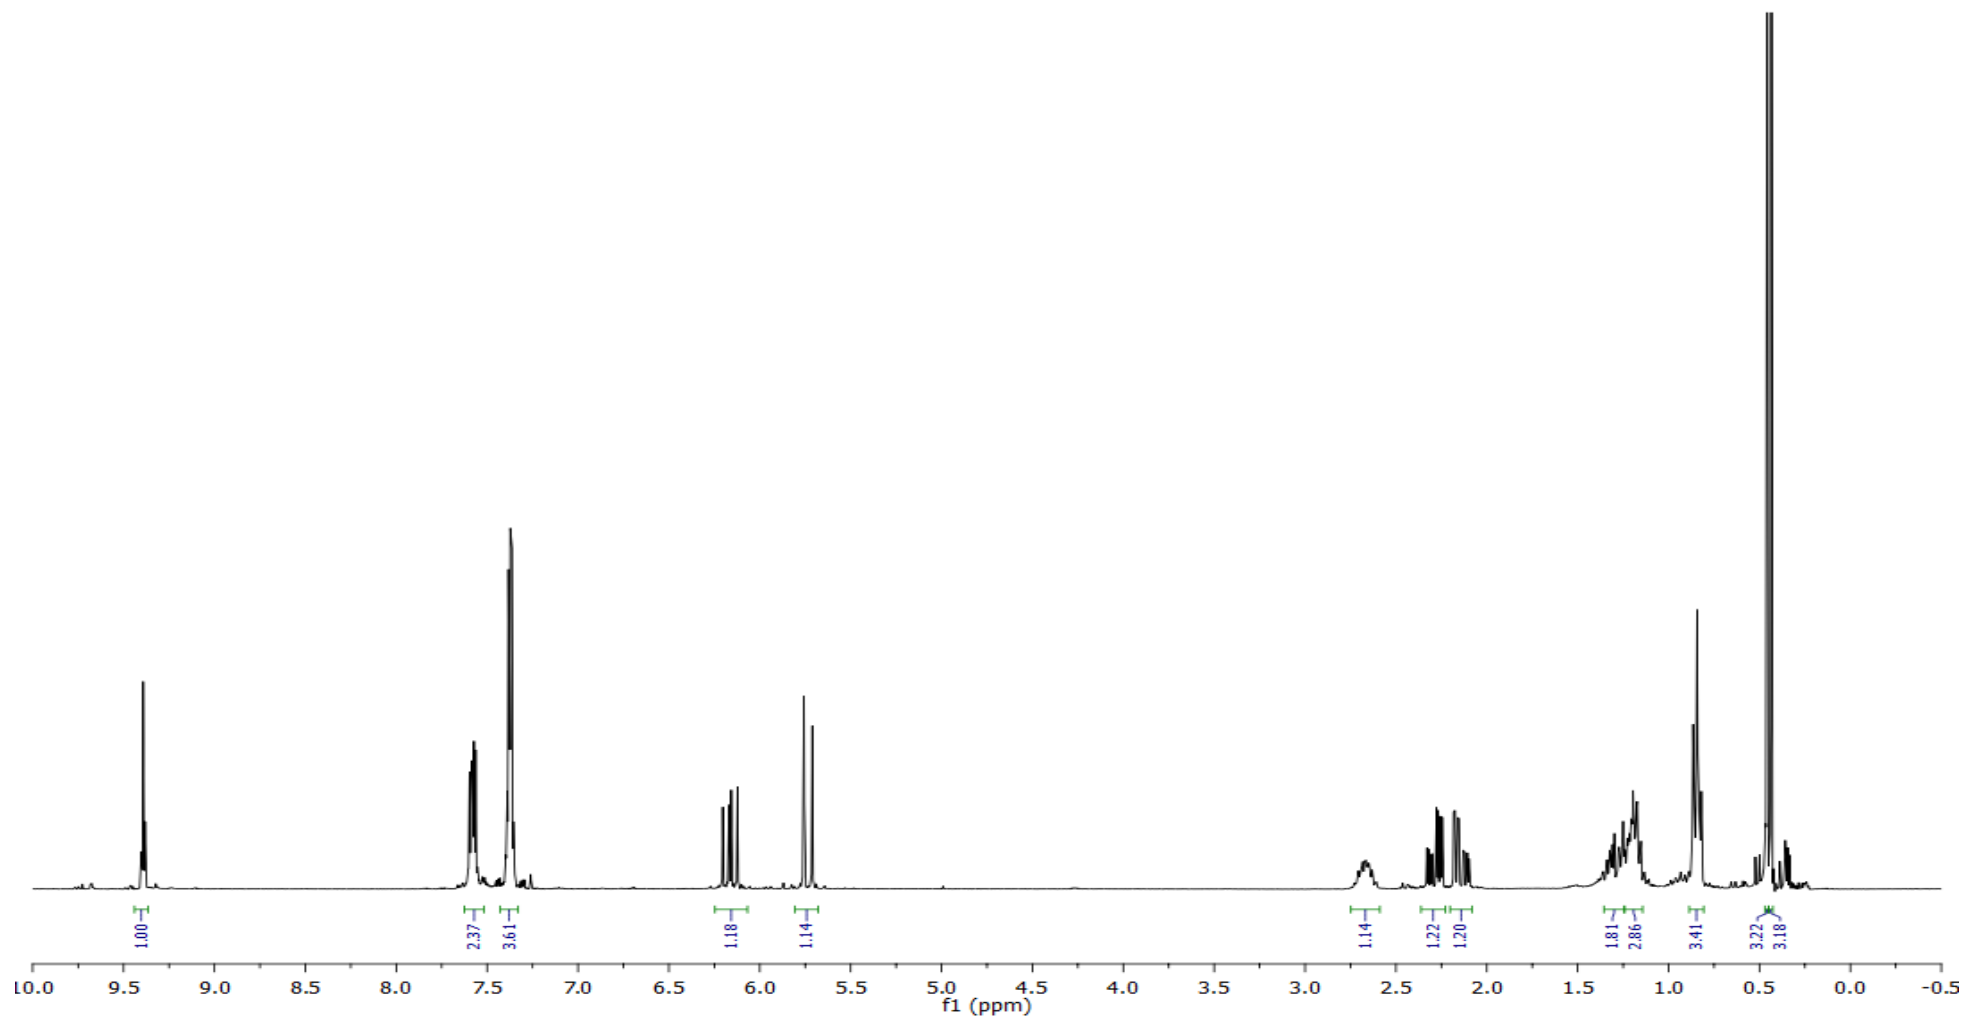



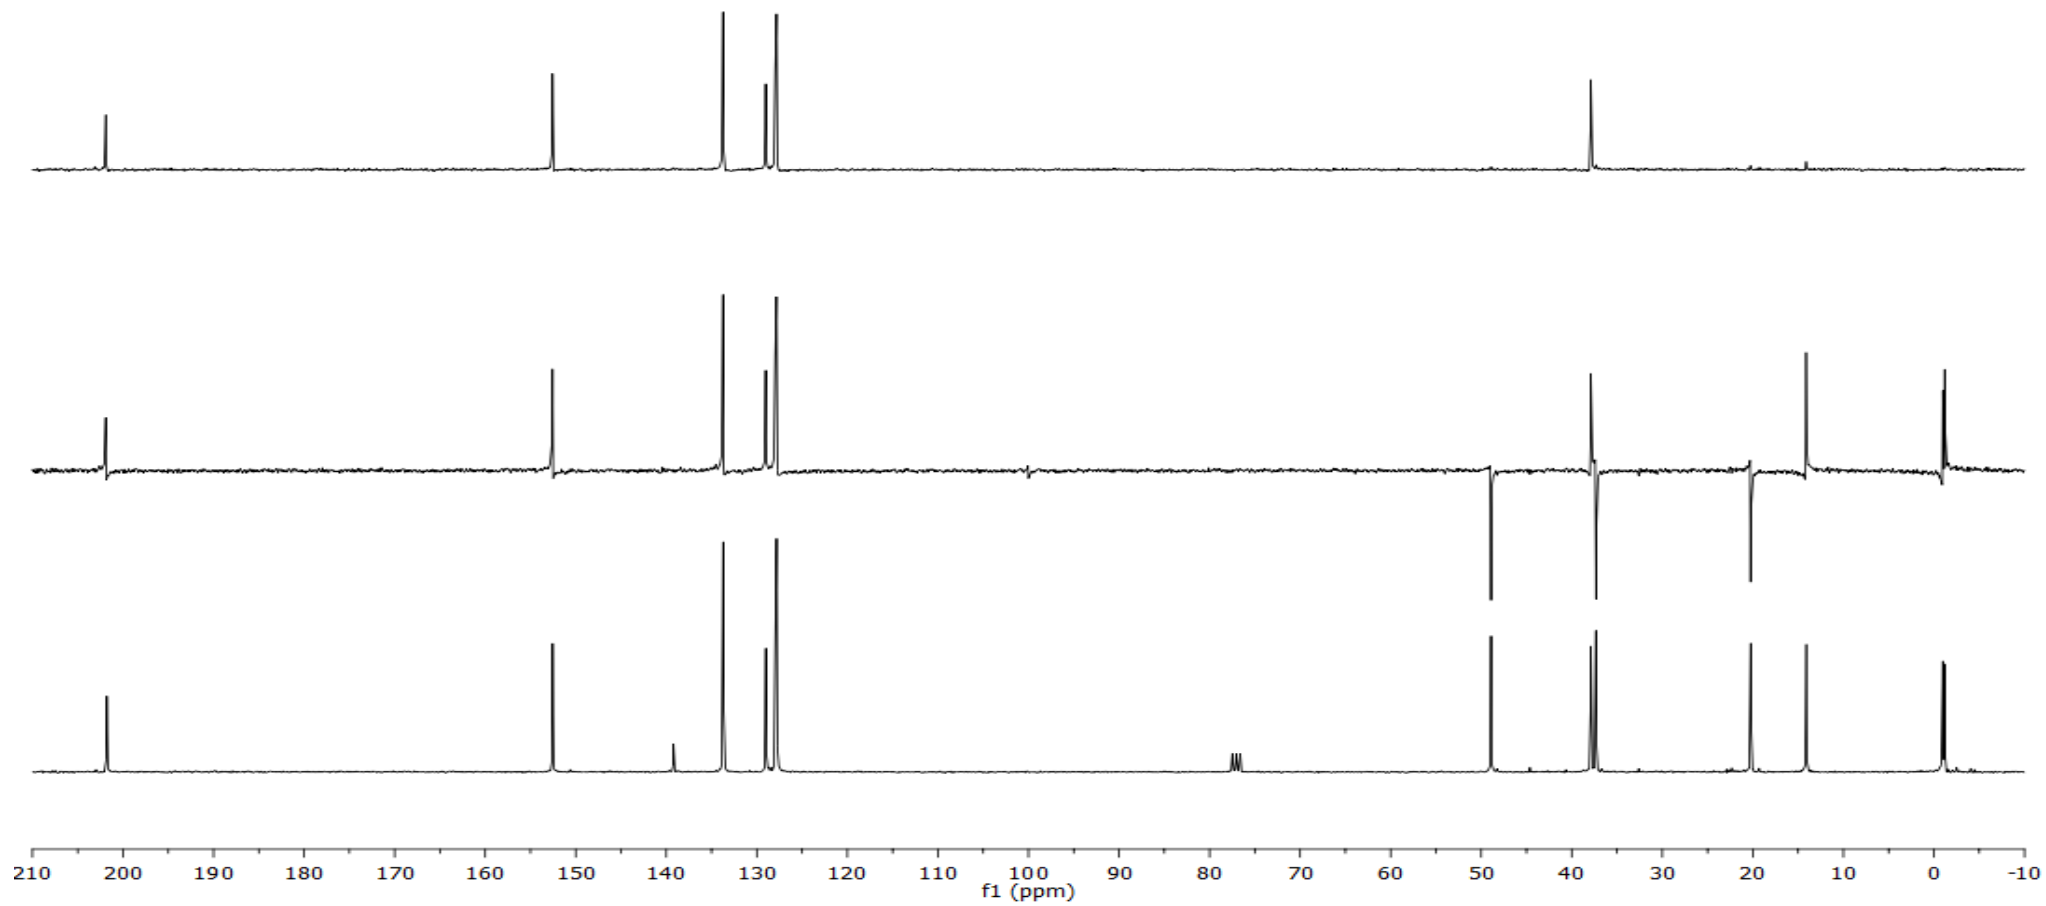

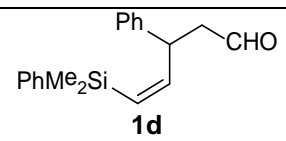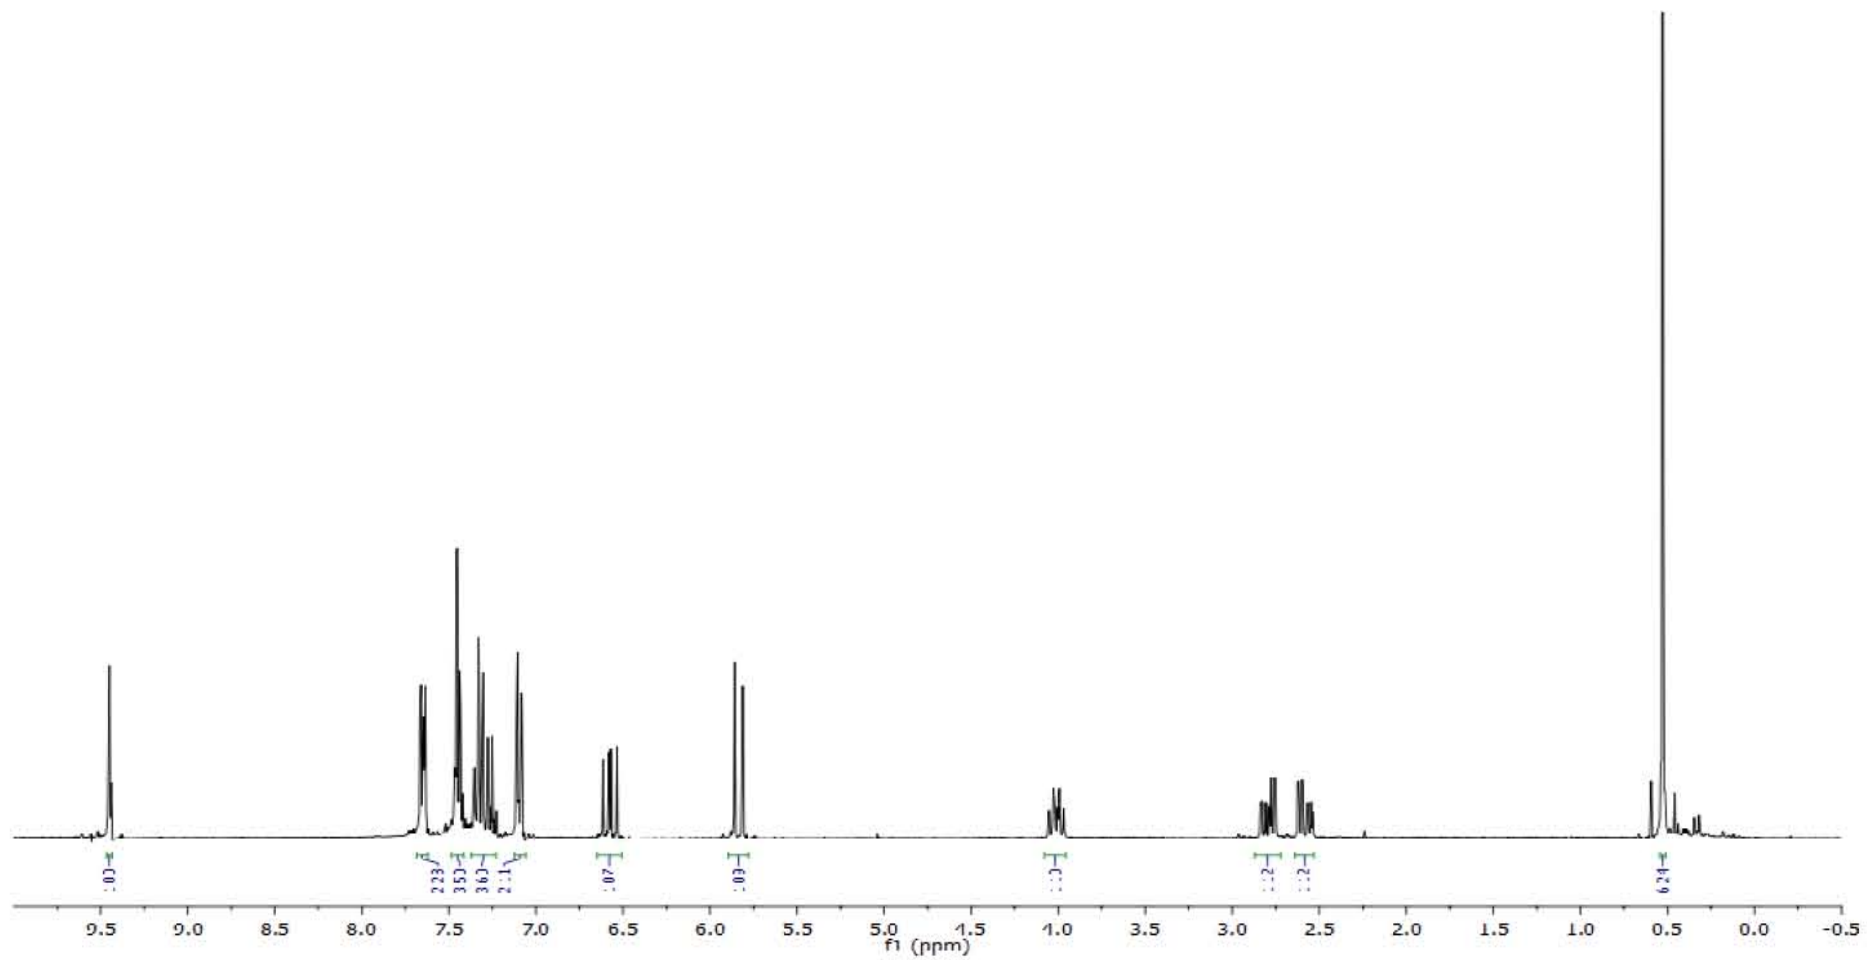

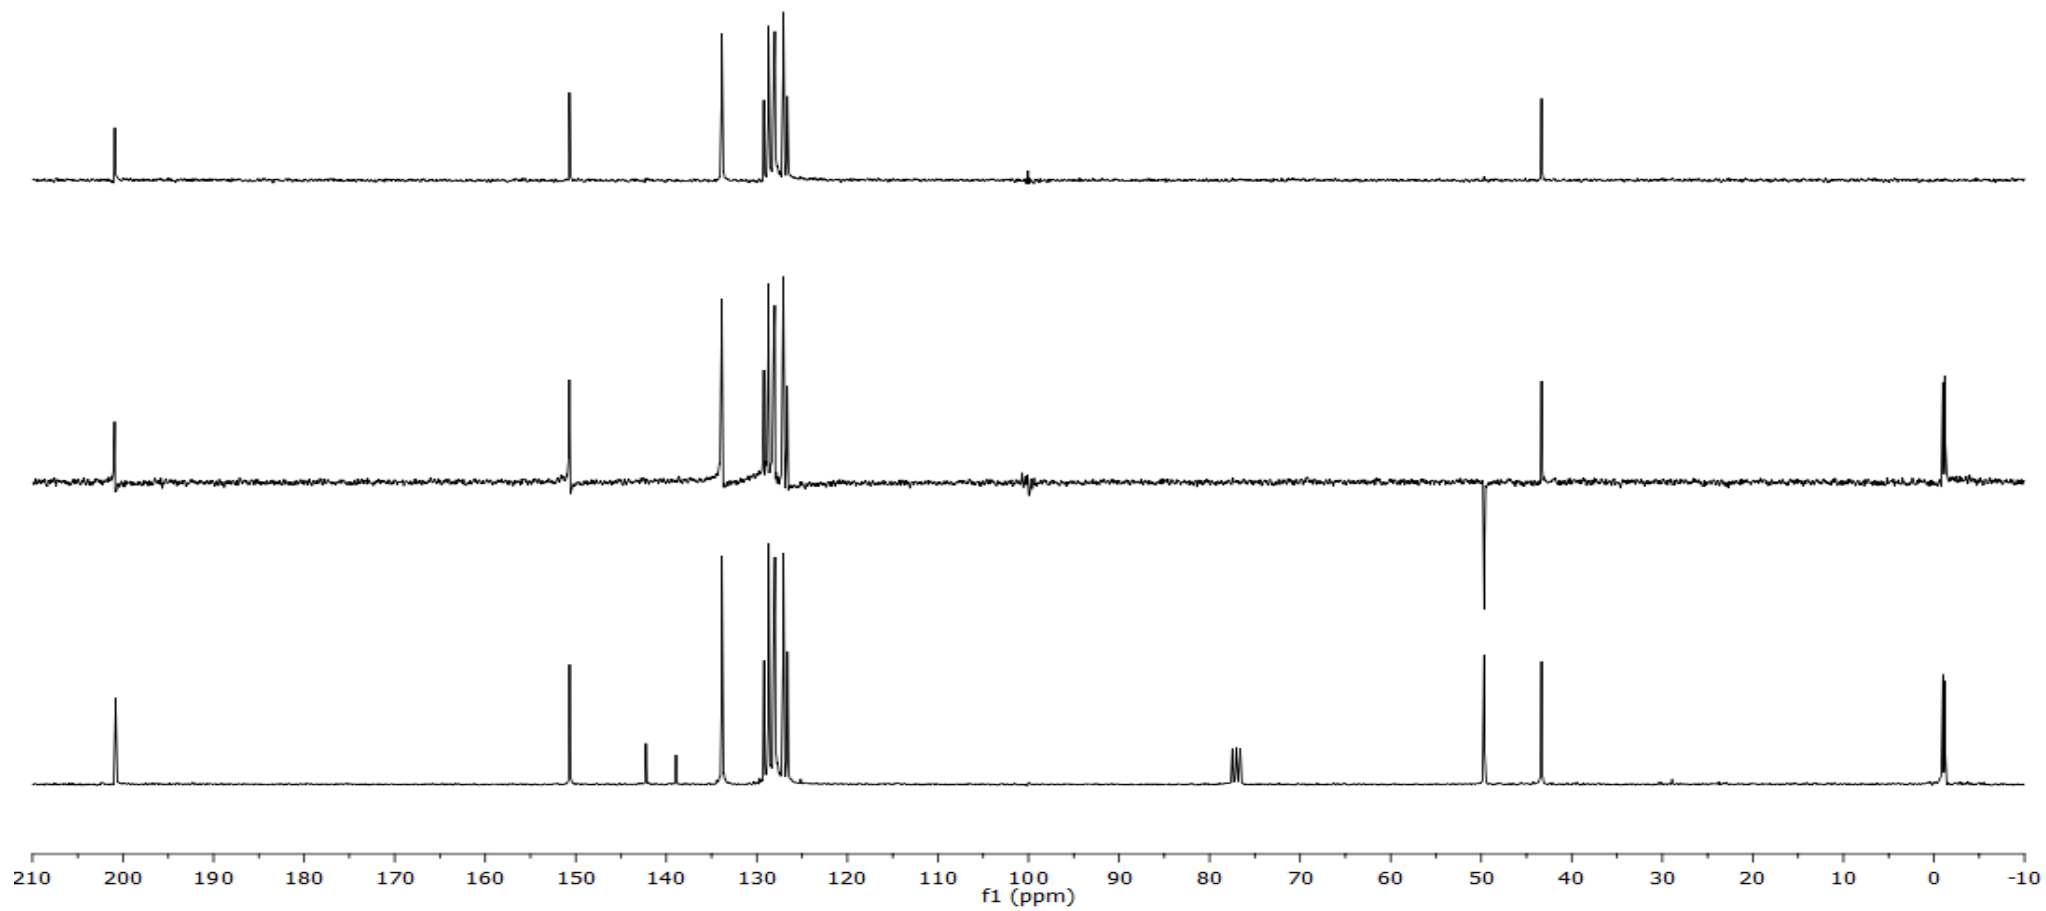

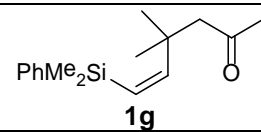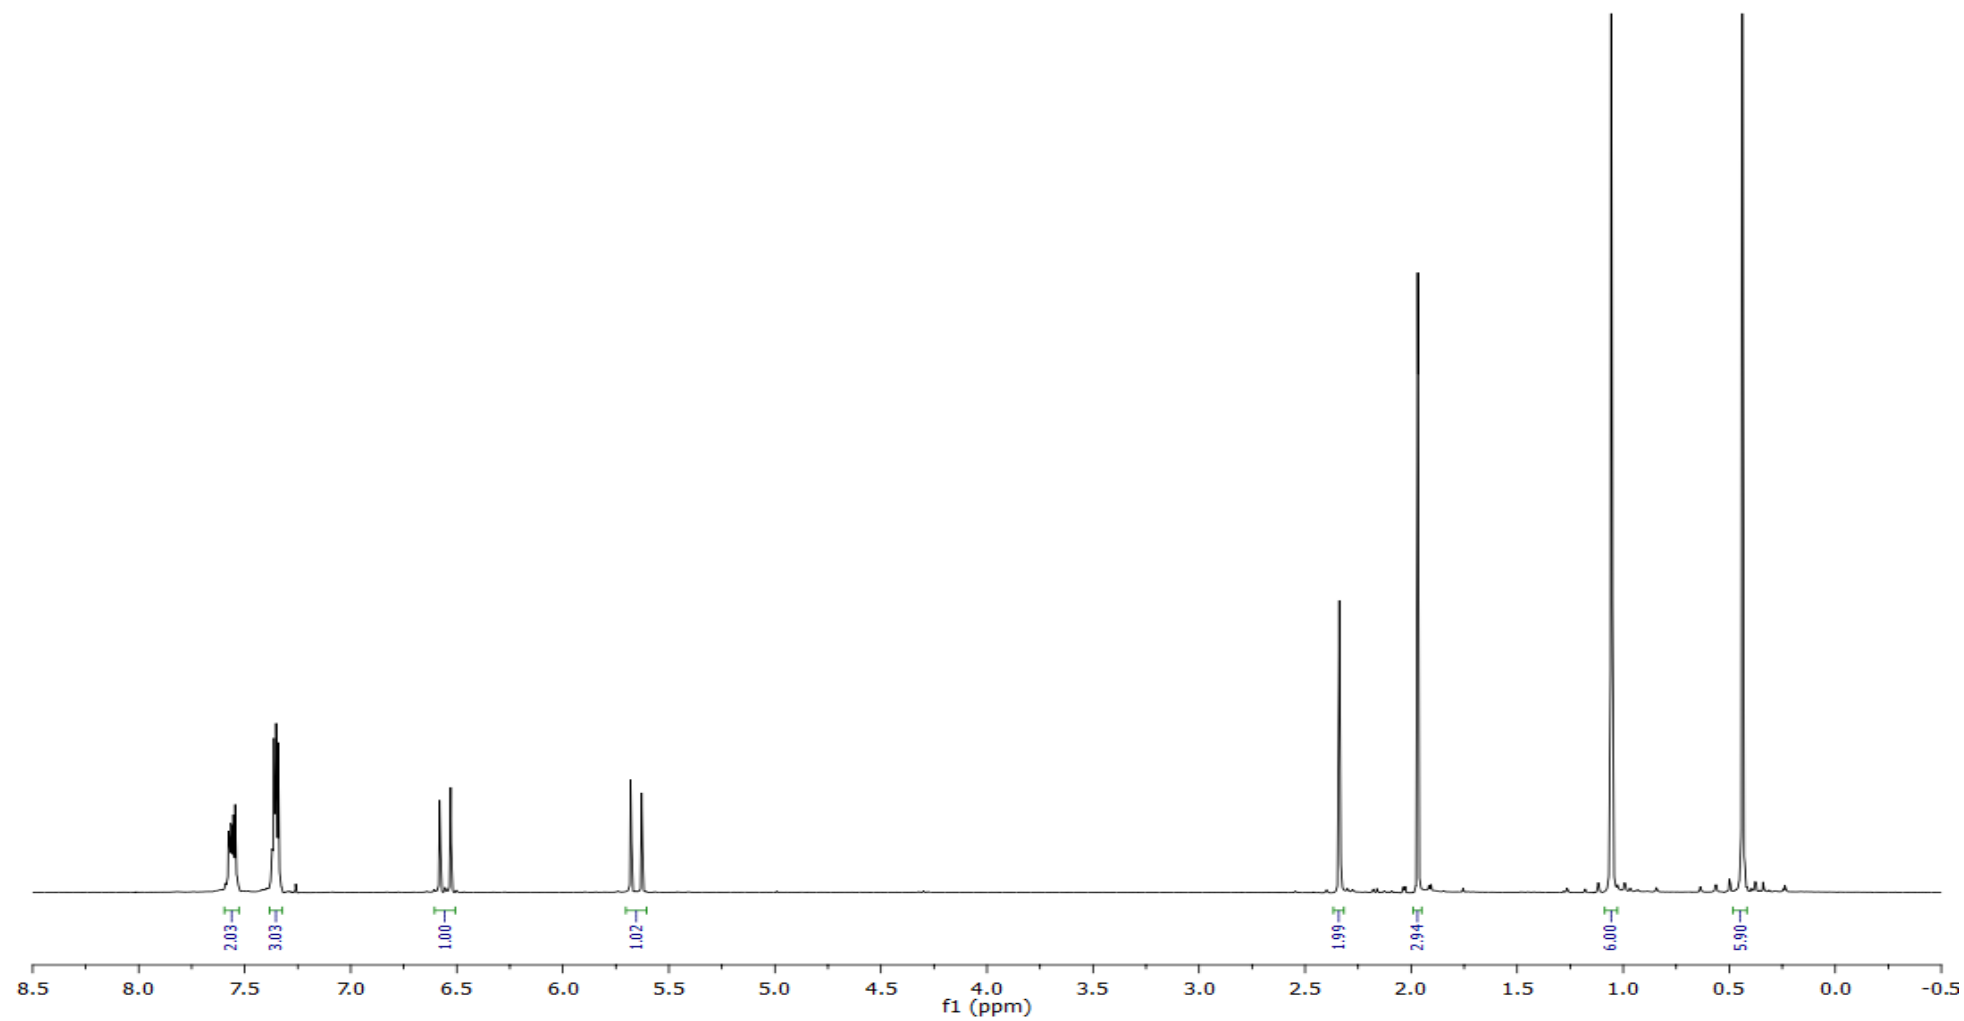

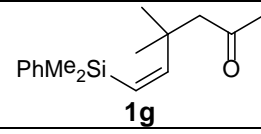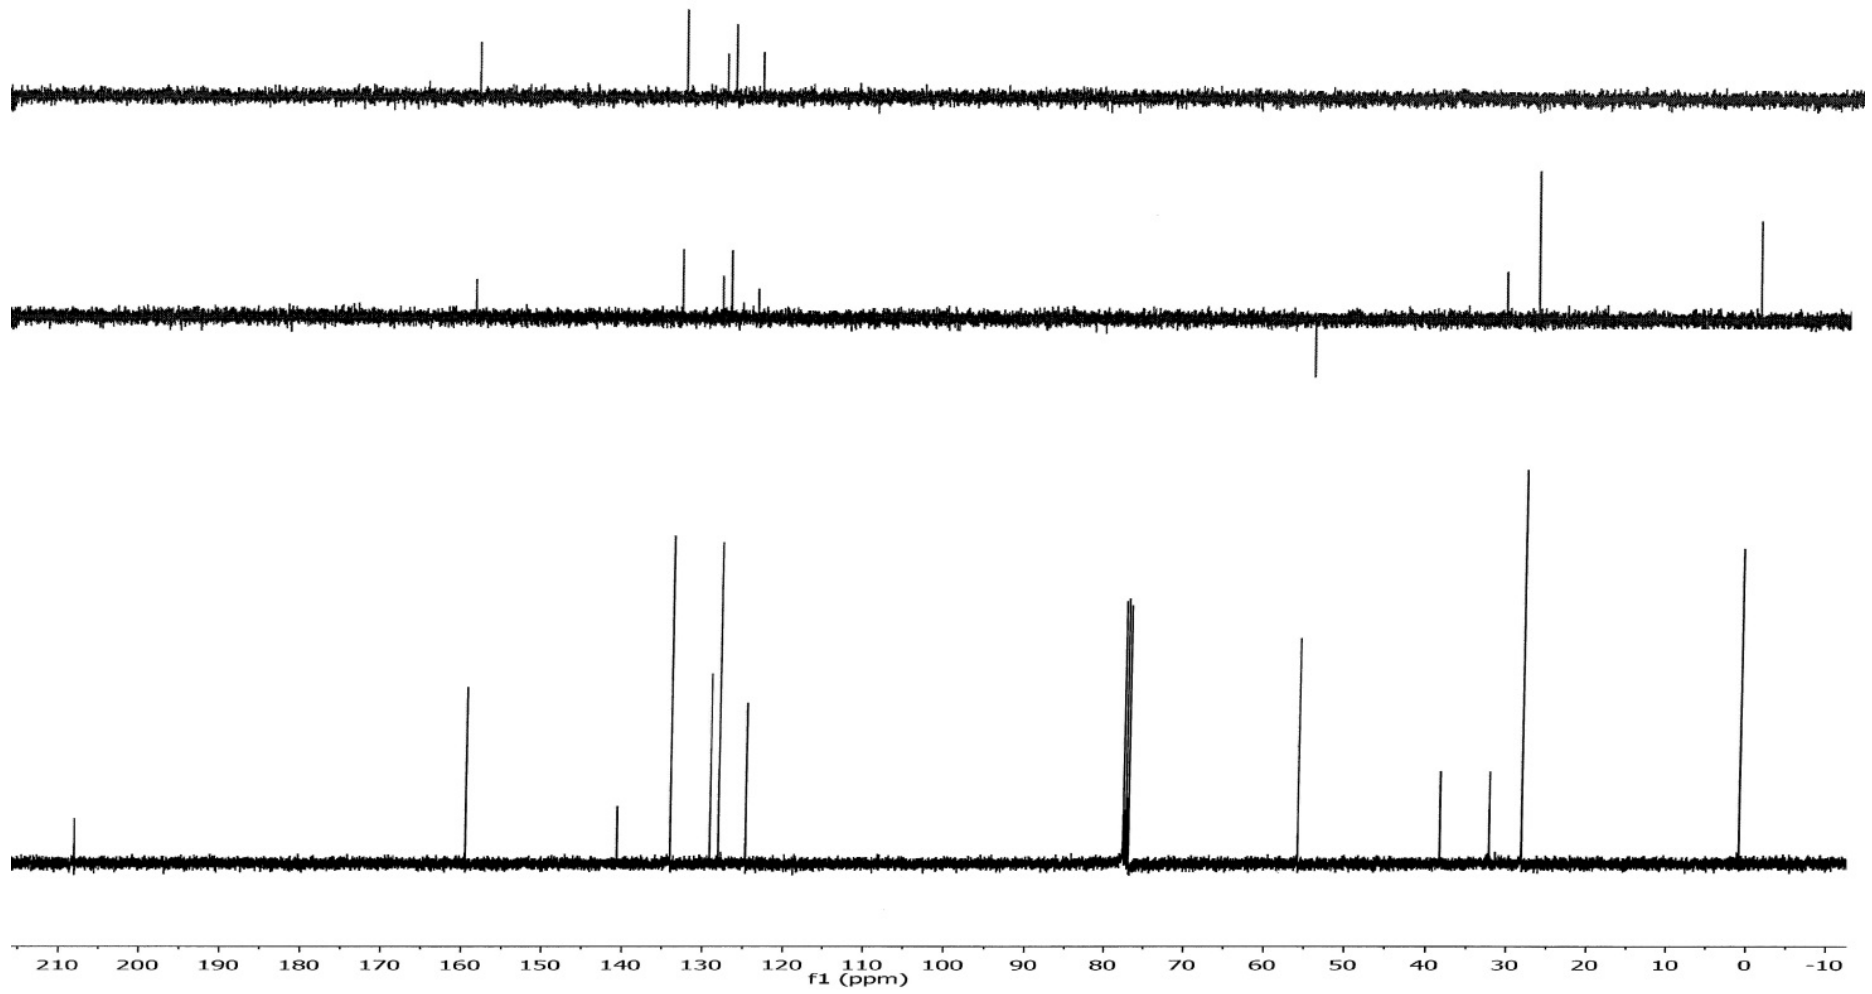

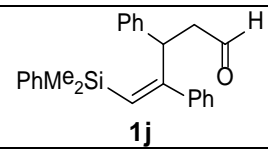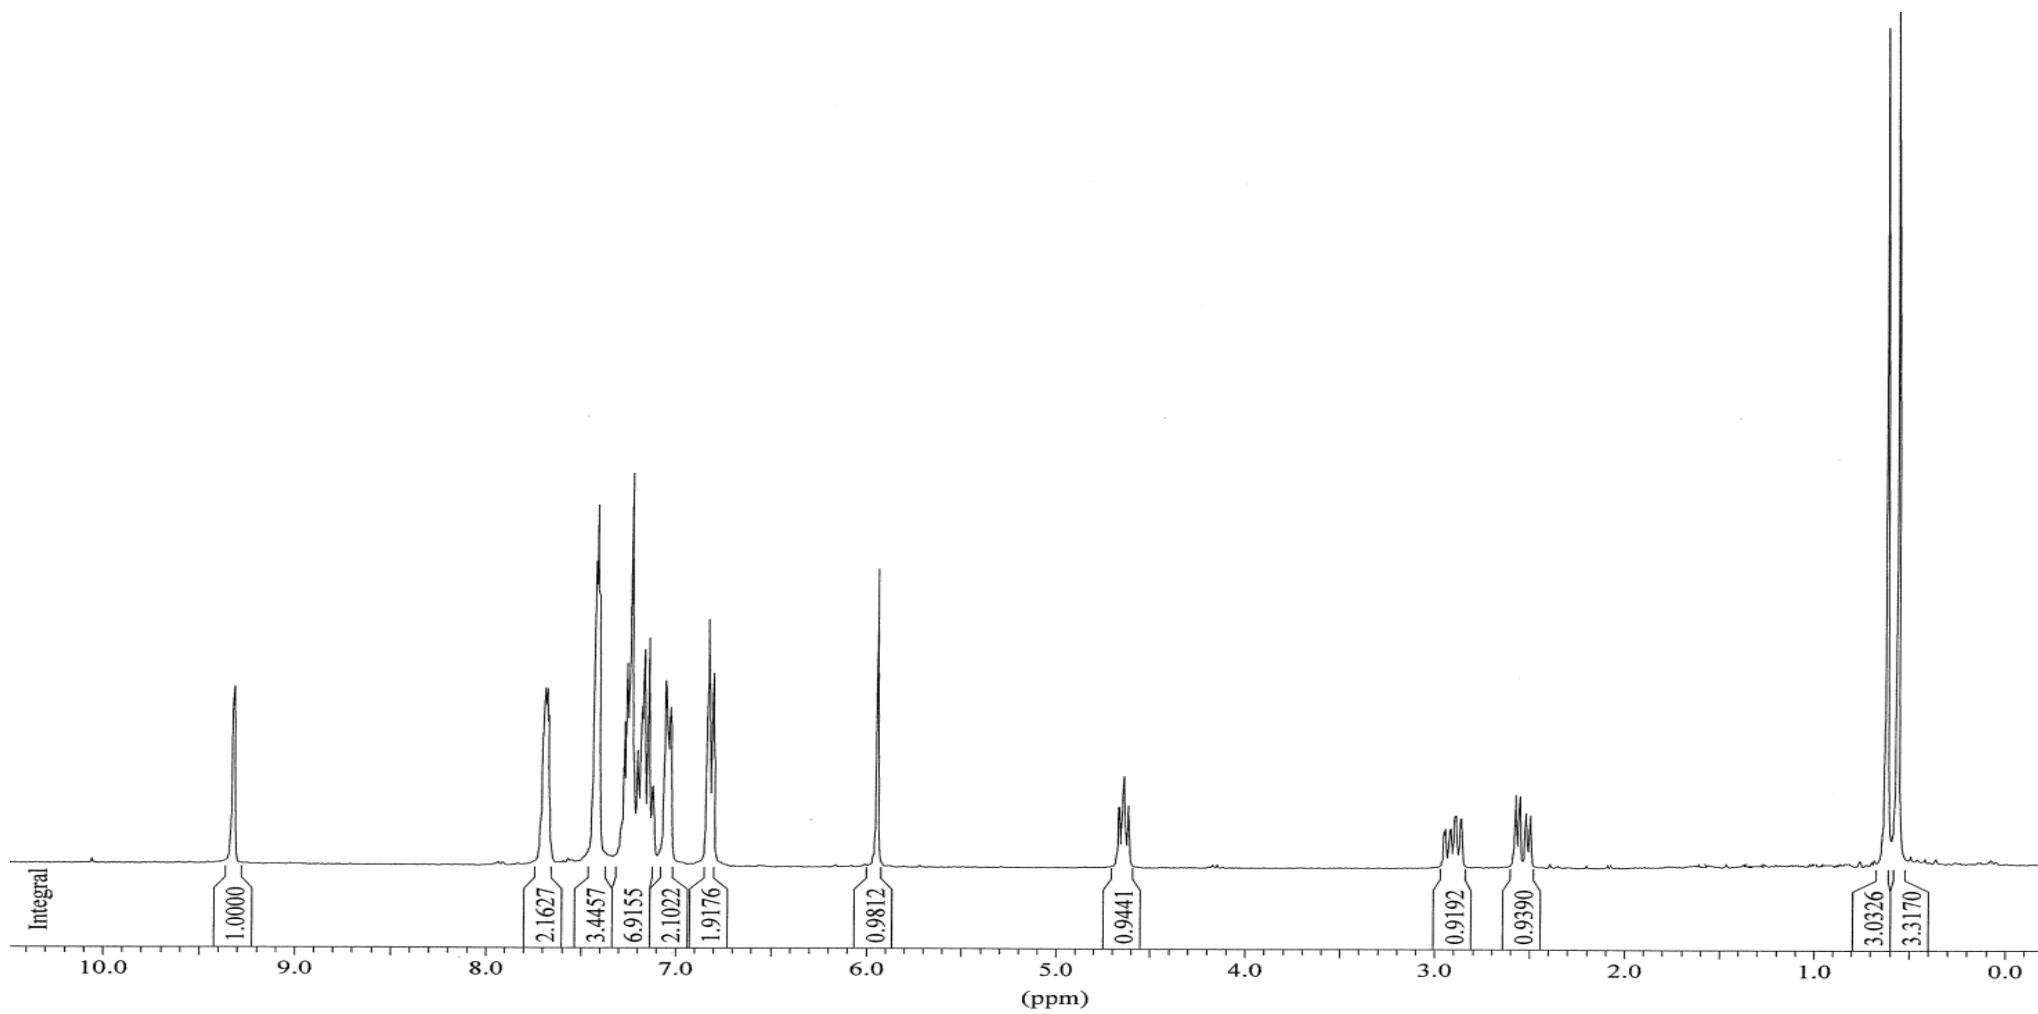

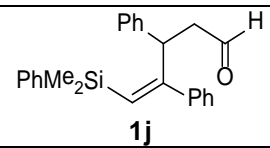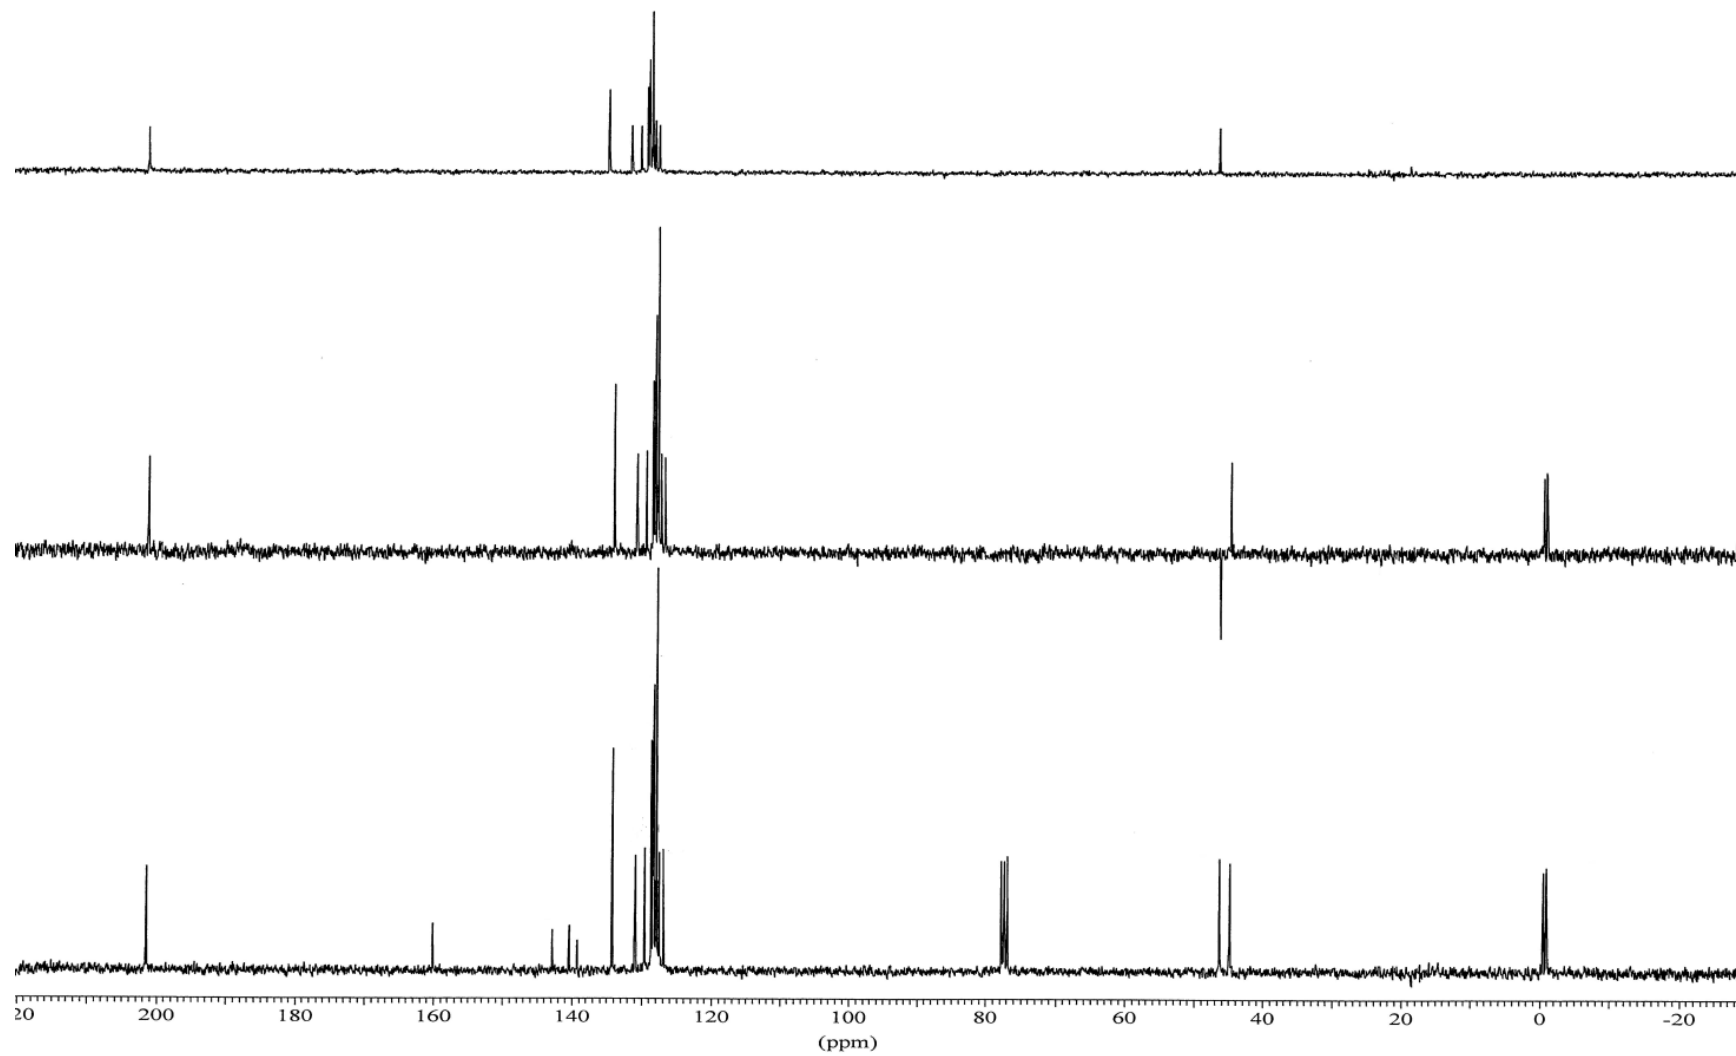

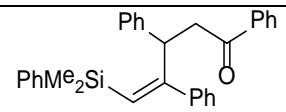

**1k**

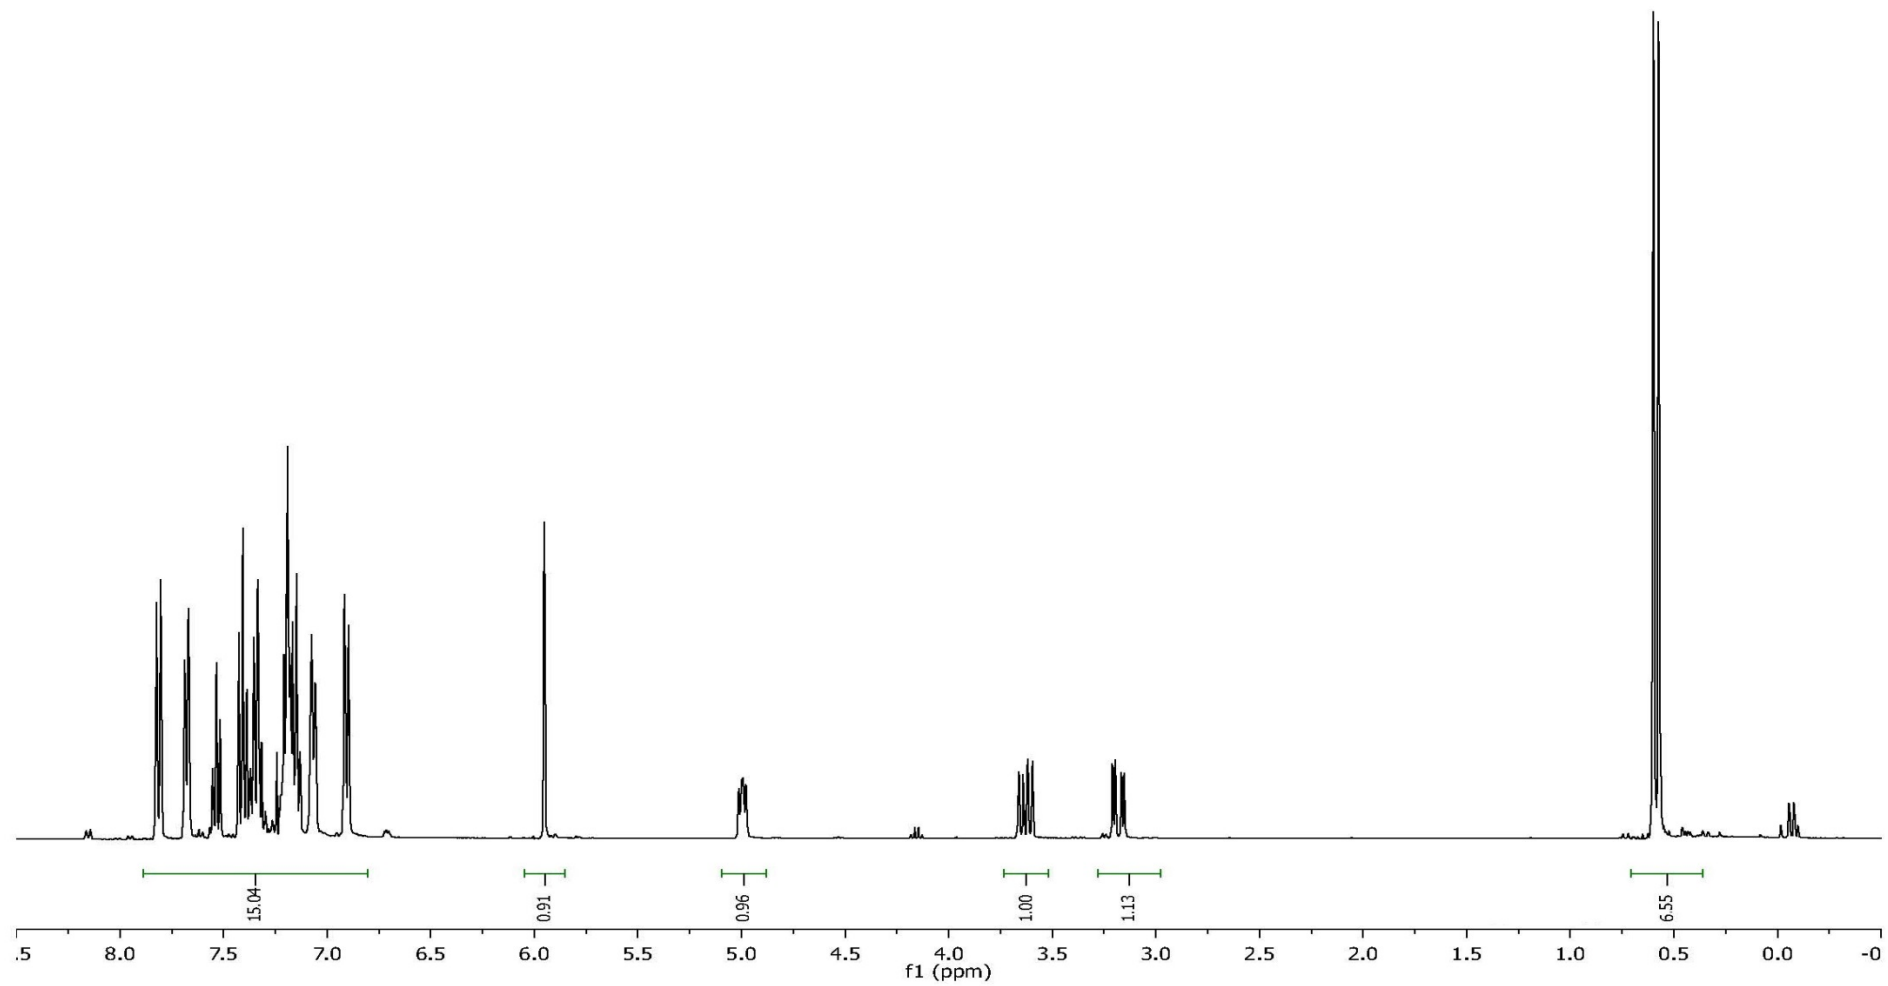





**1k**

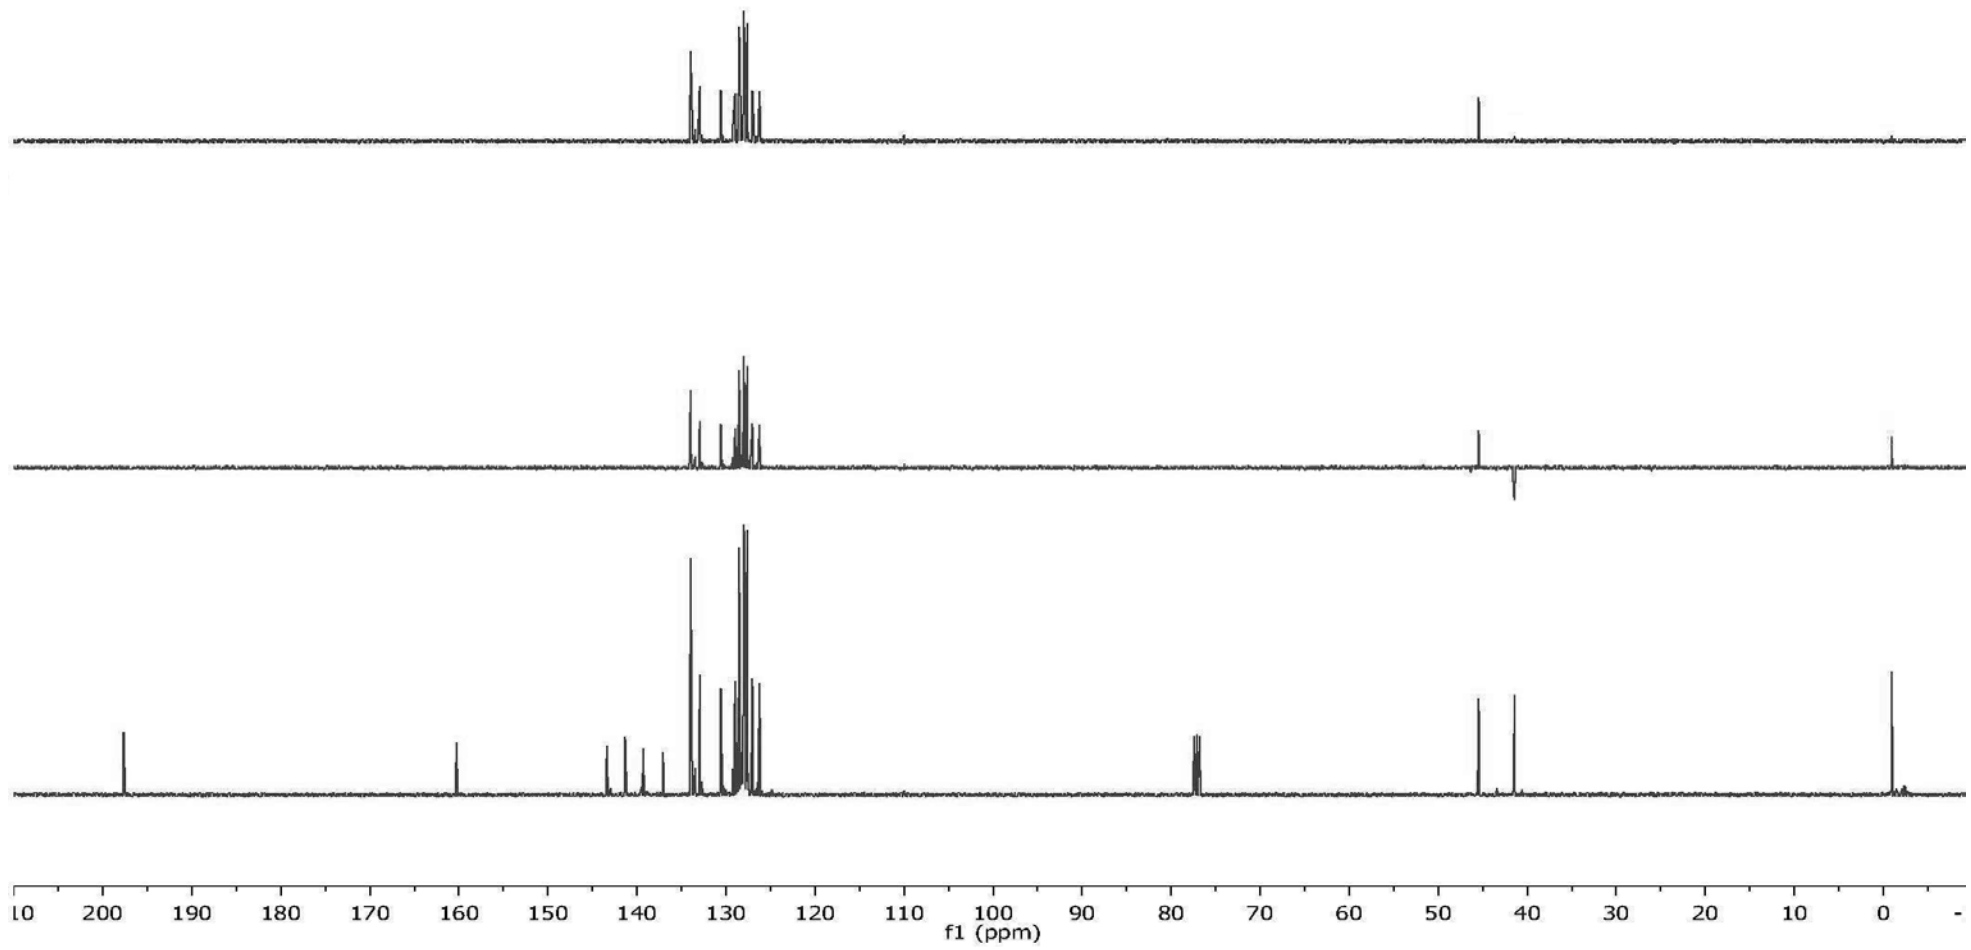

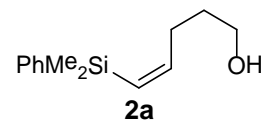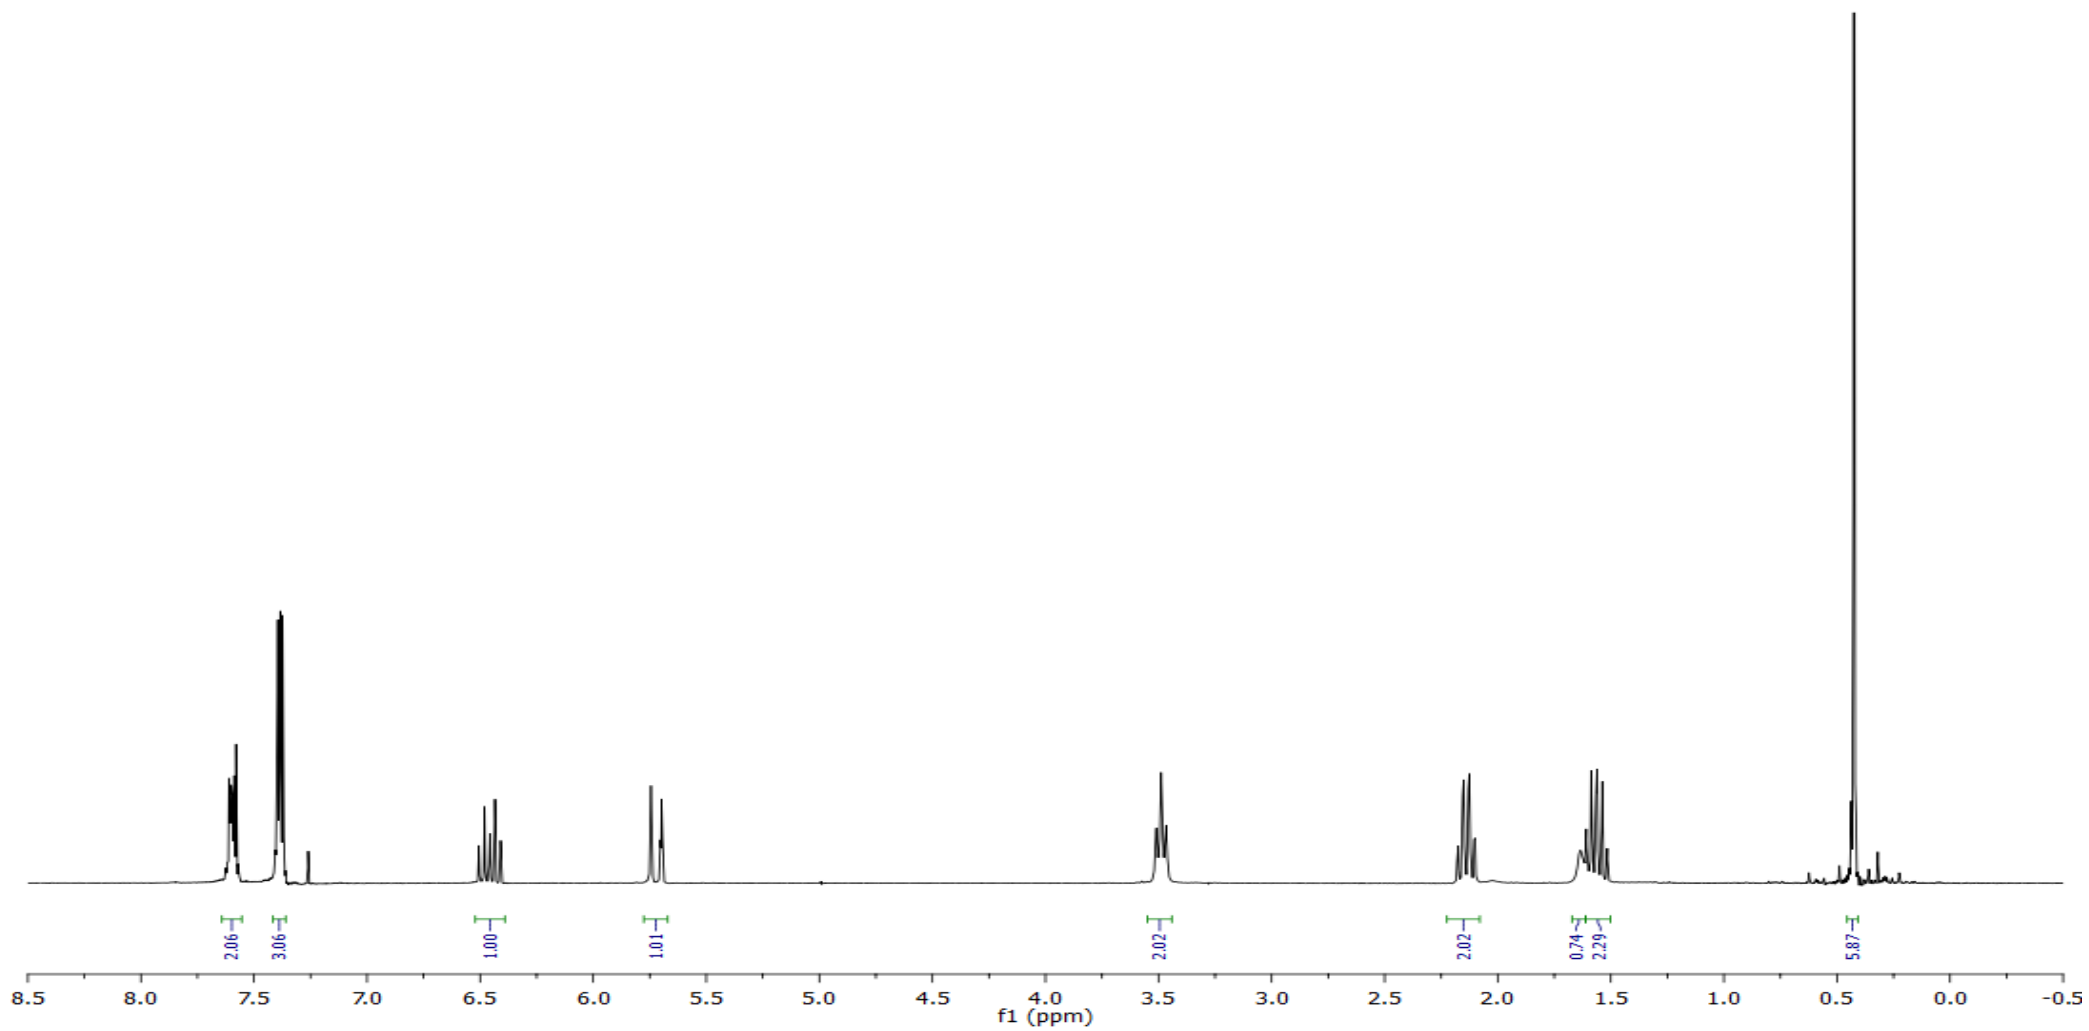

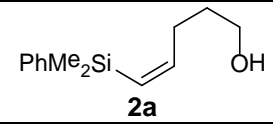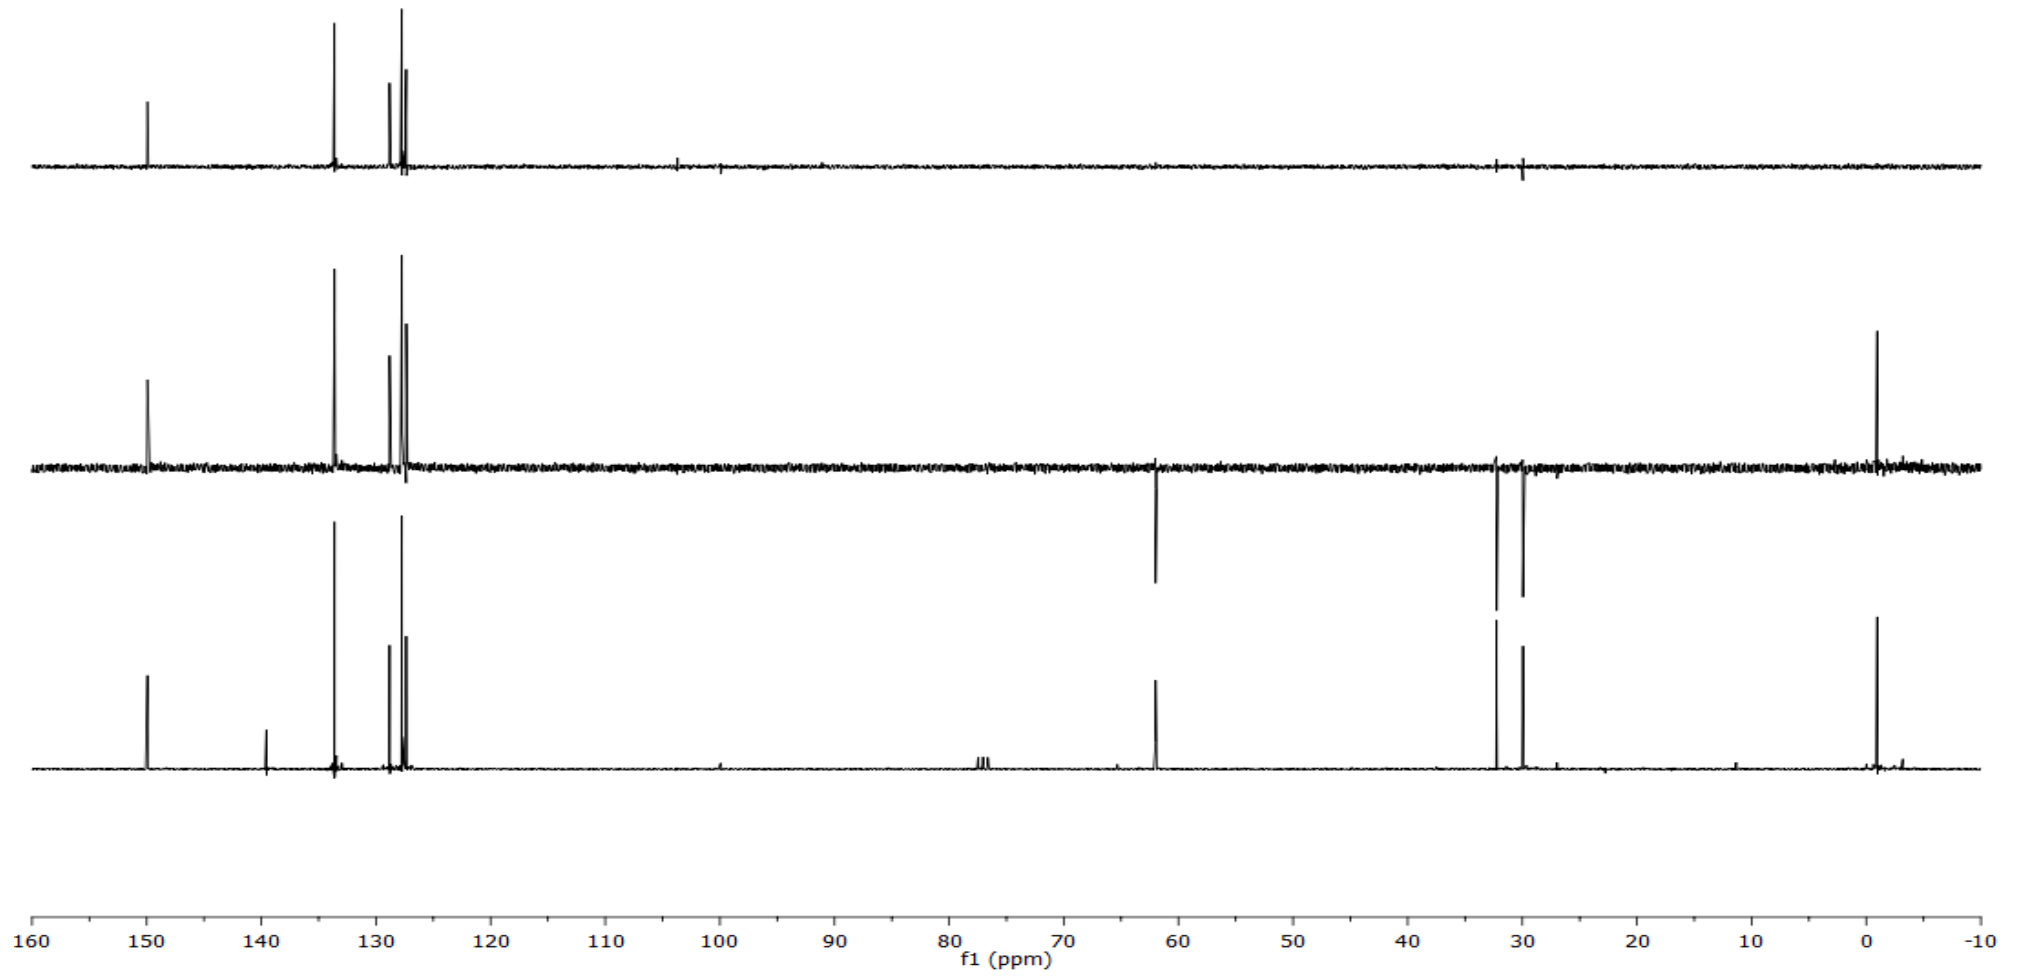

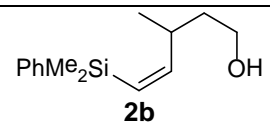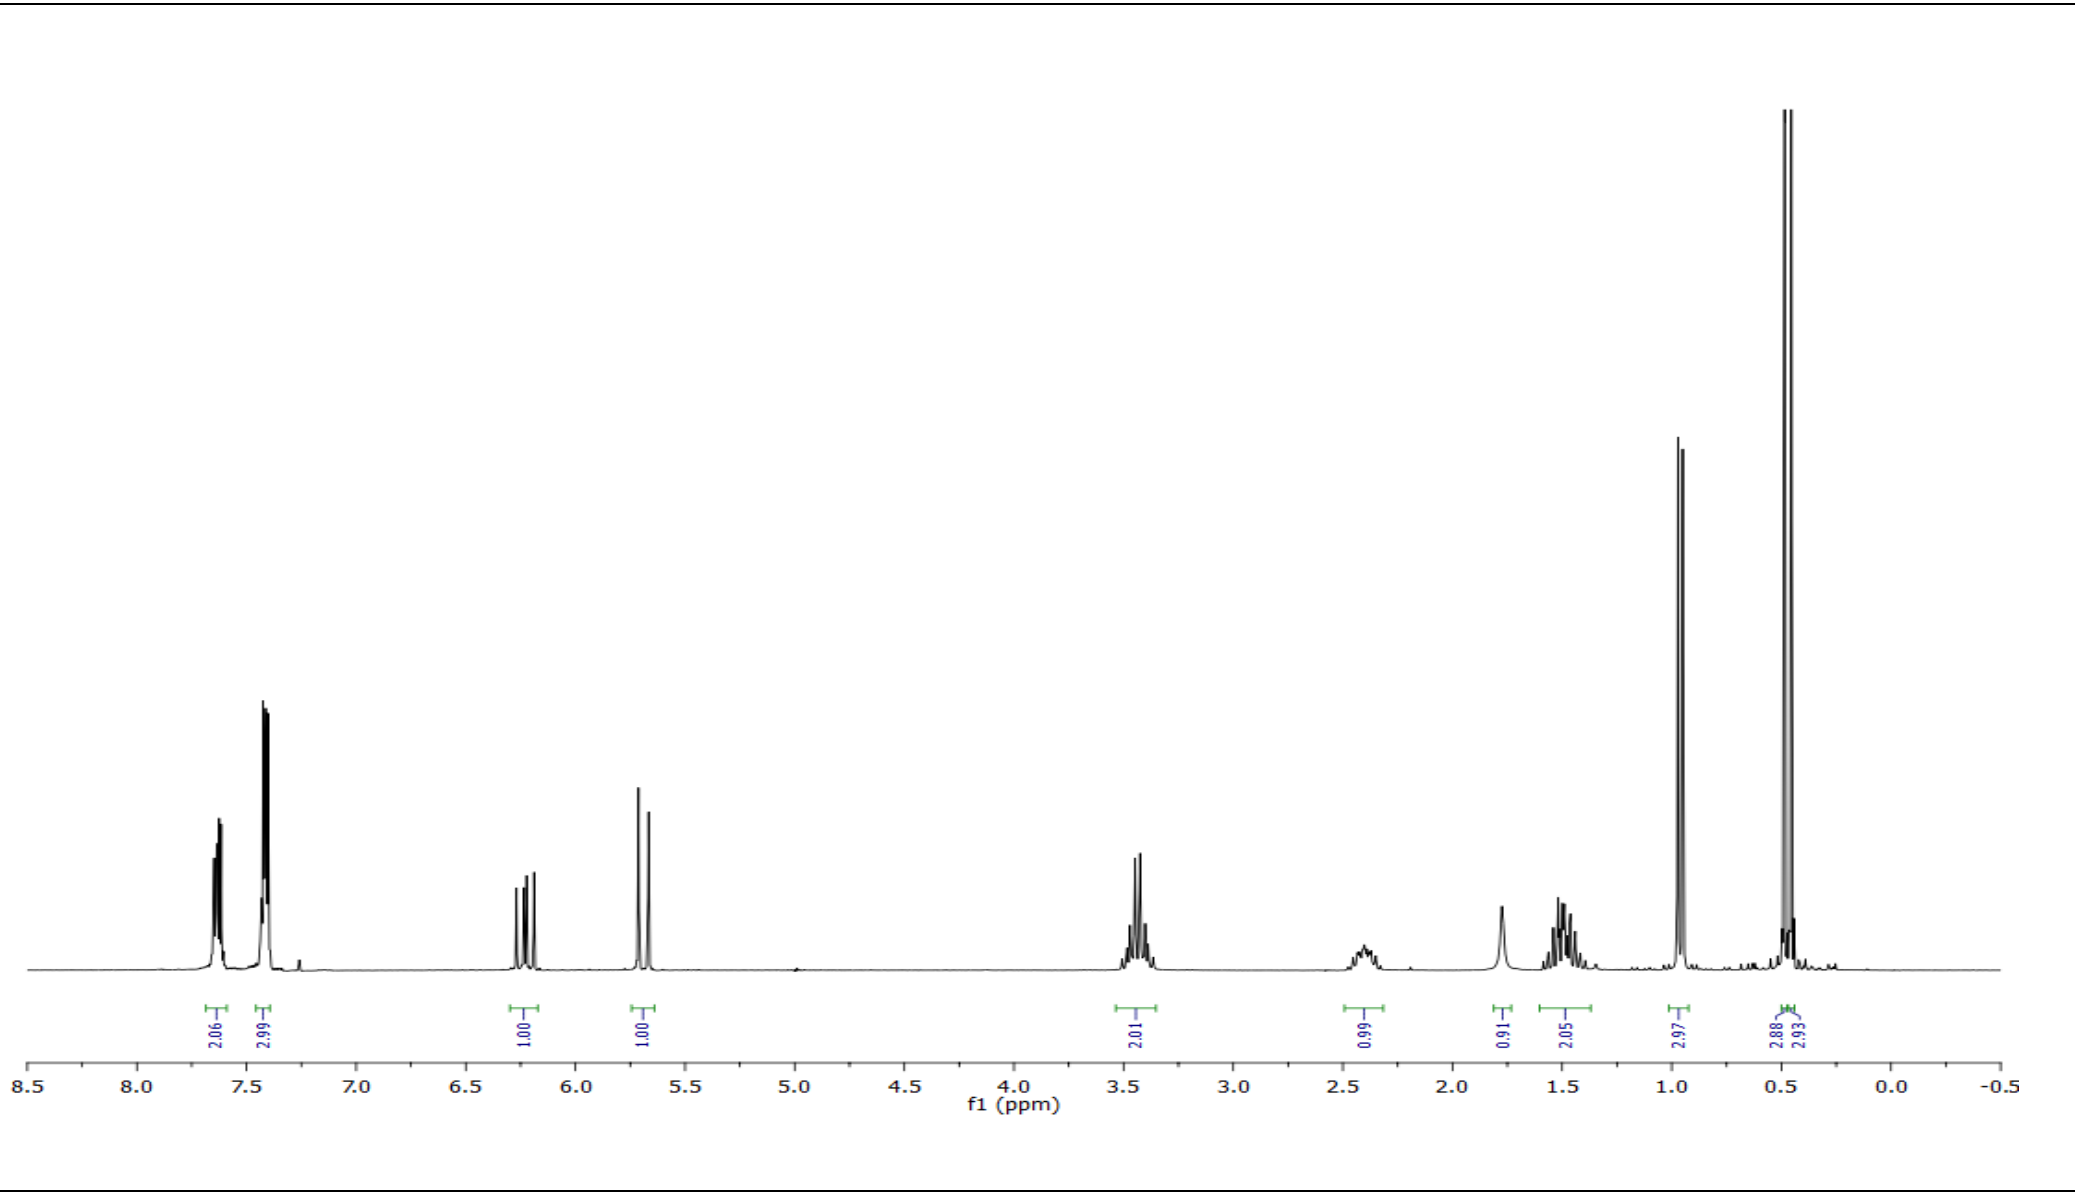

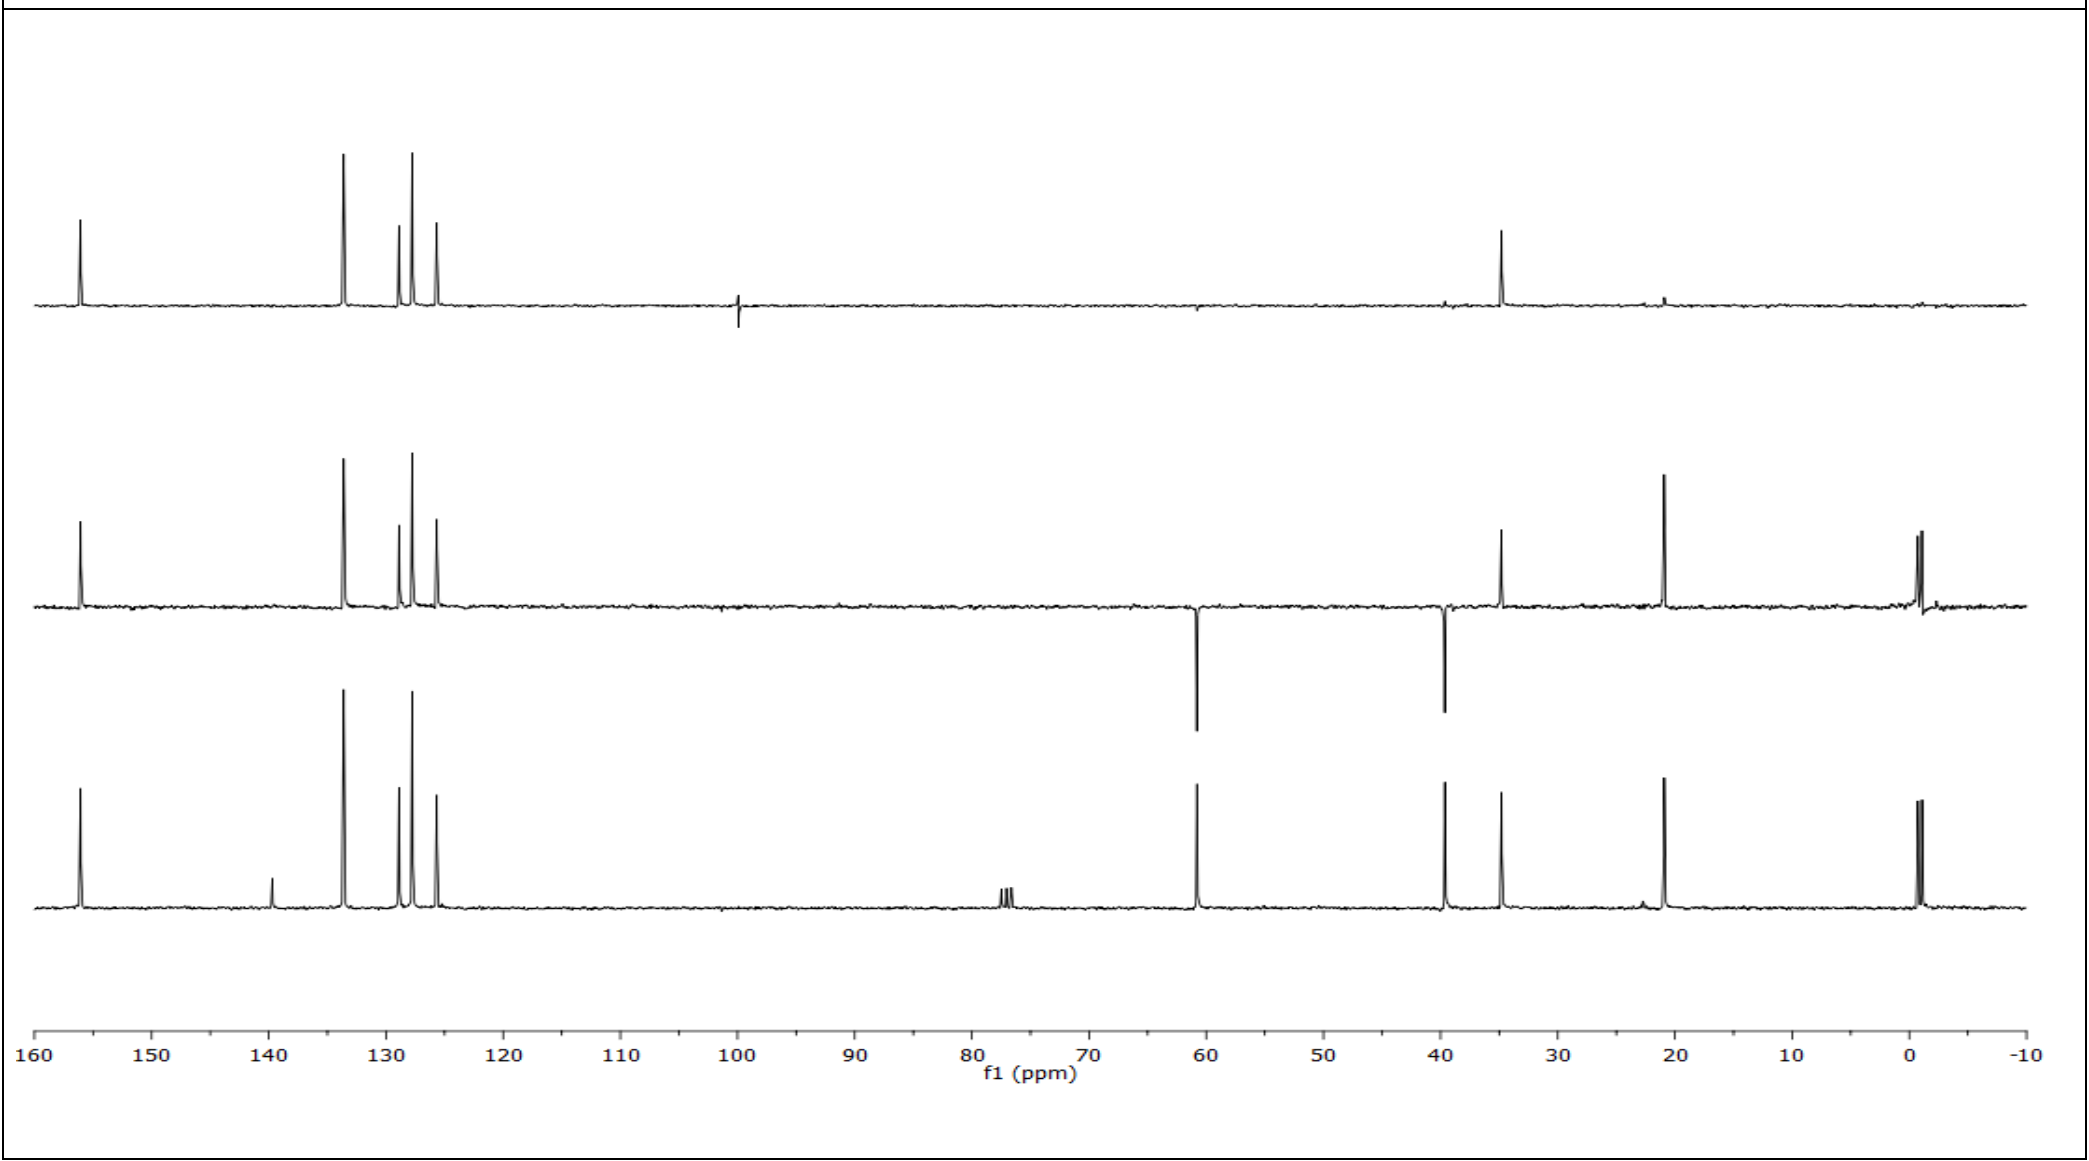

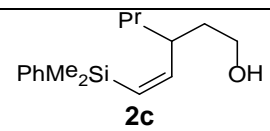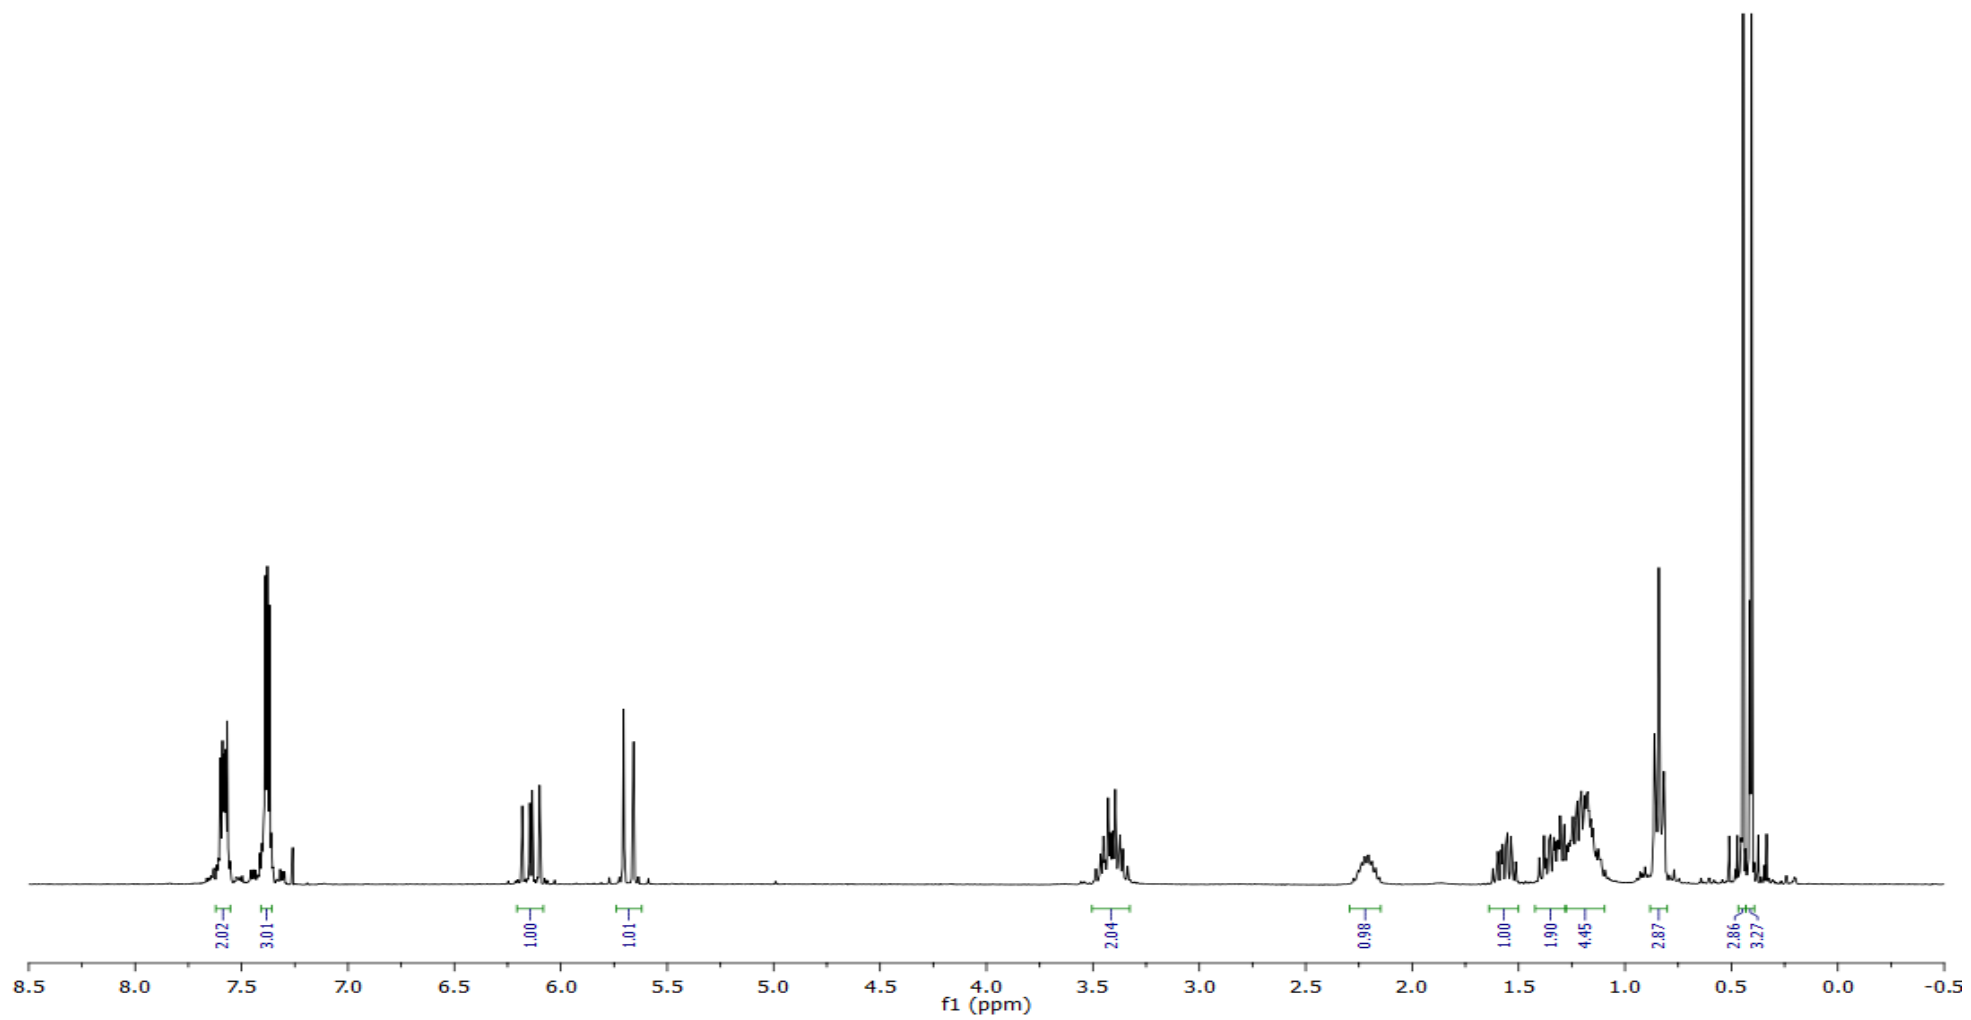

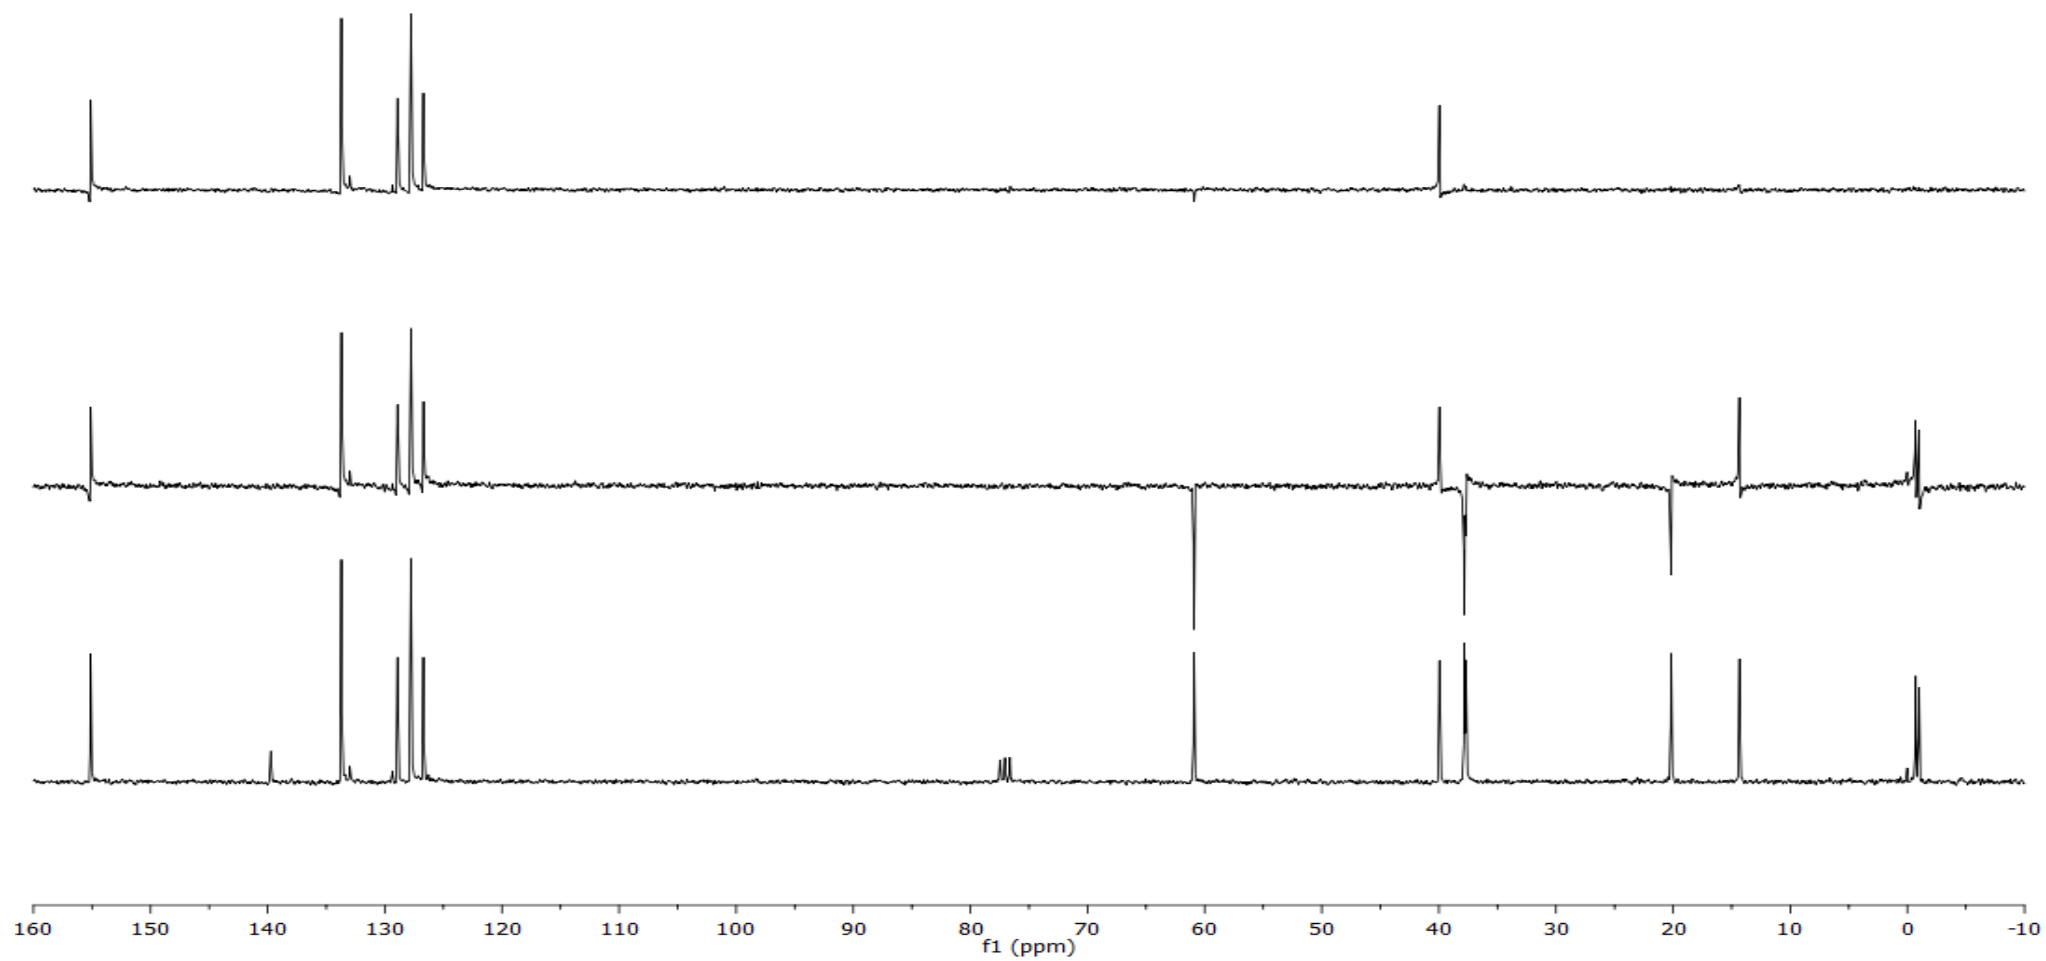

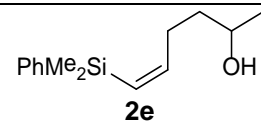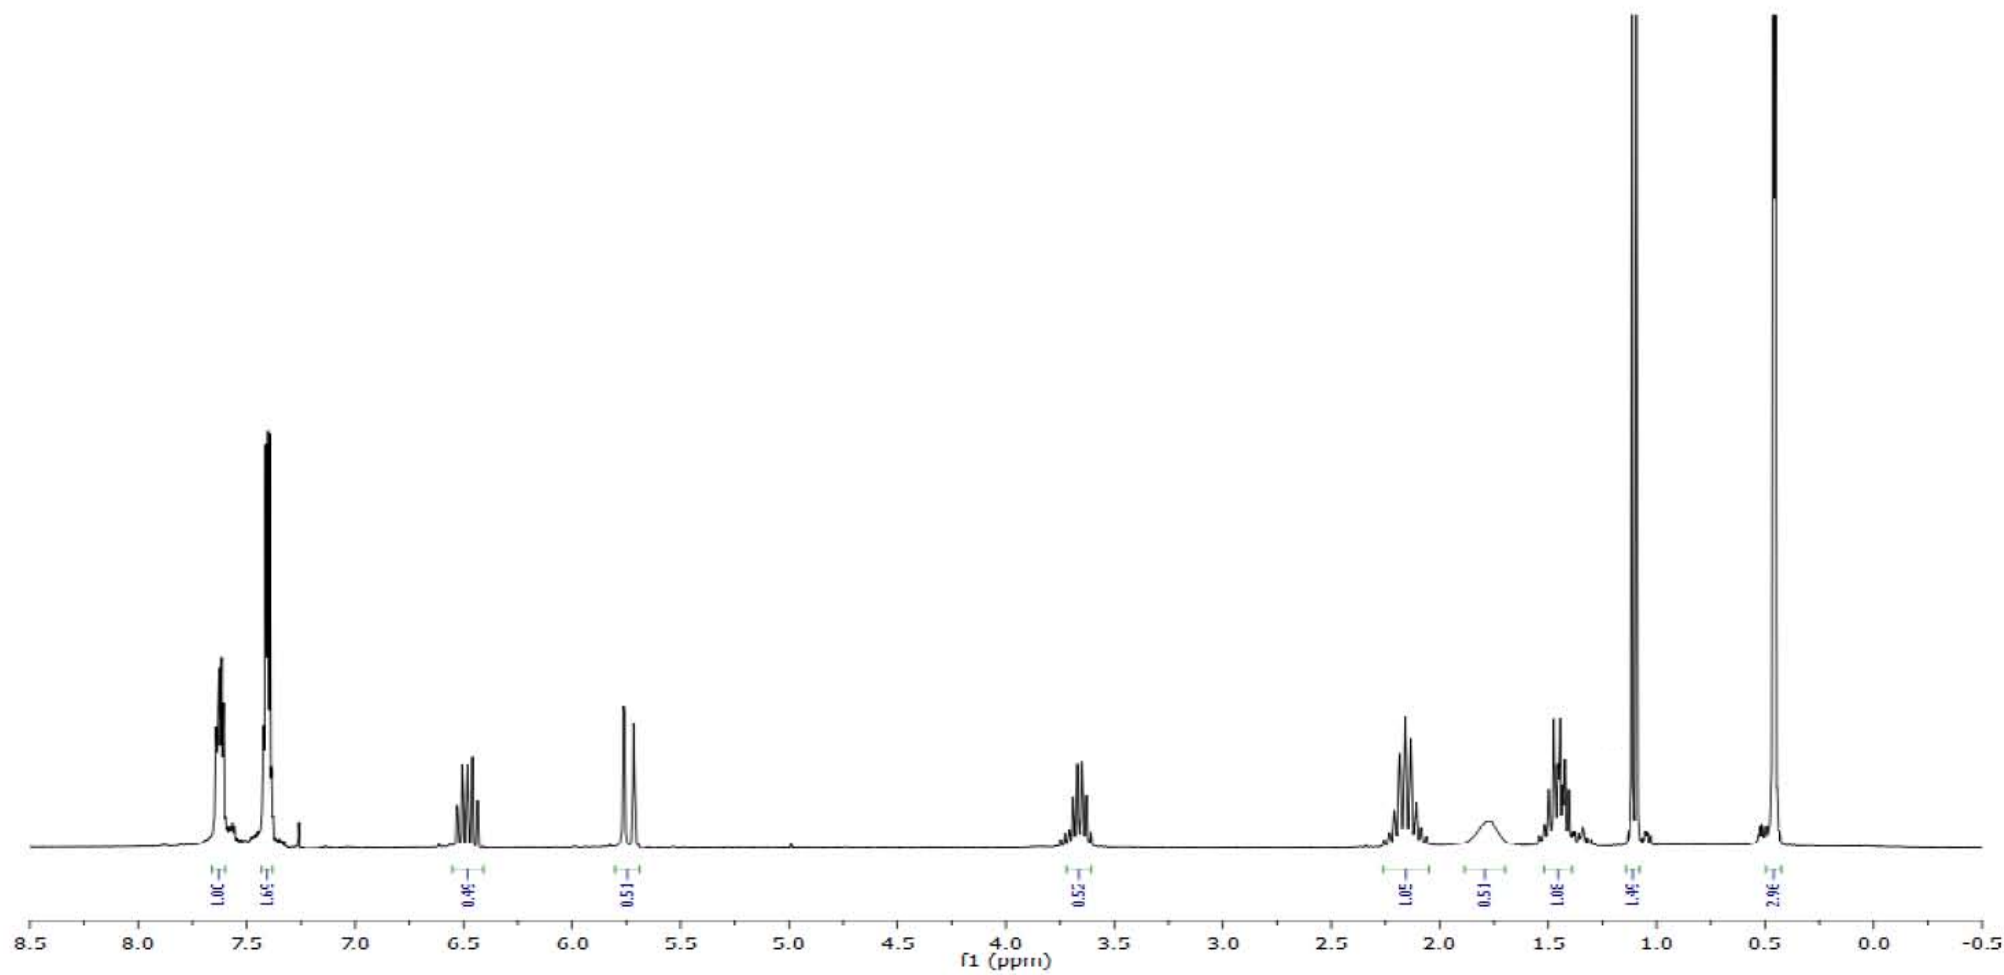



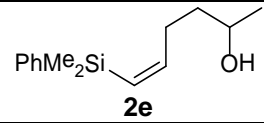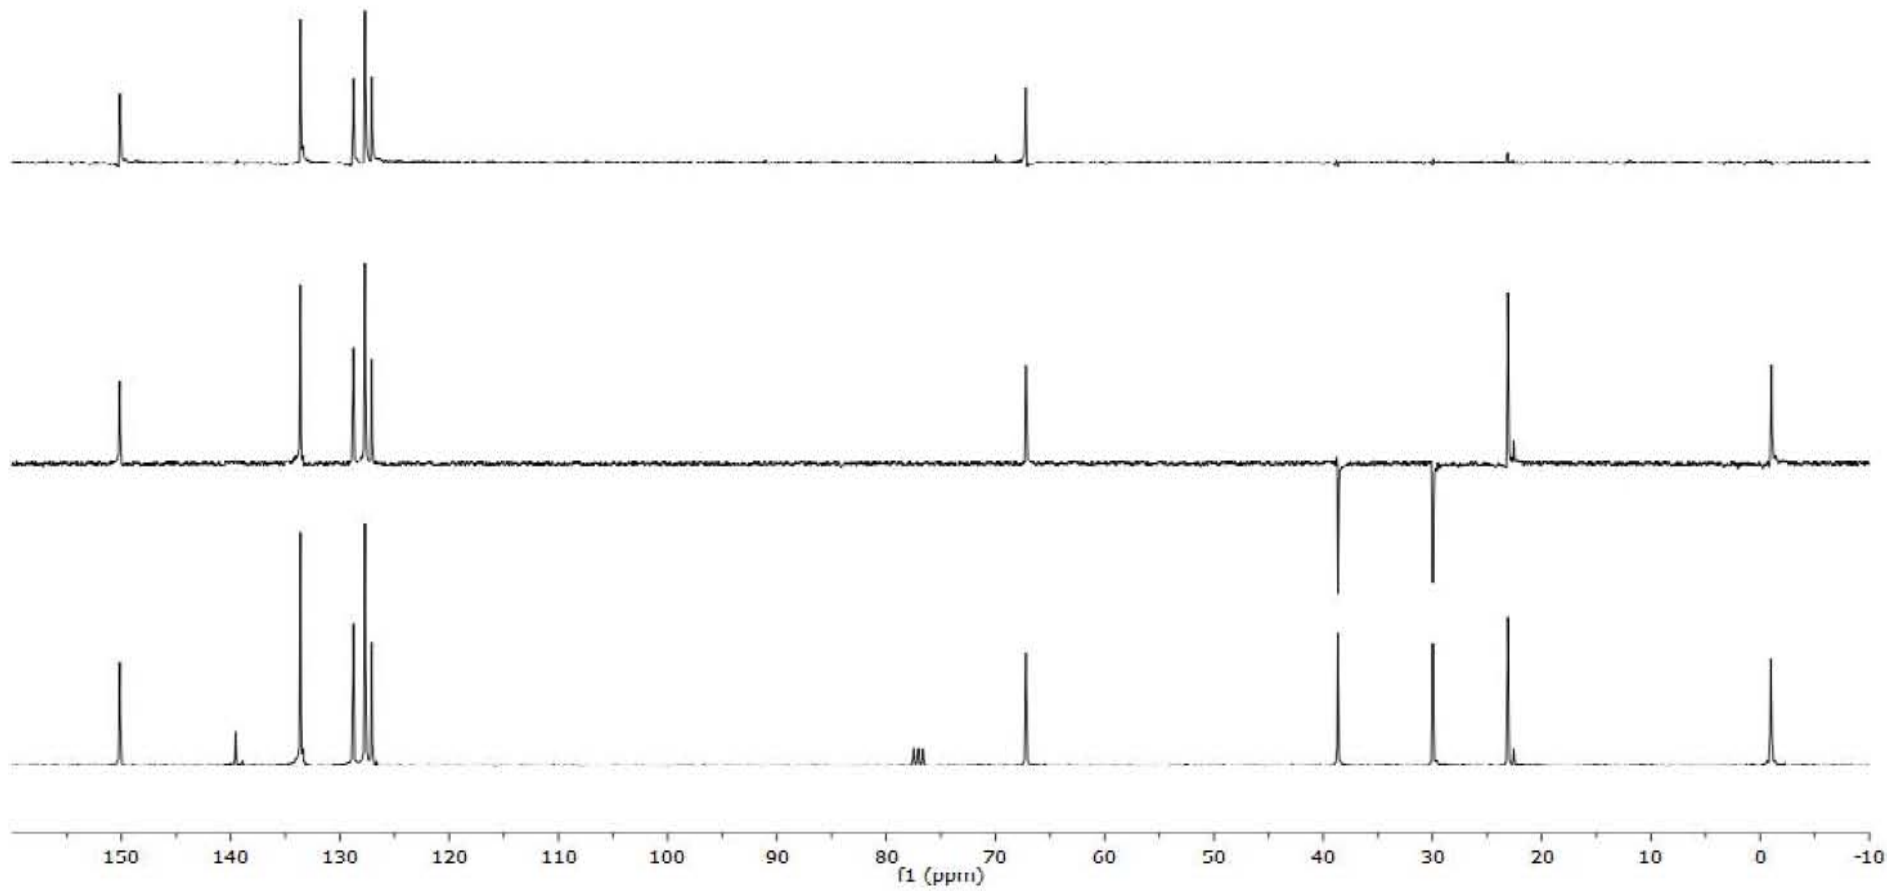

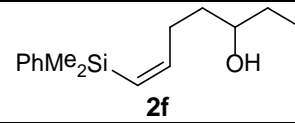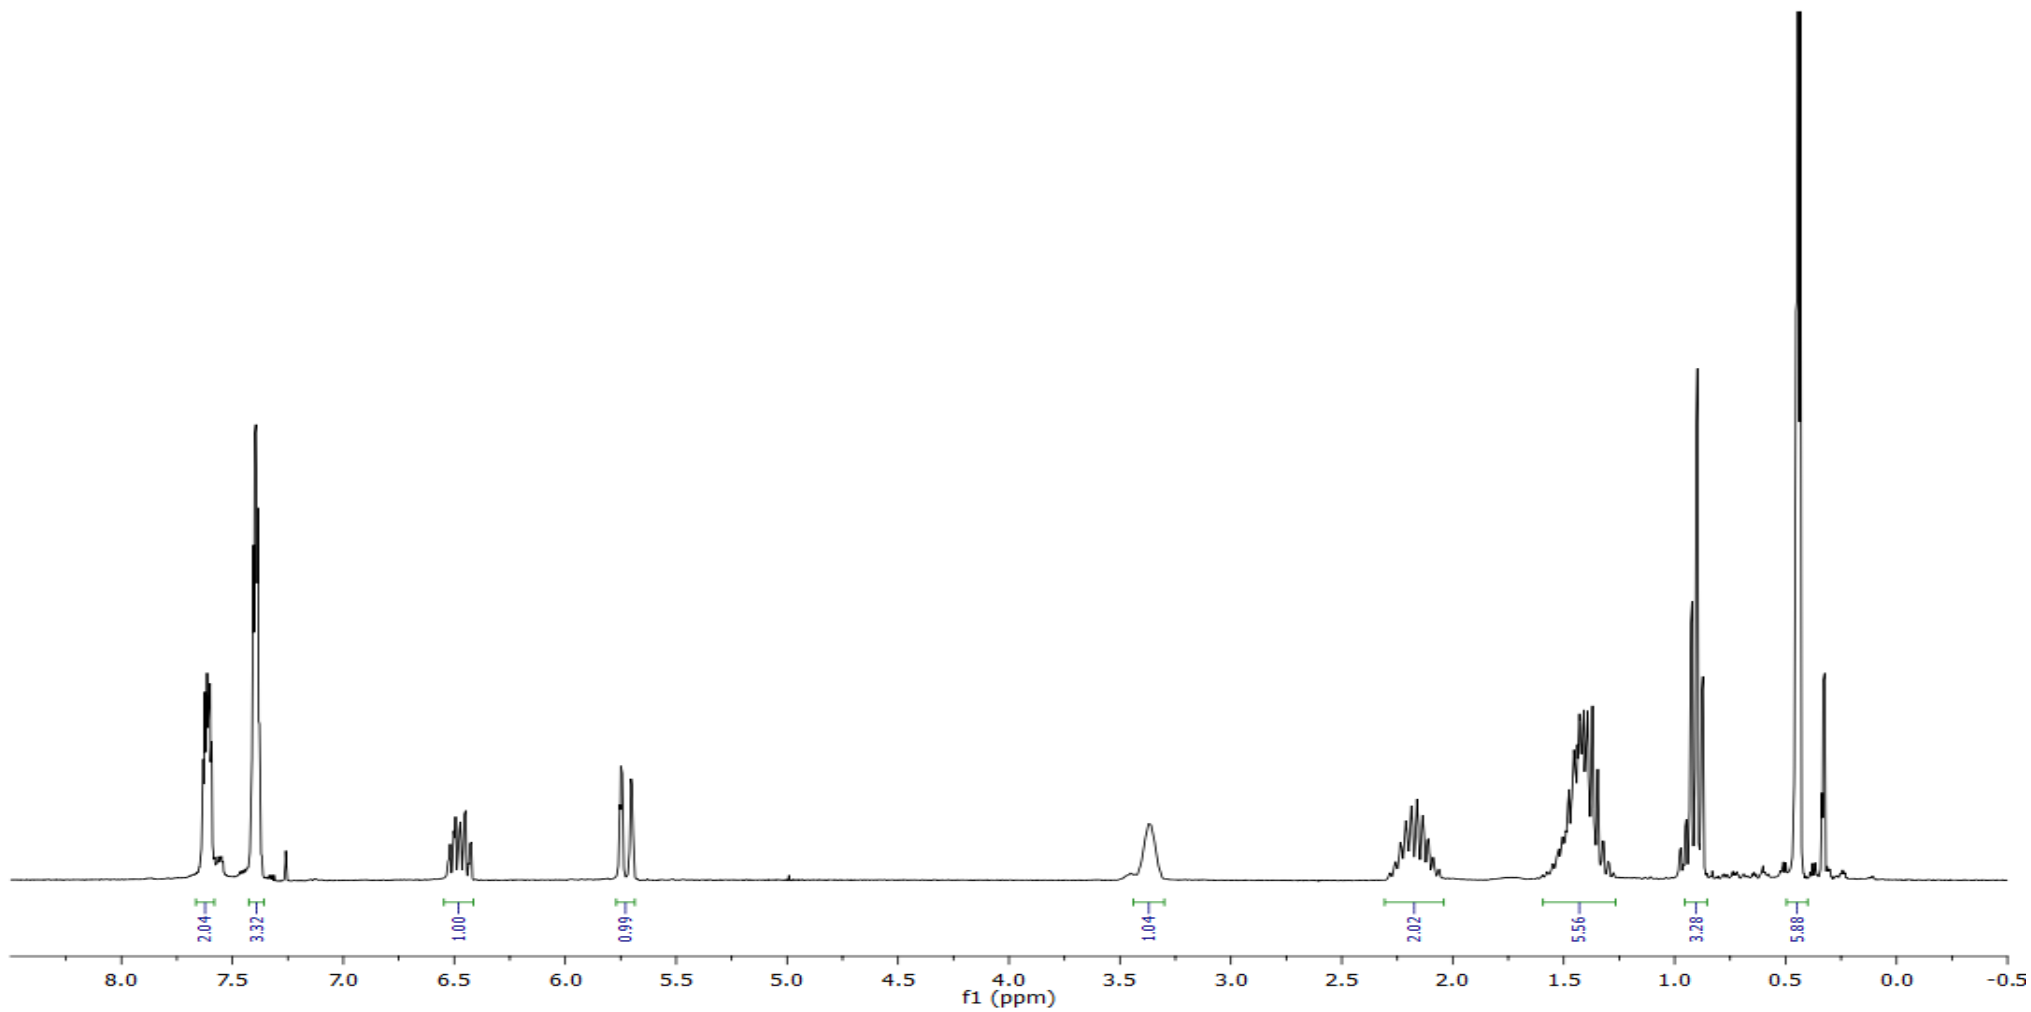

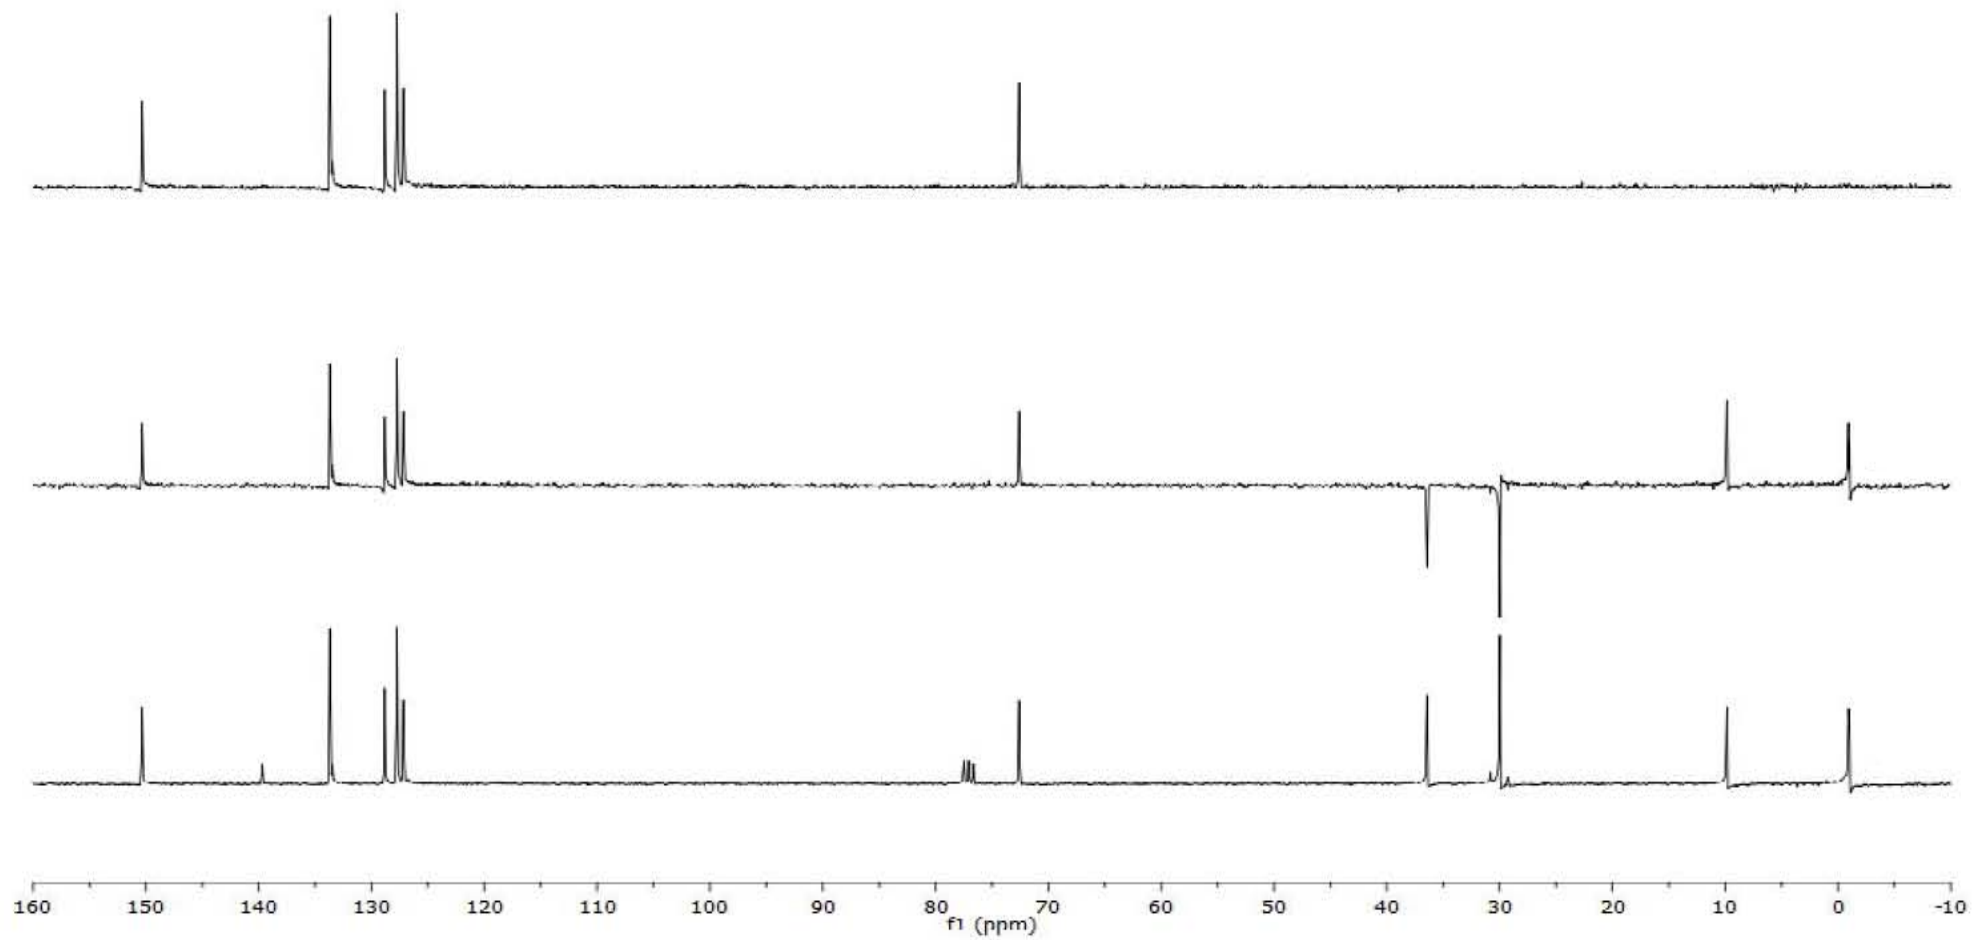

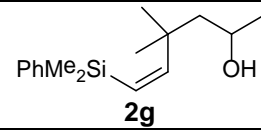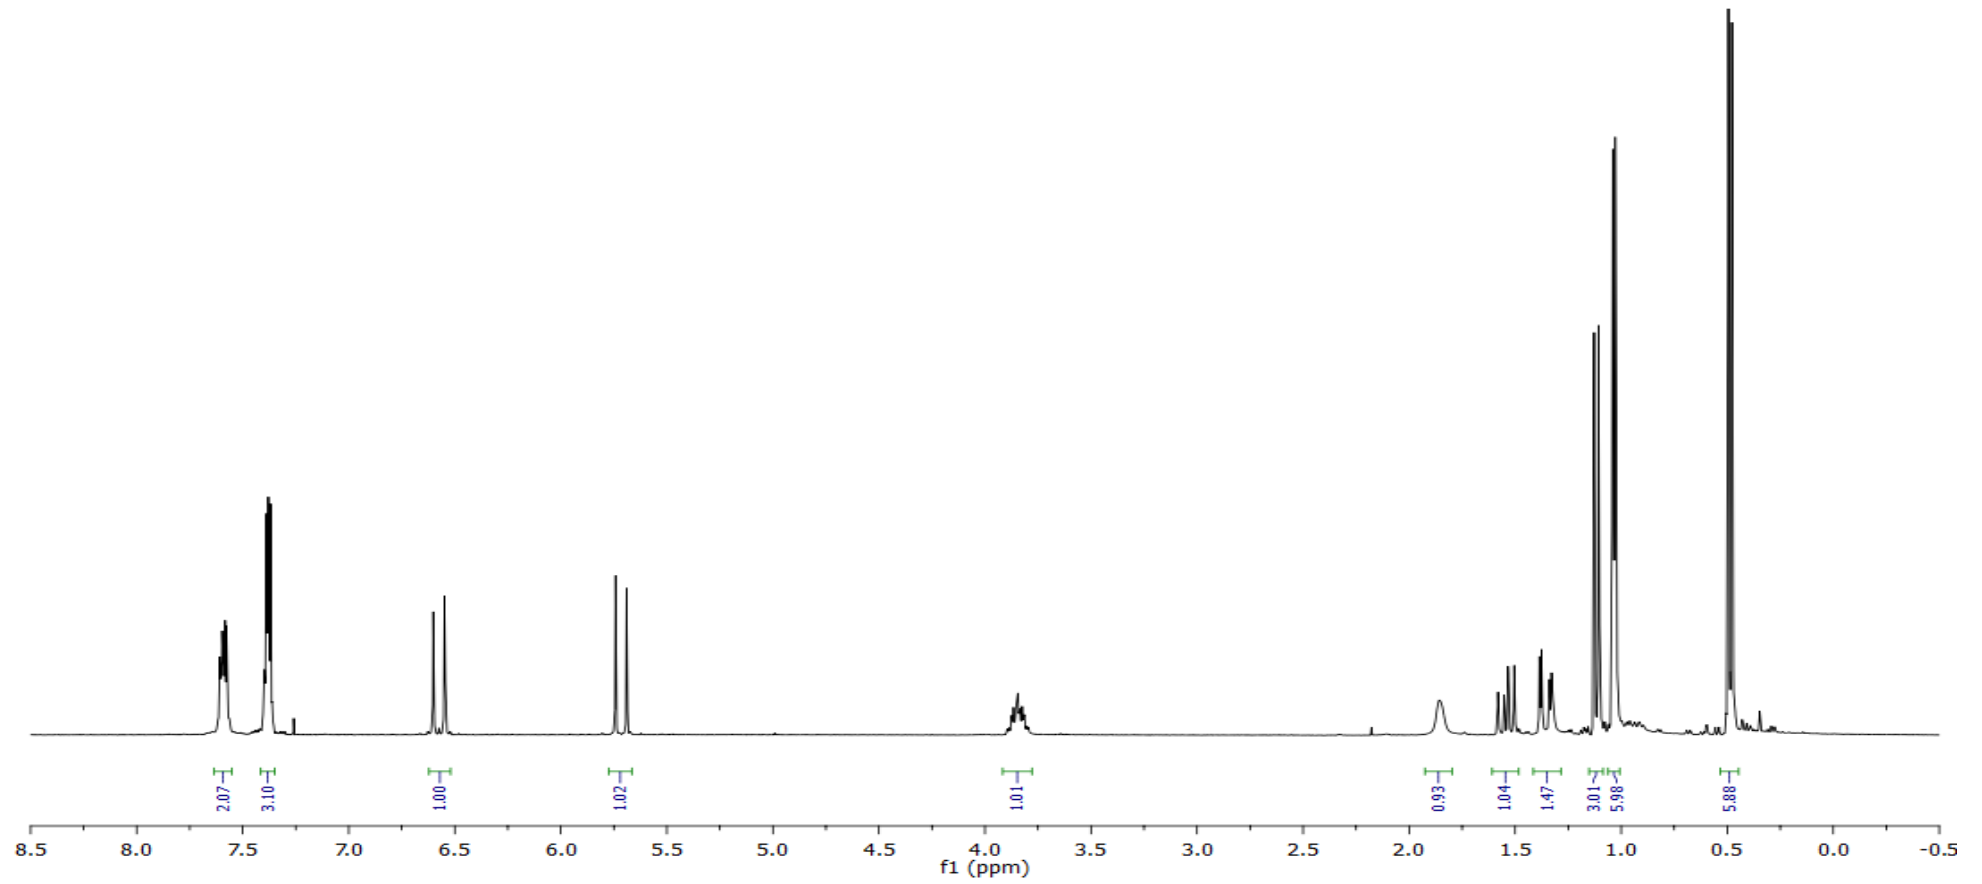

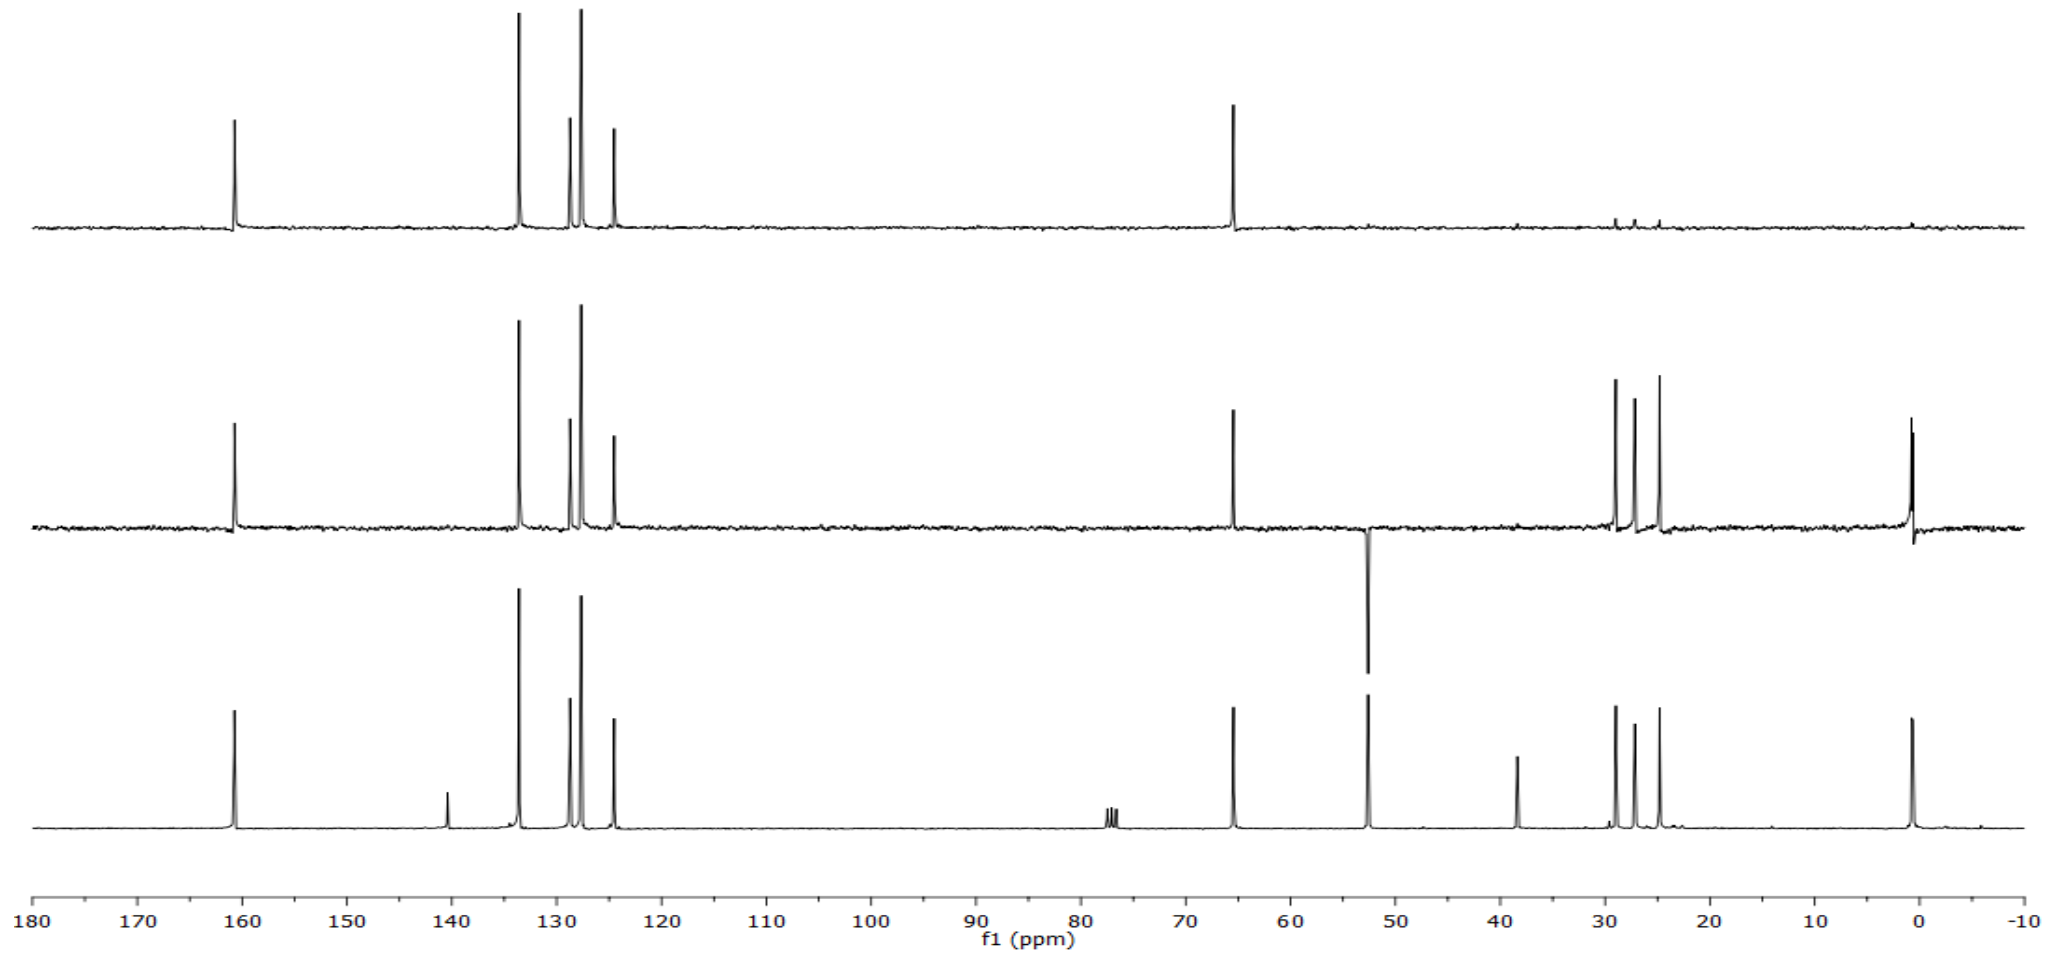

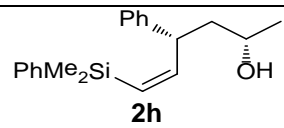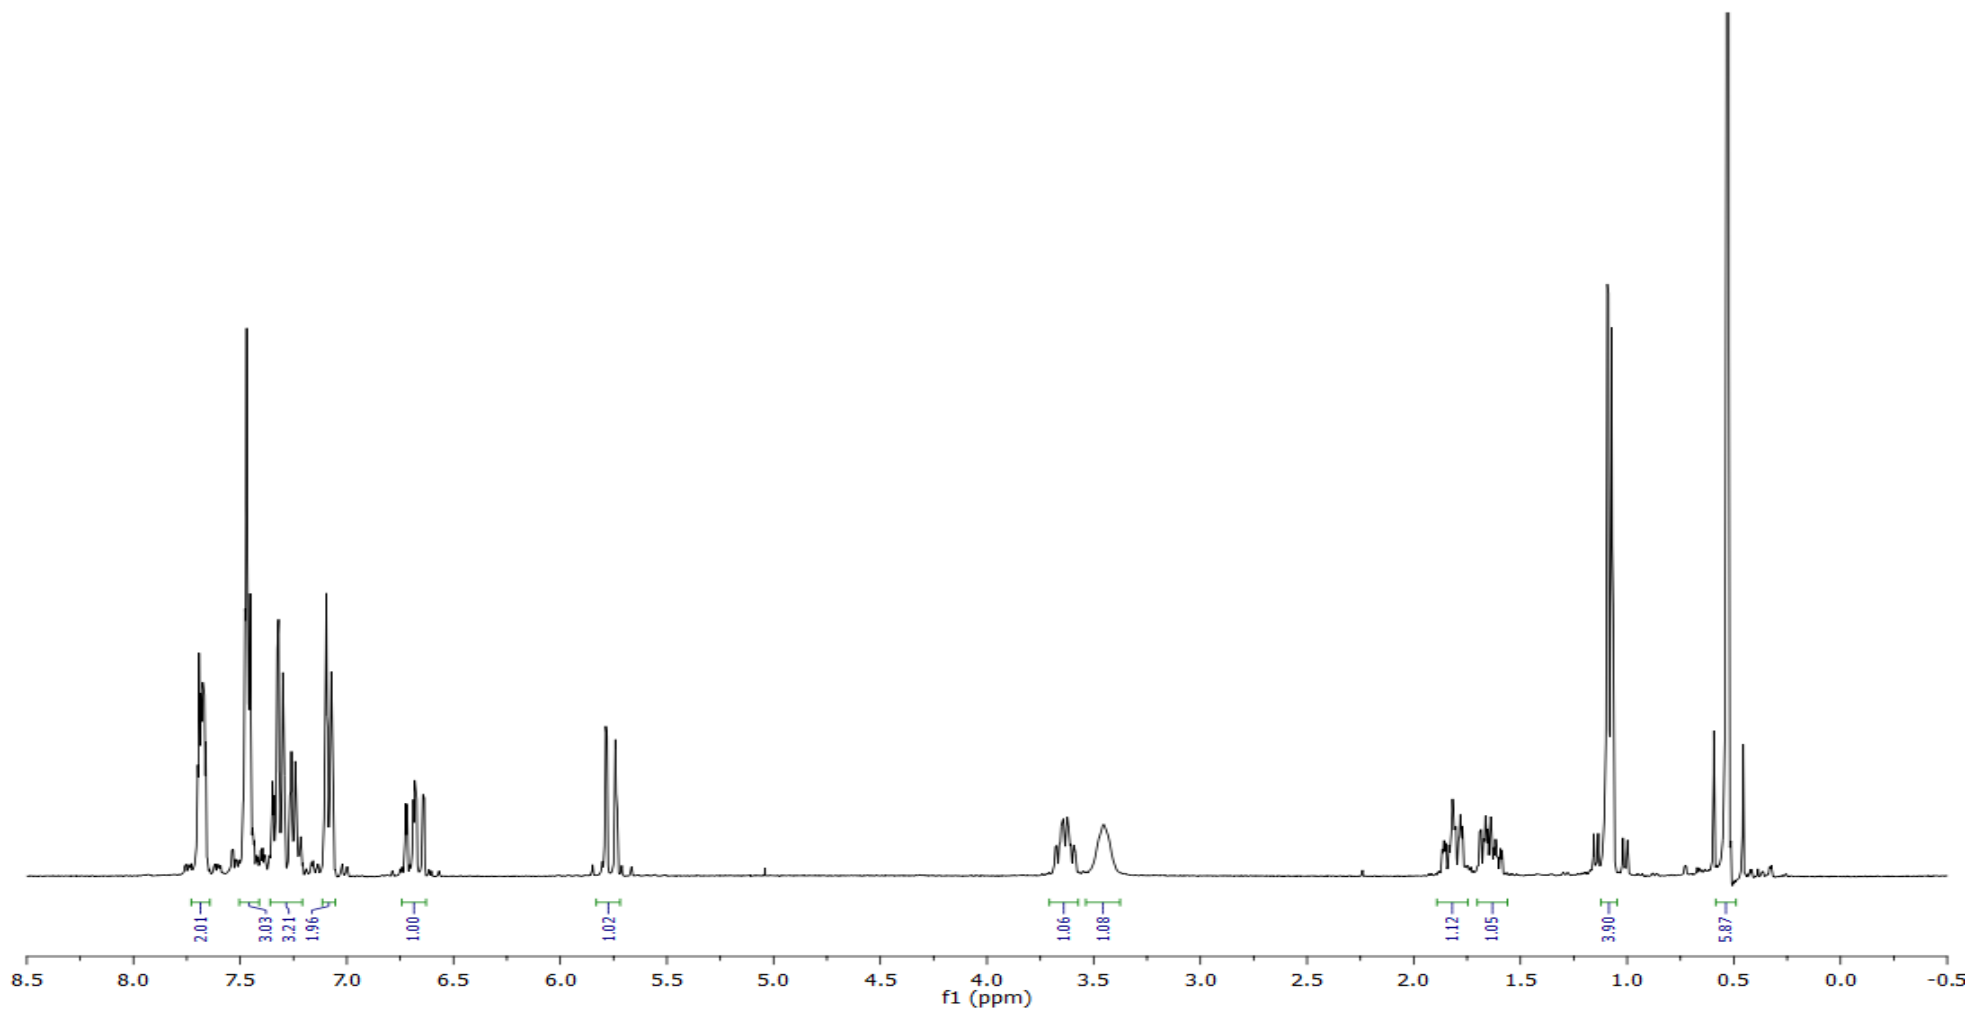

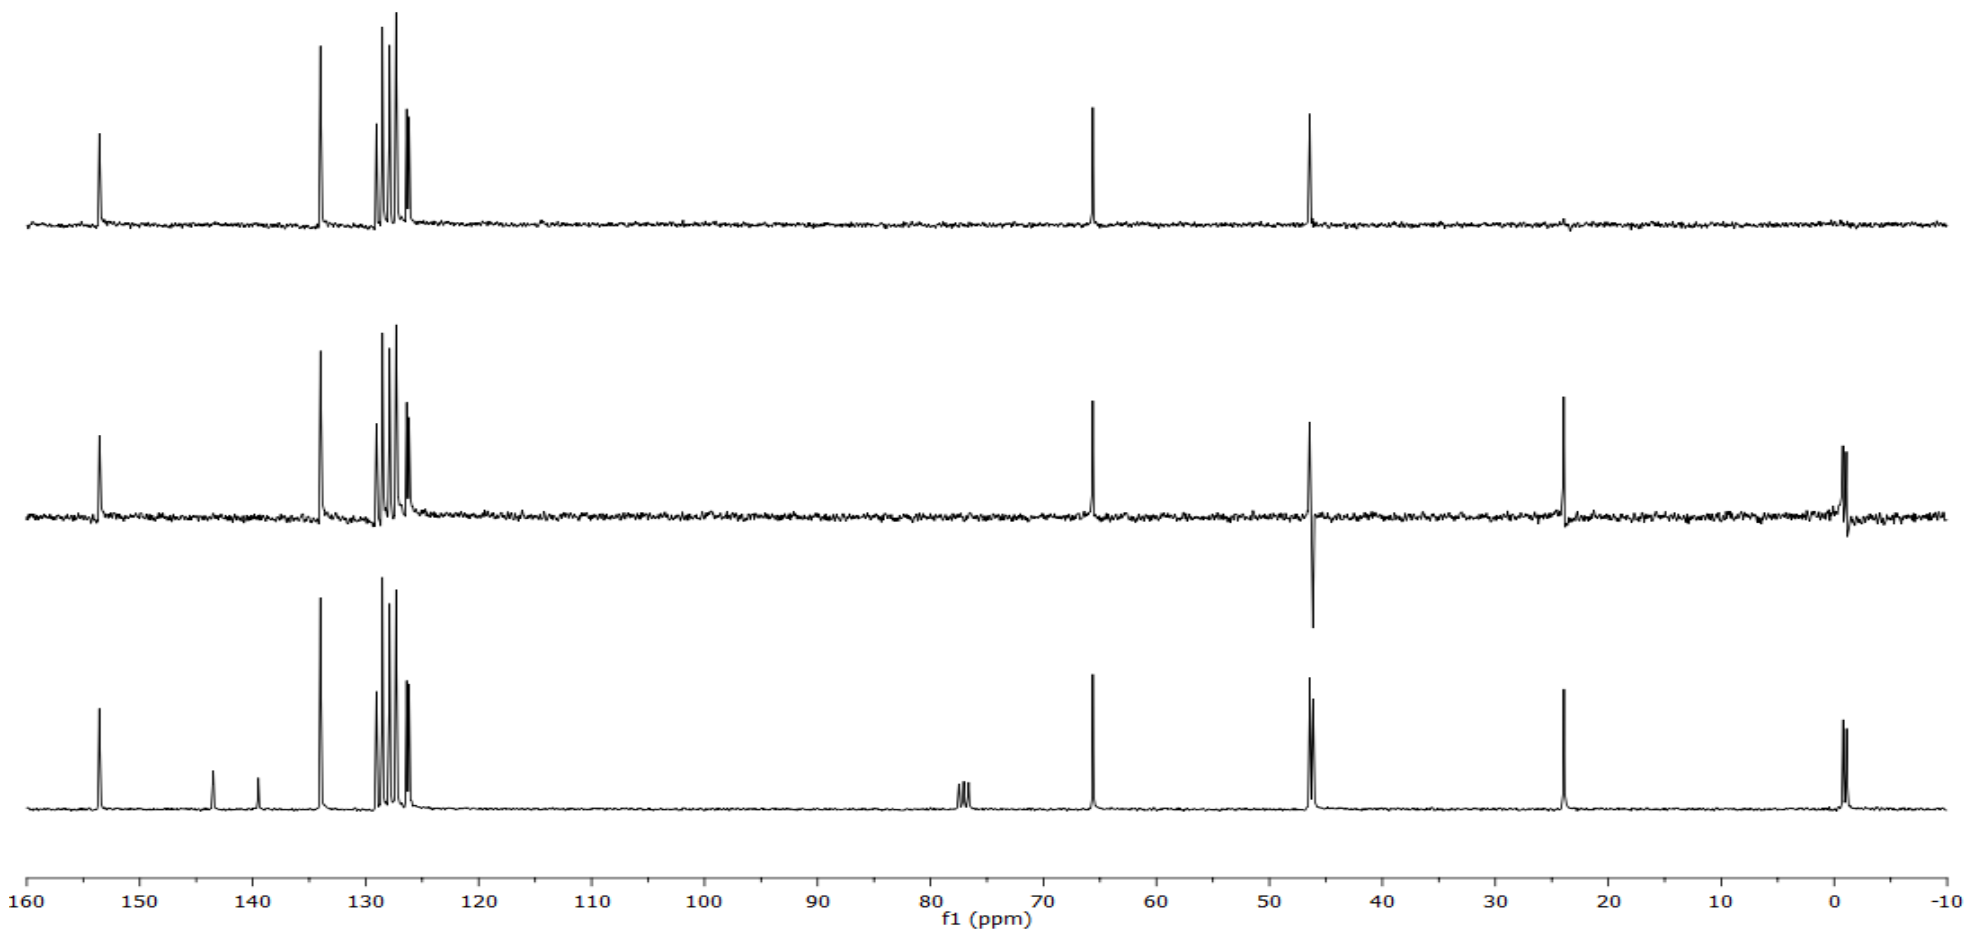

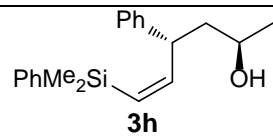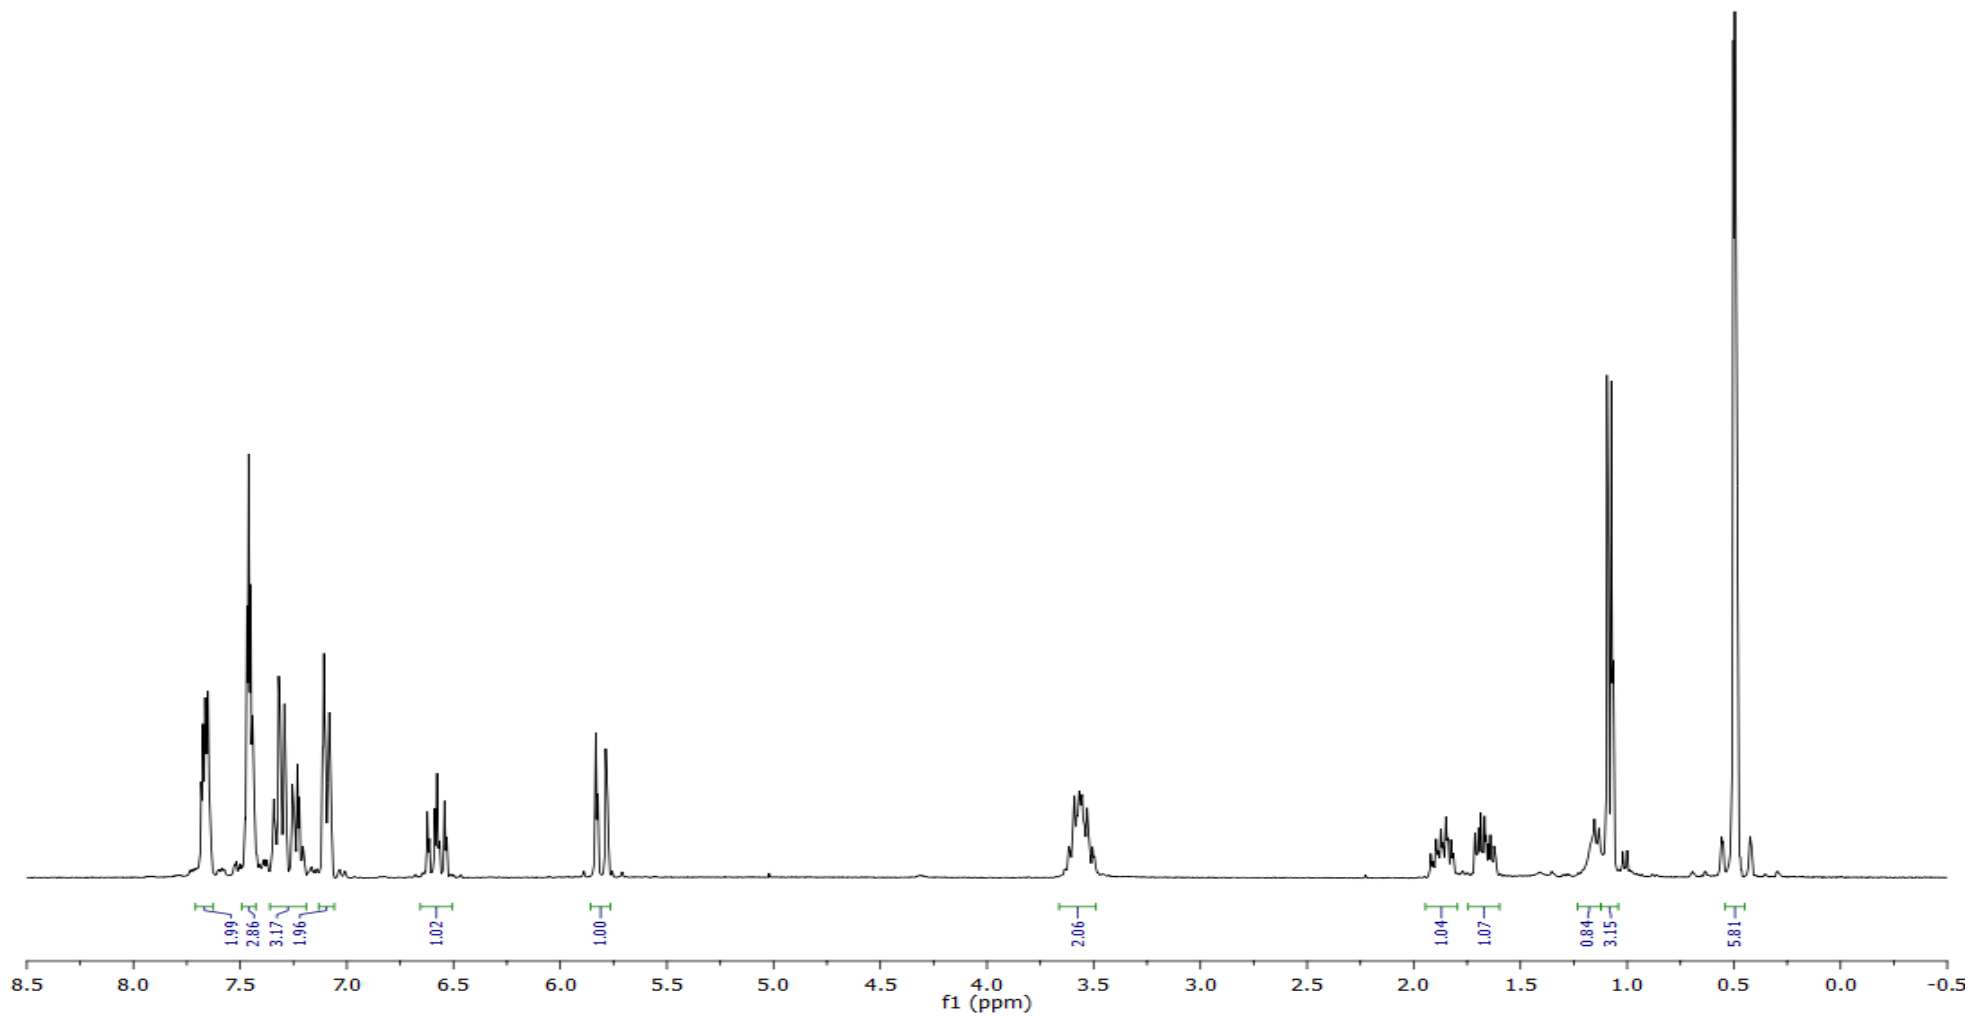



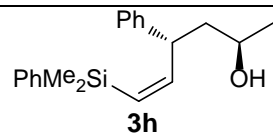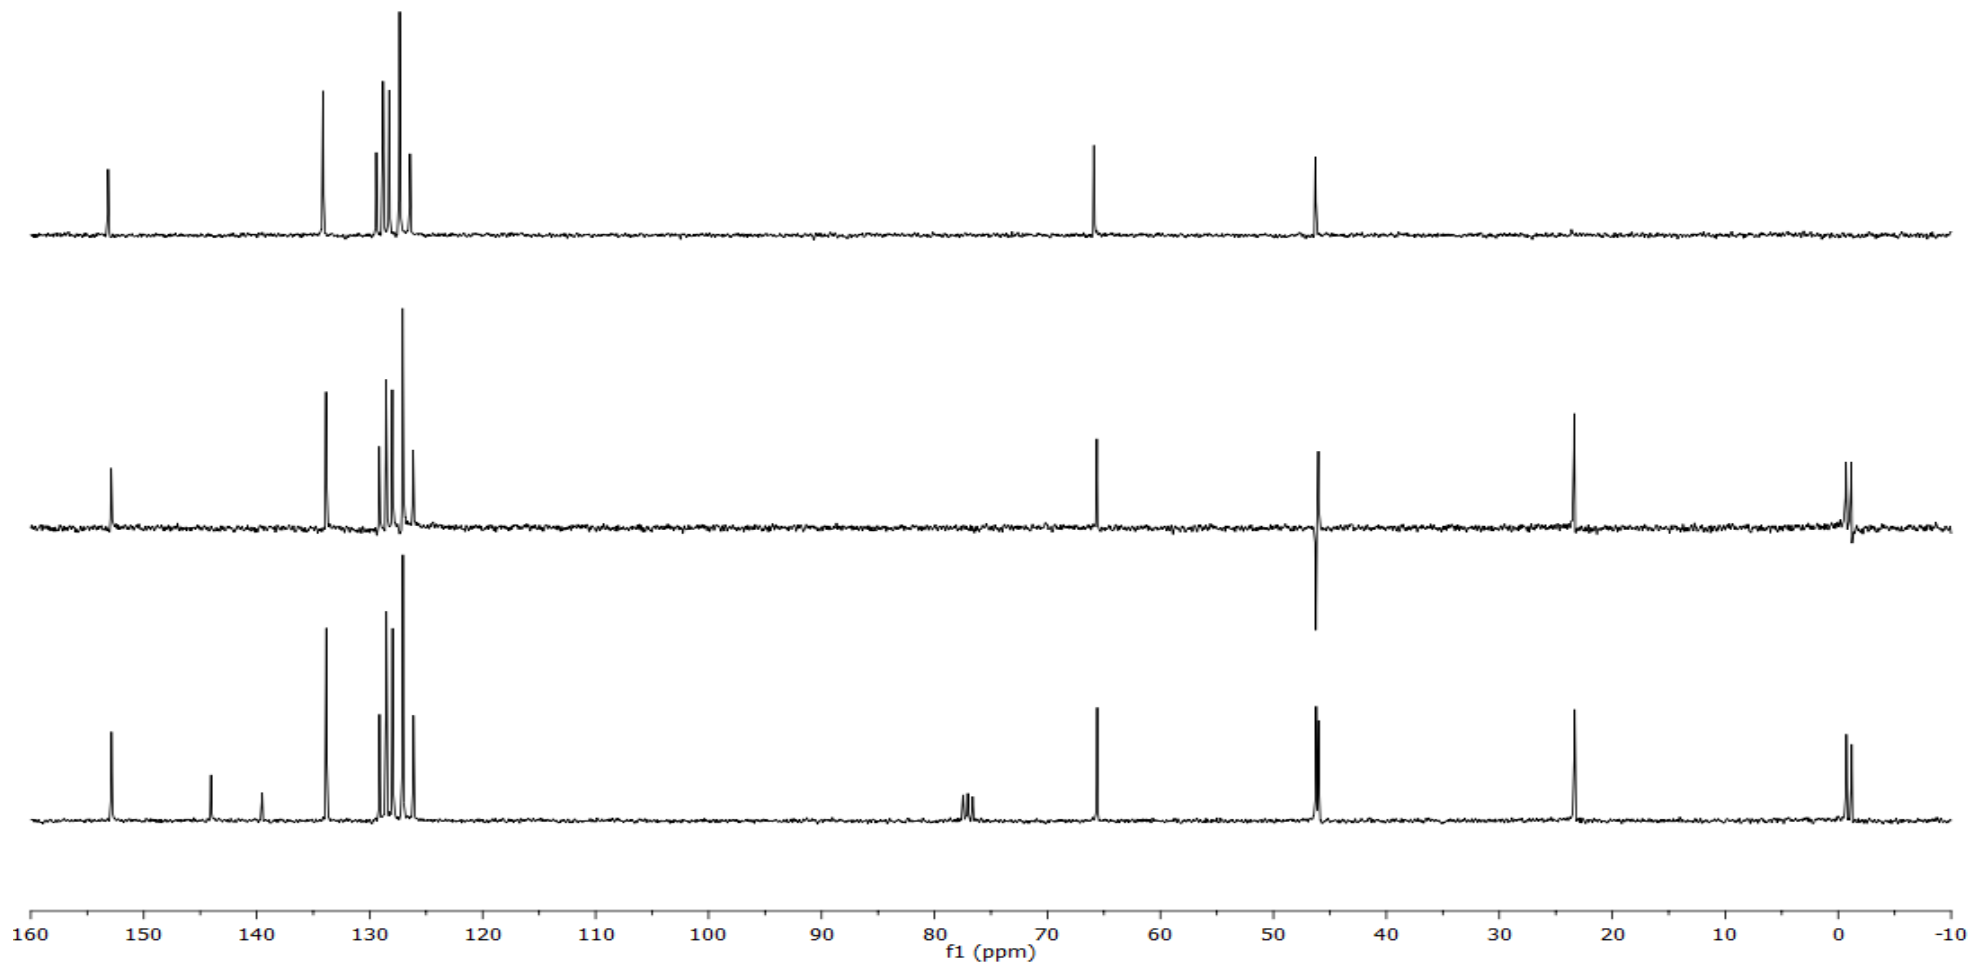

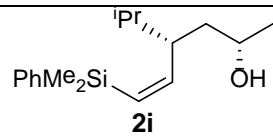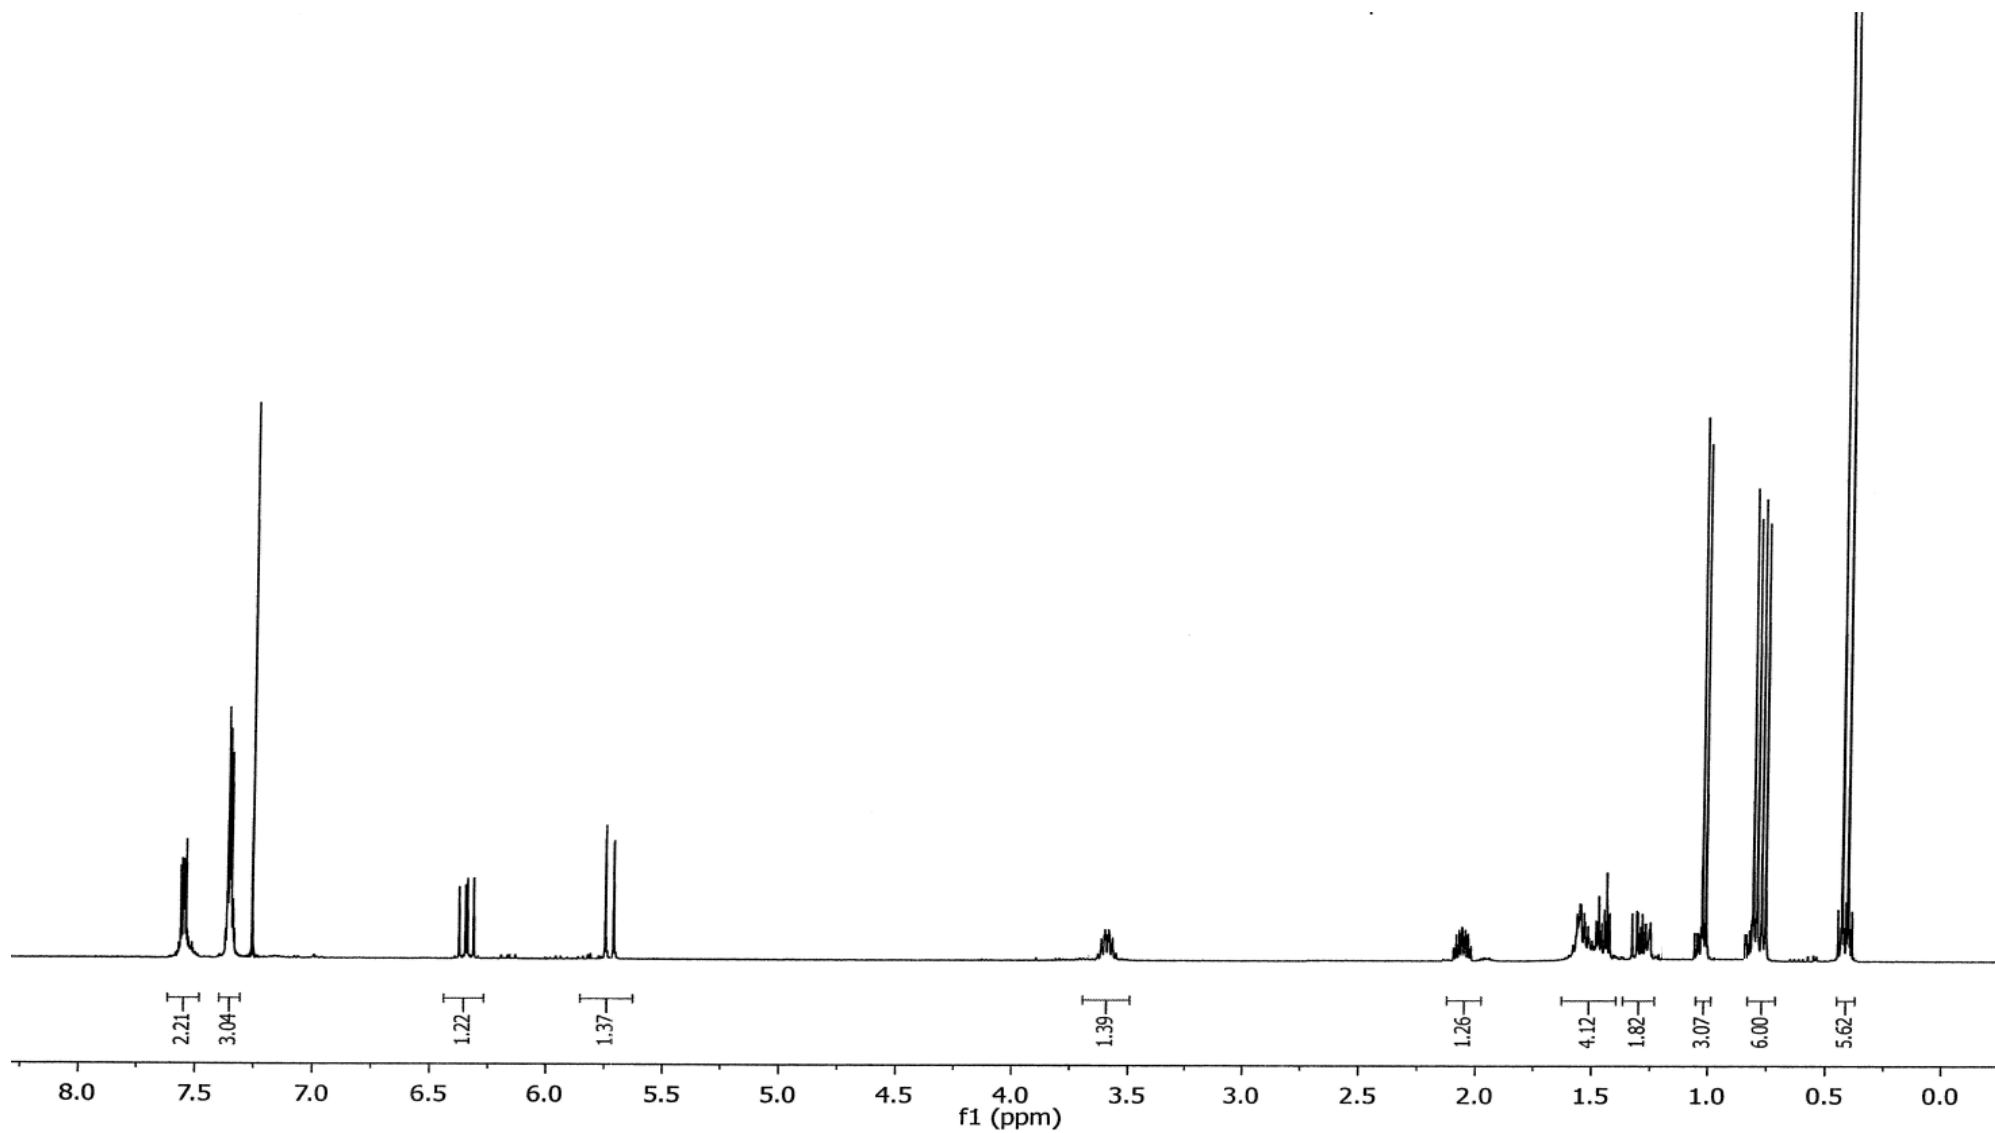

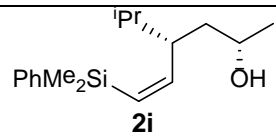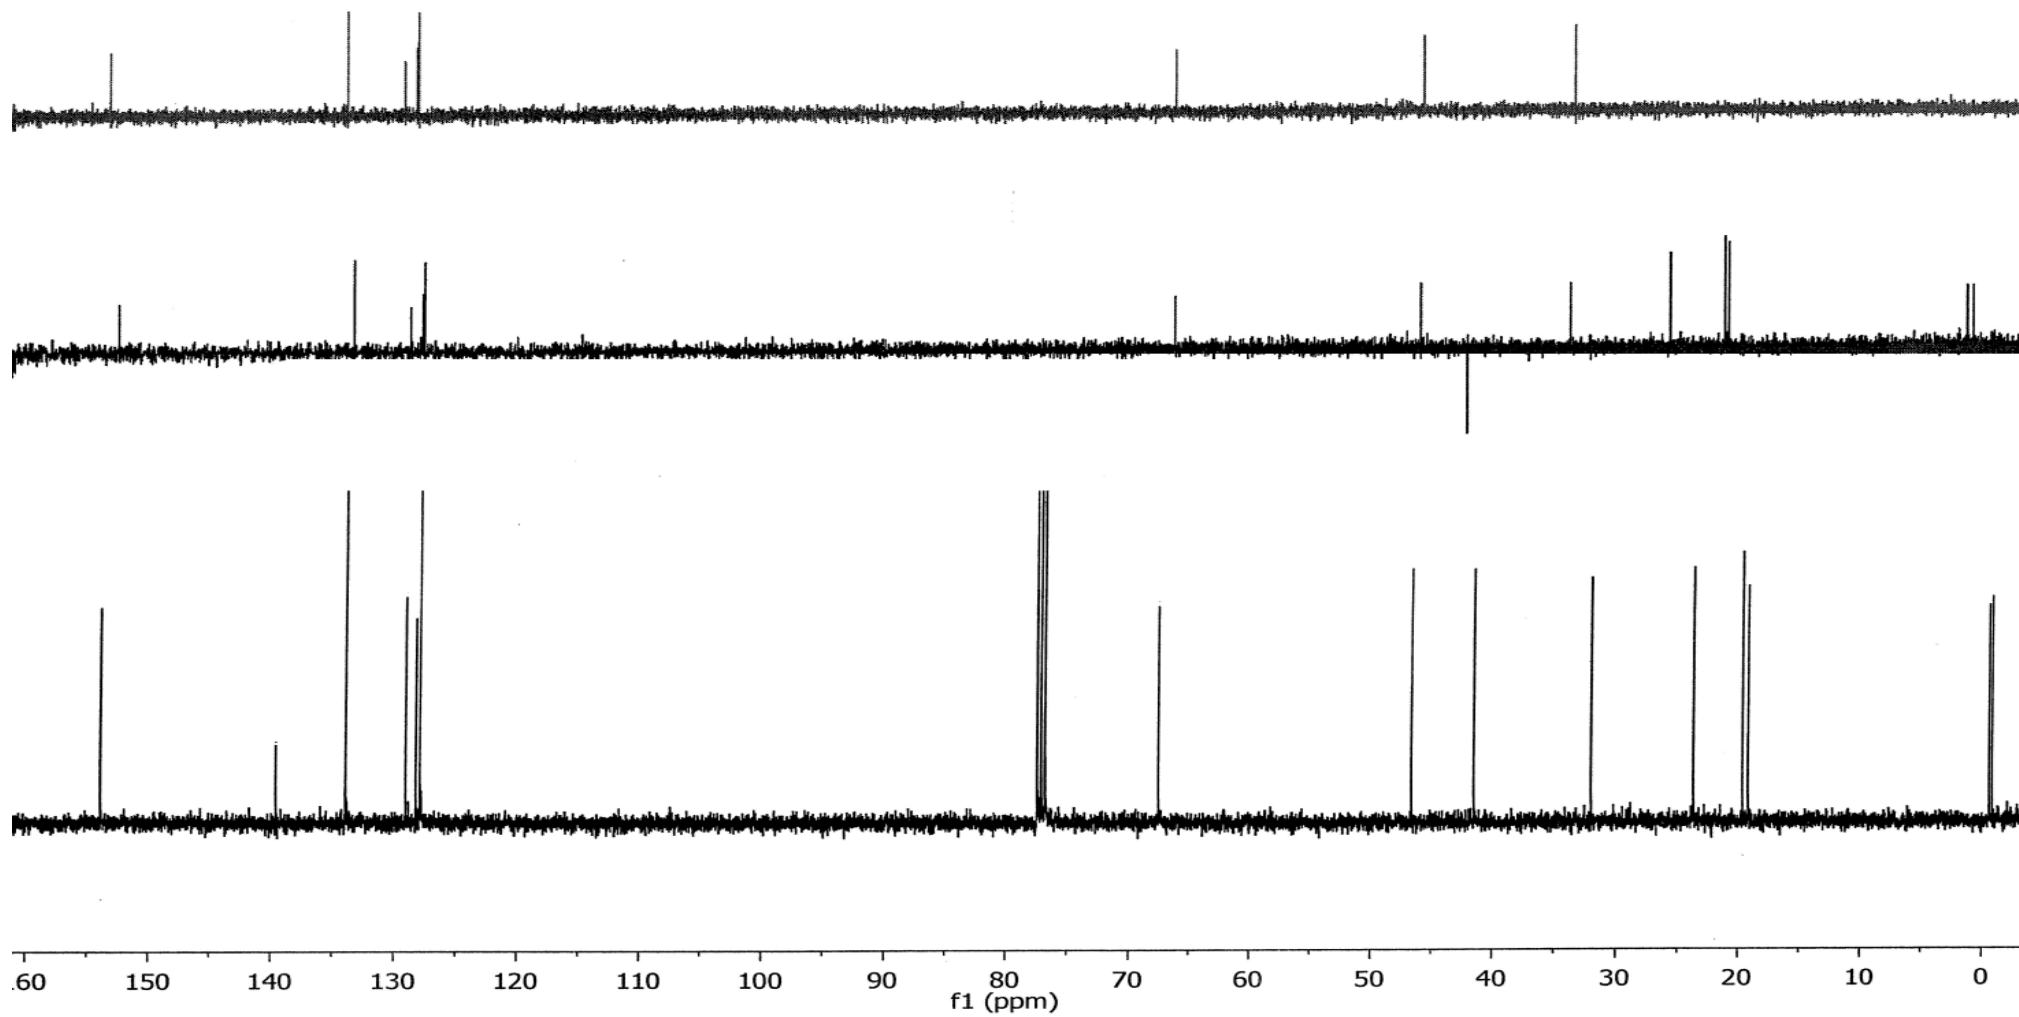

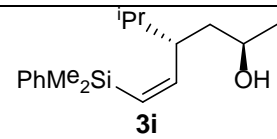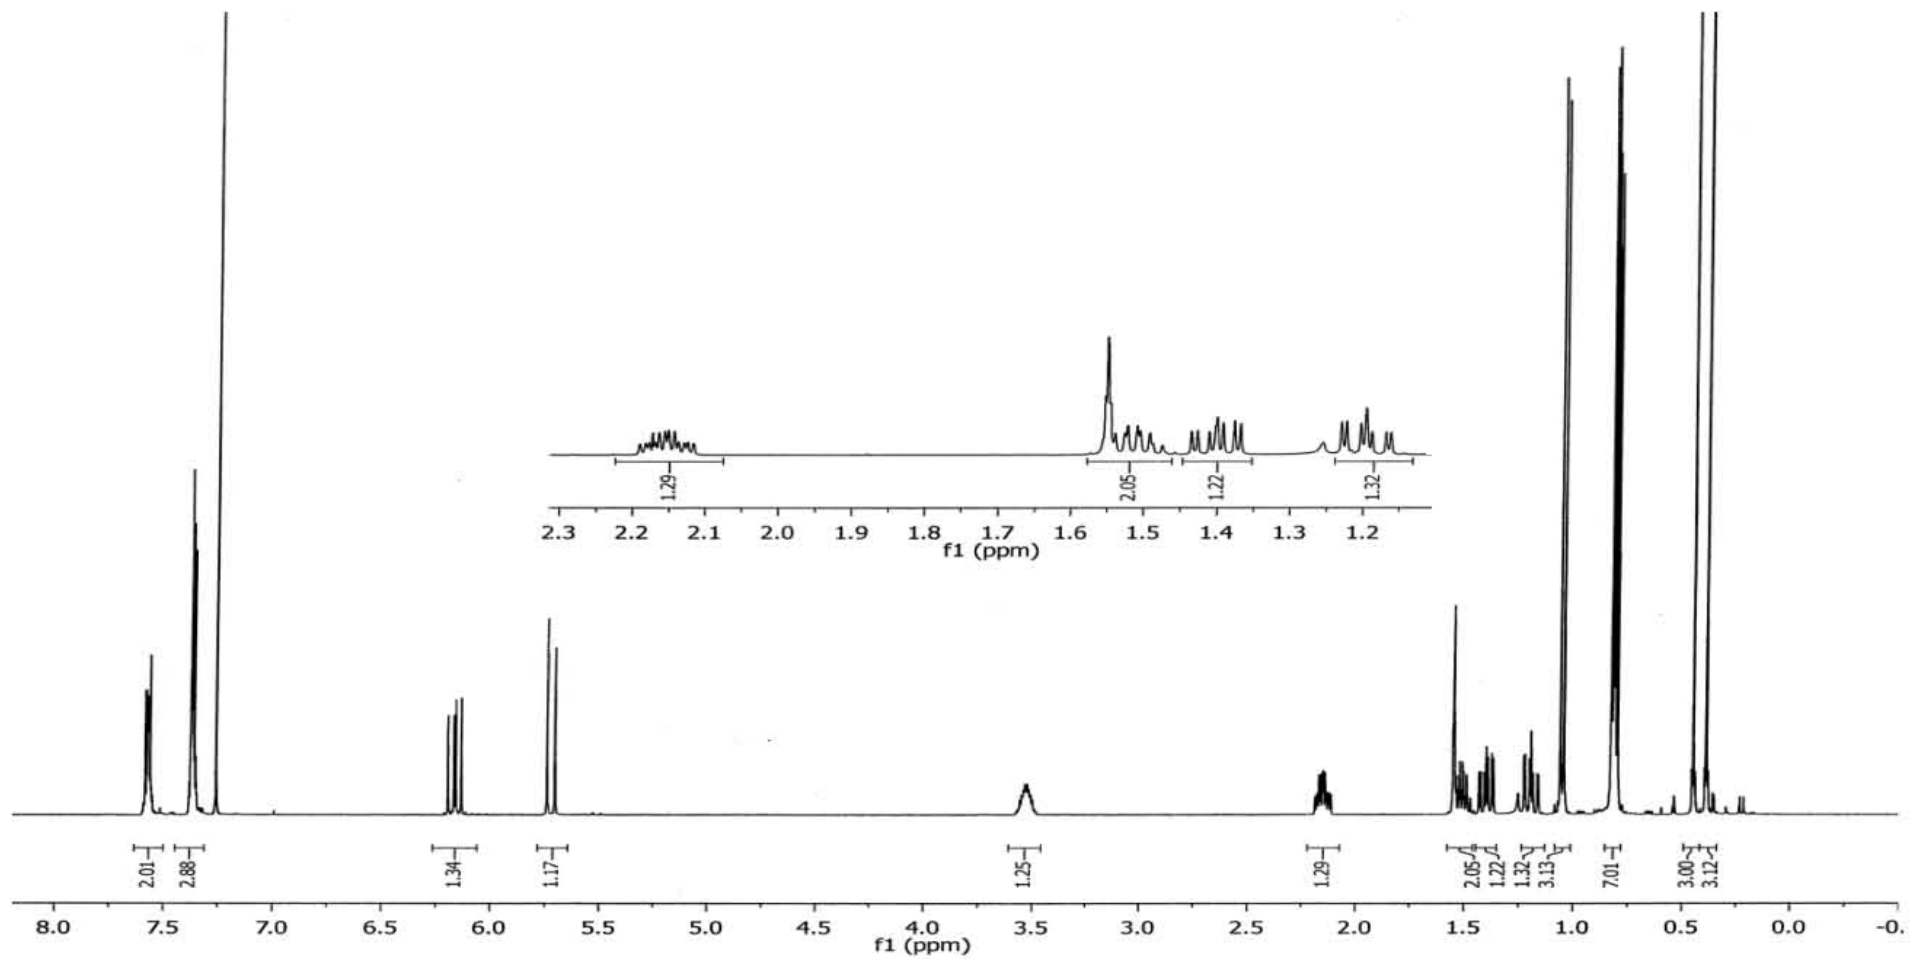

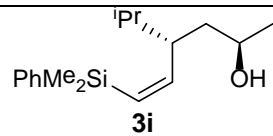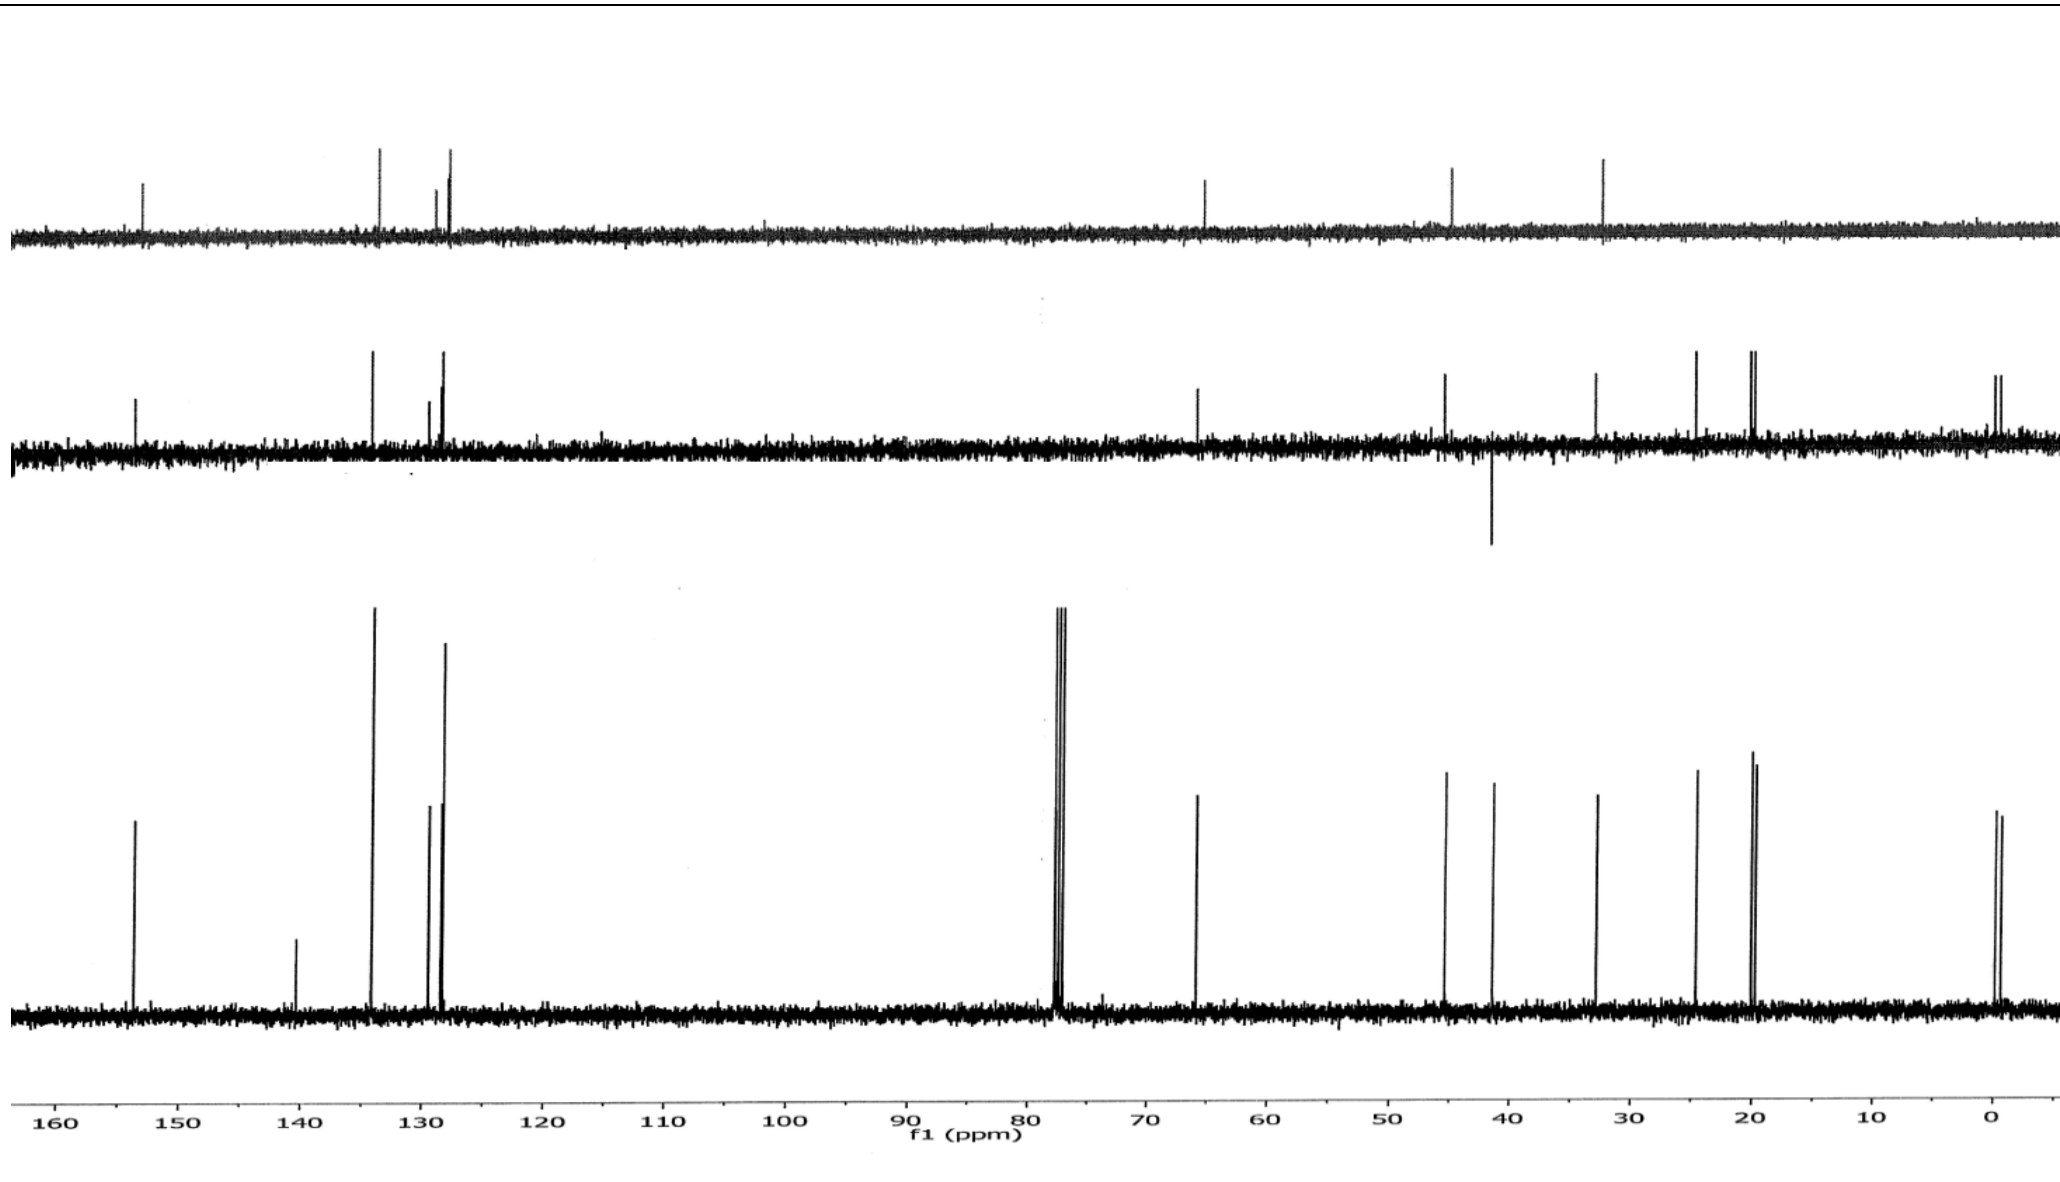

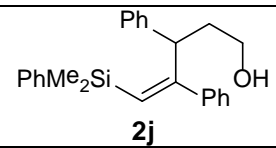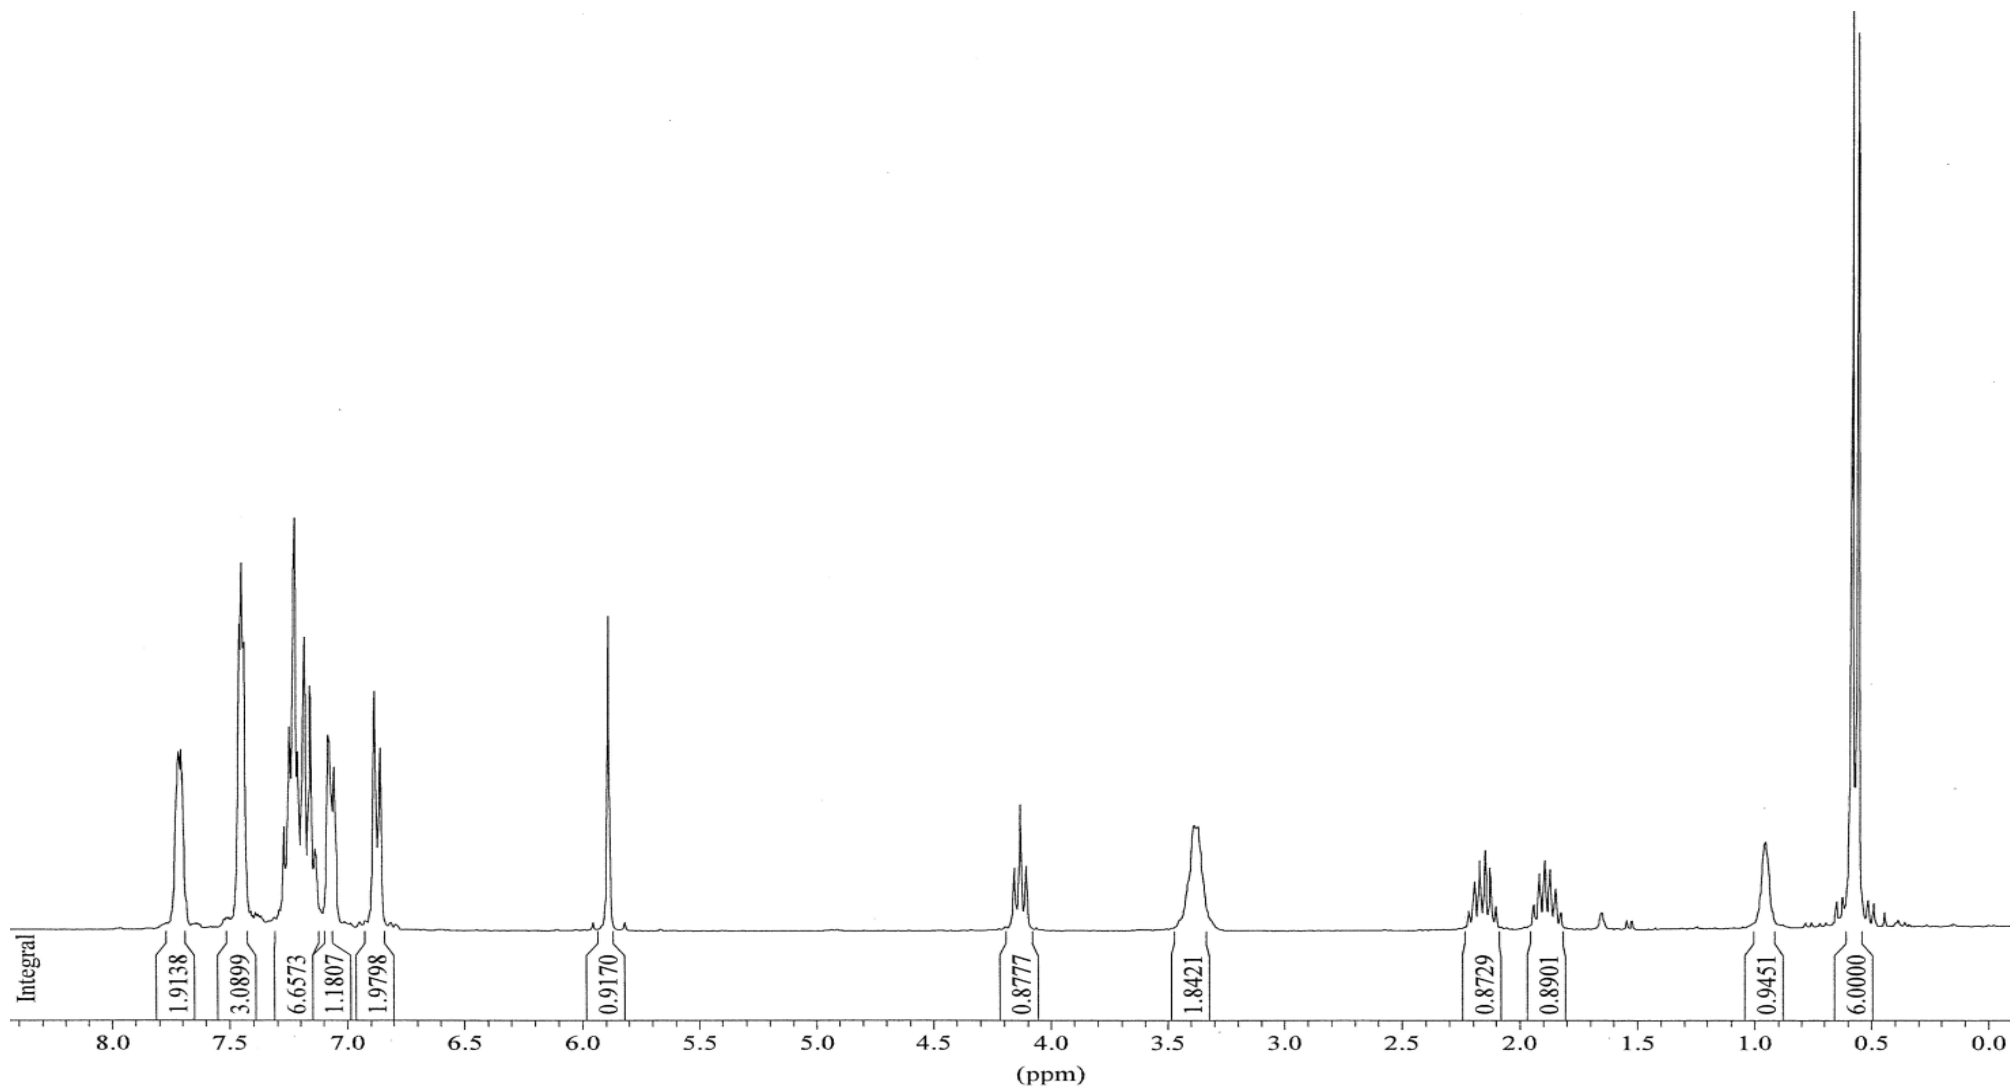

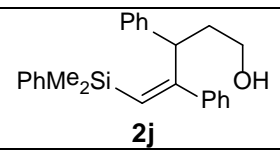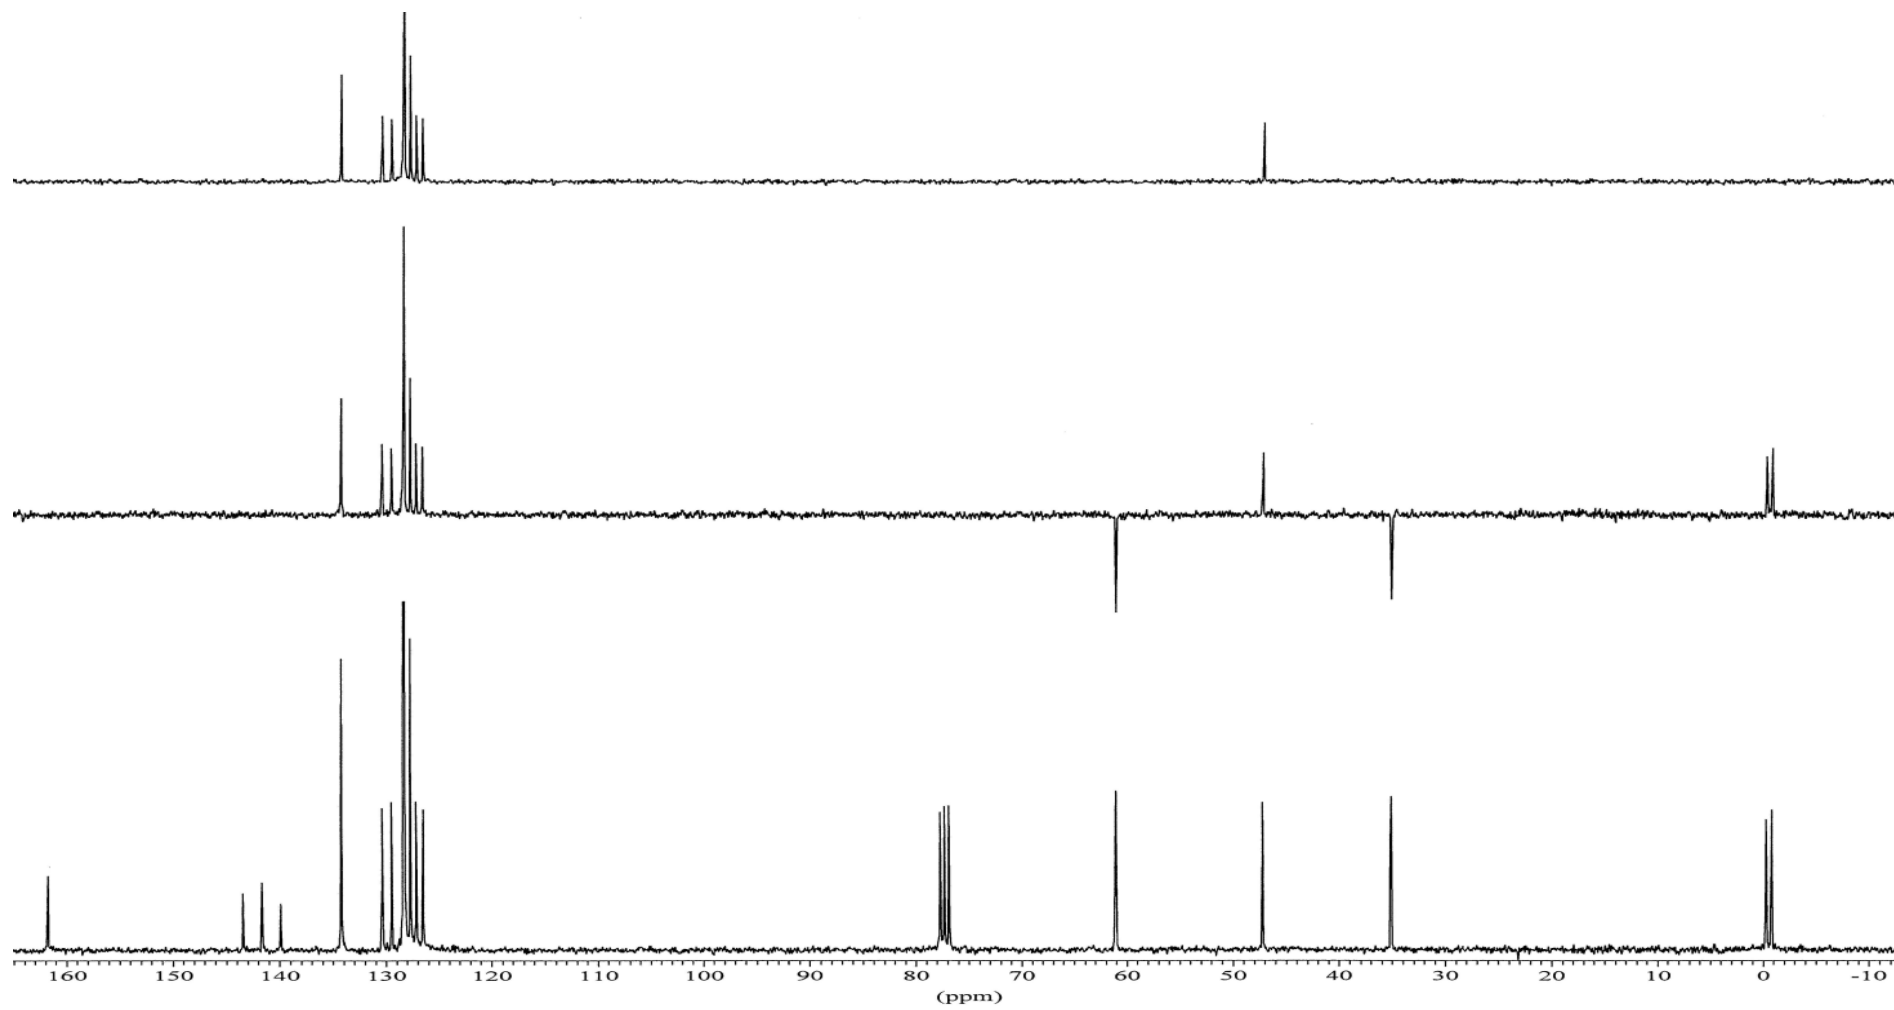

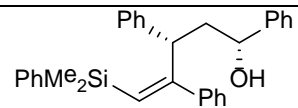

**2k**

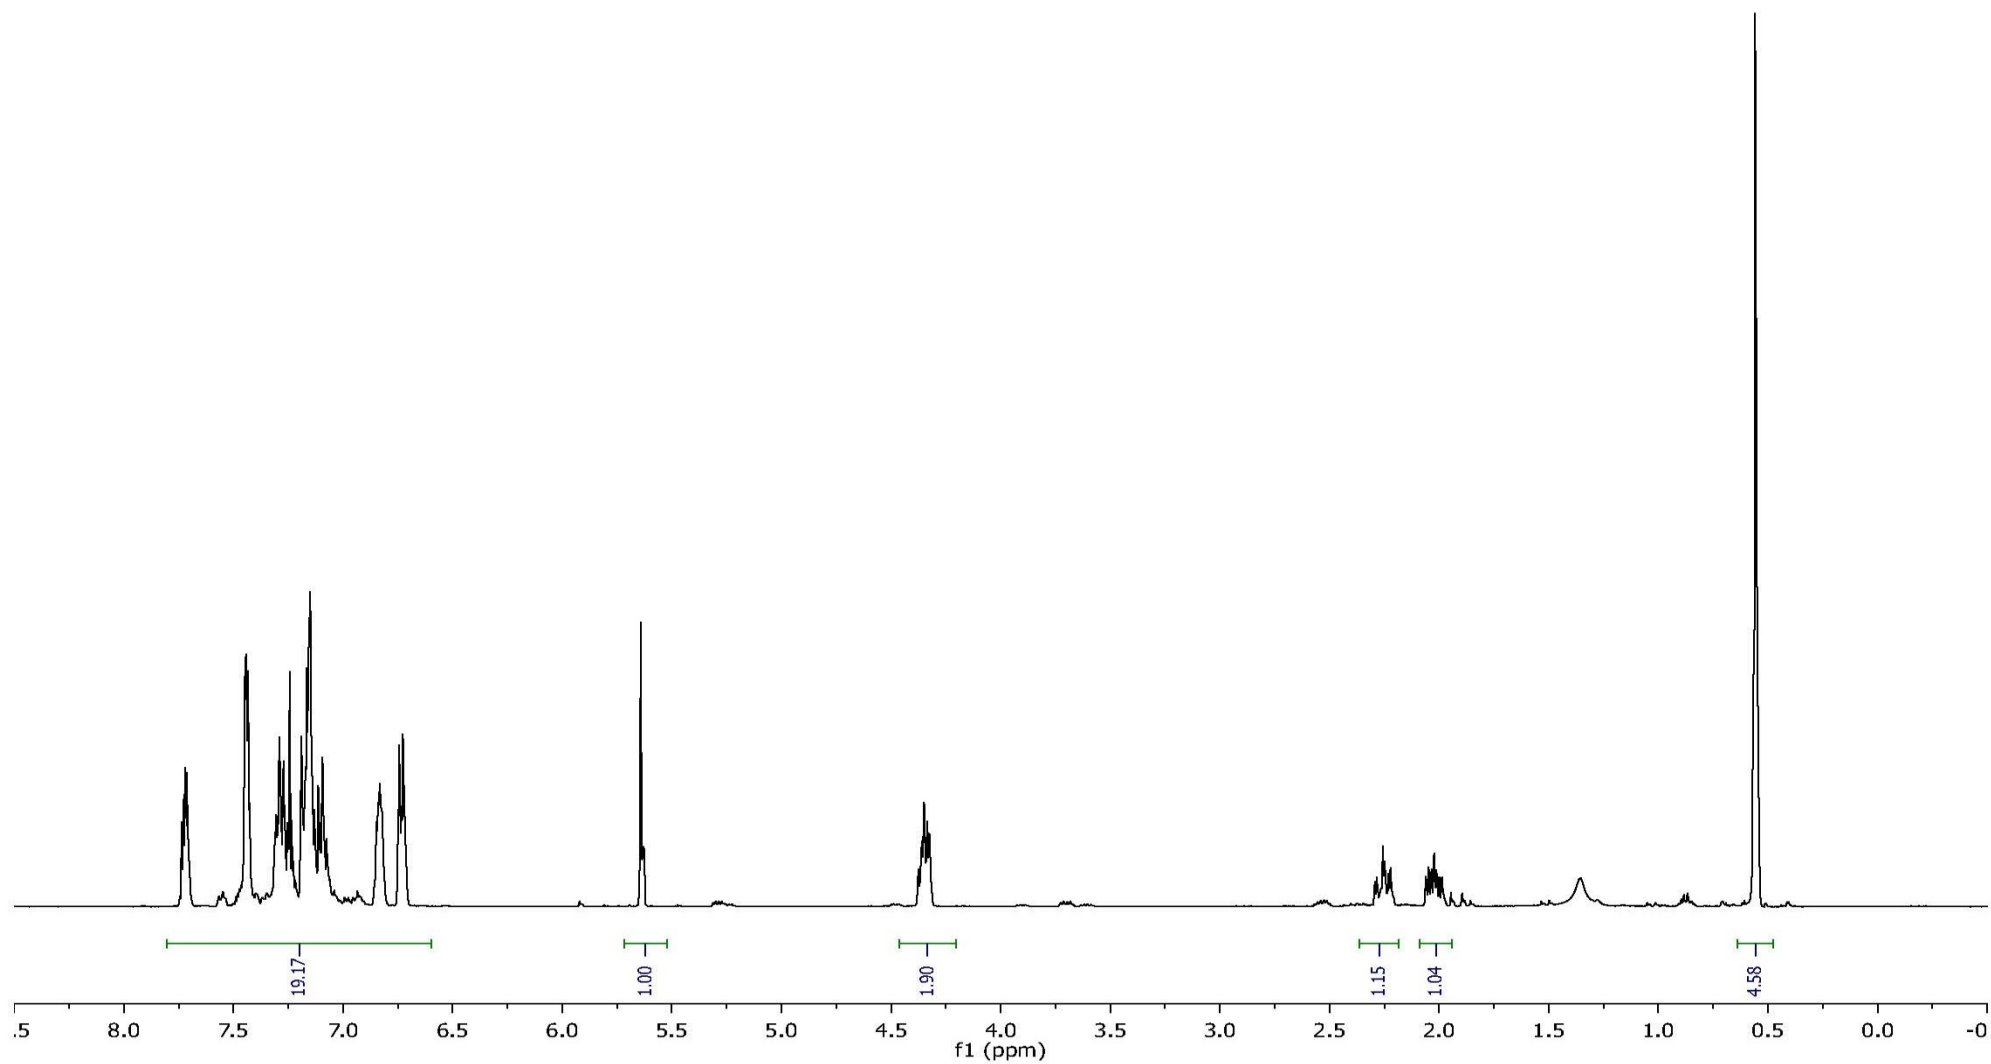



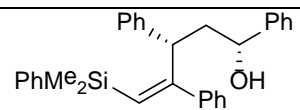

2k

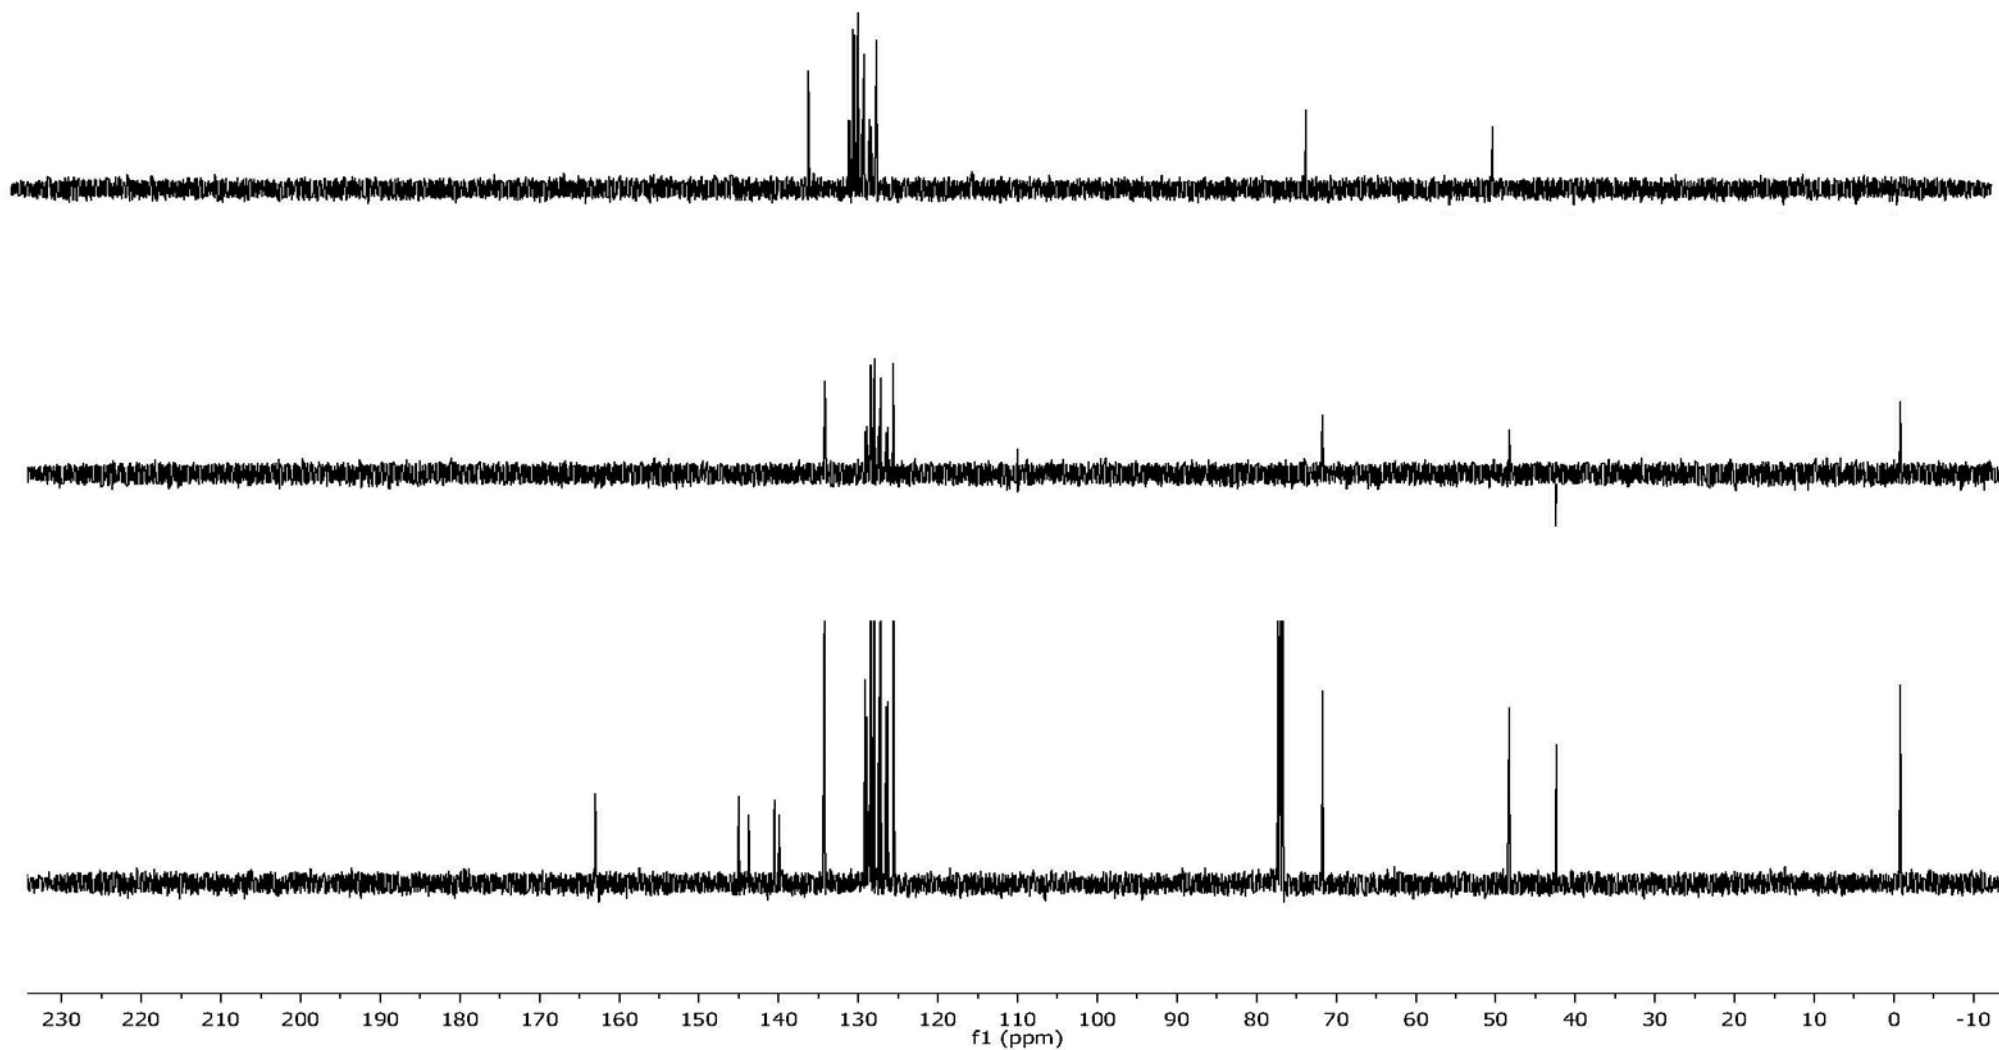

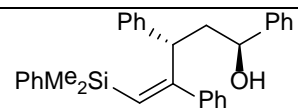

**3k**

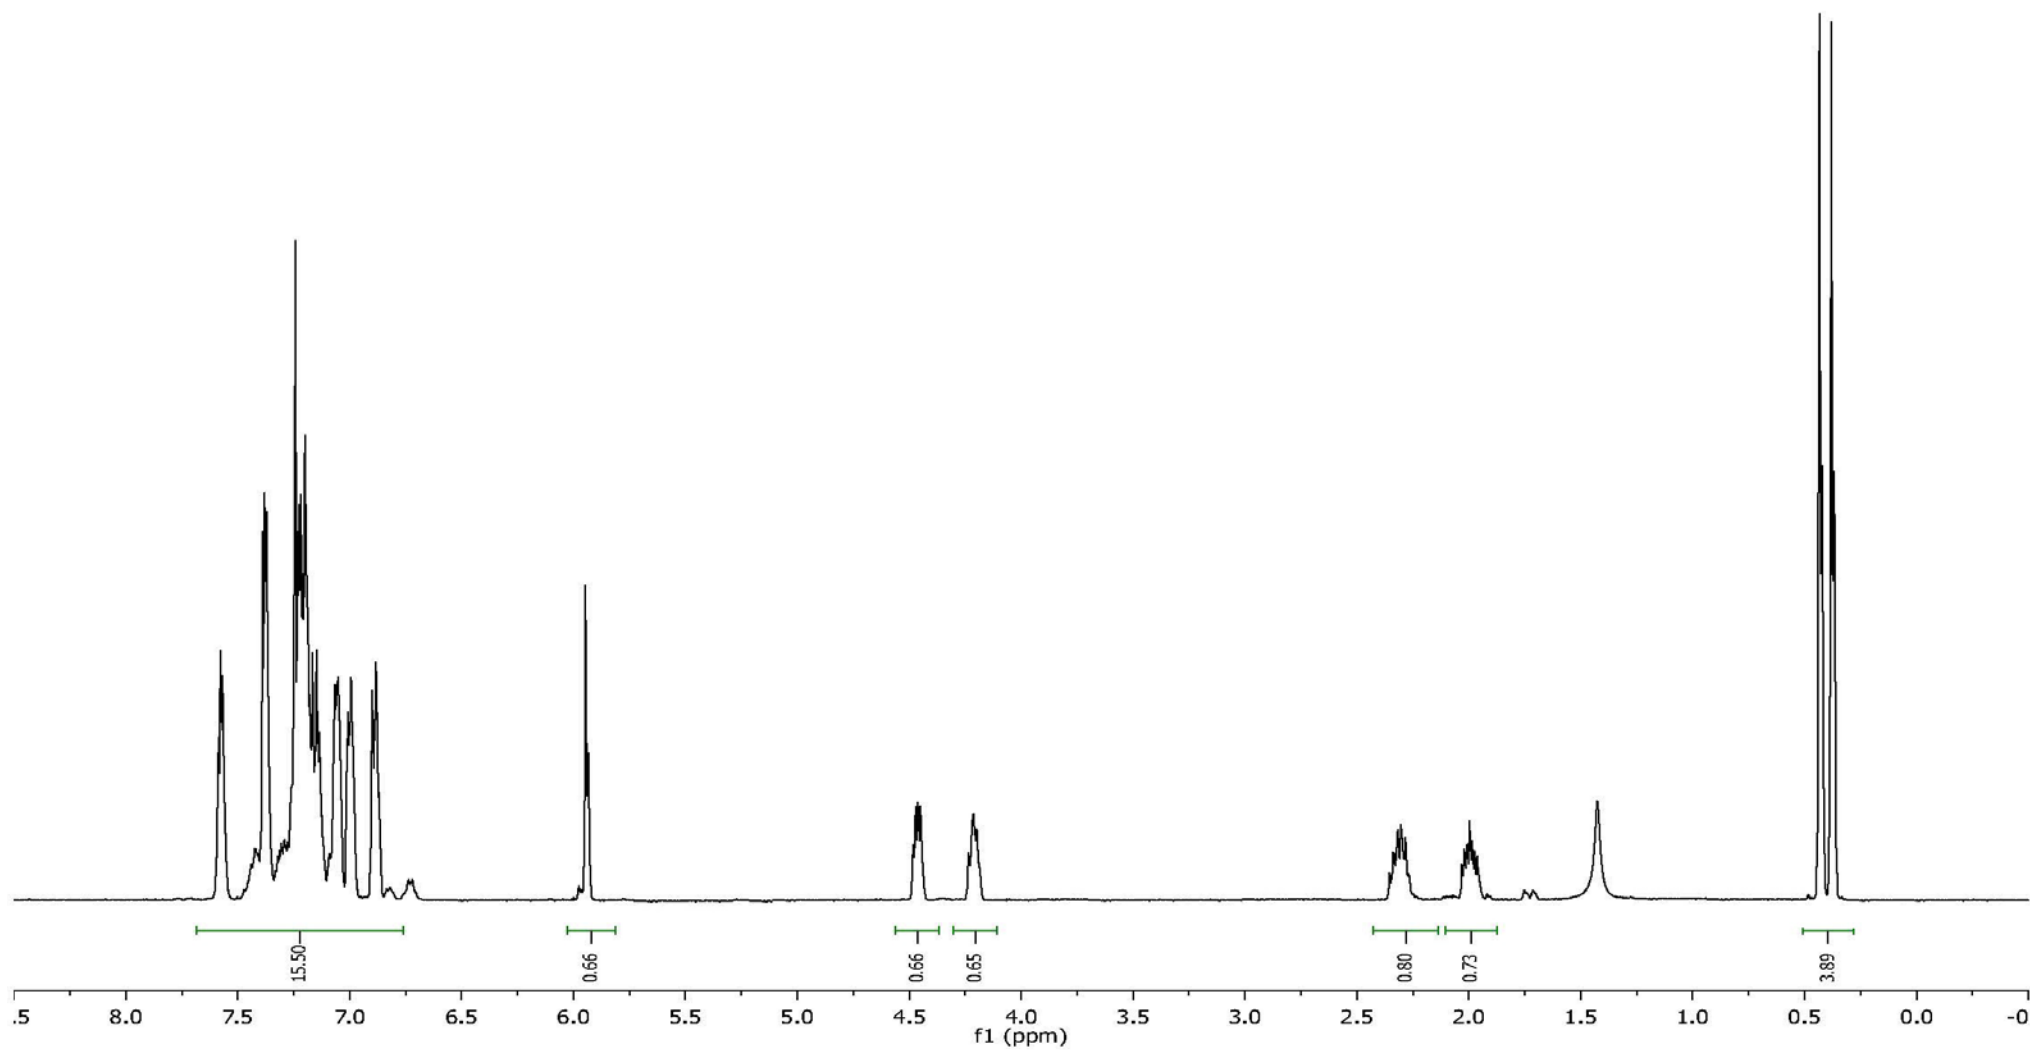



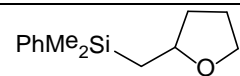

**4a**

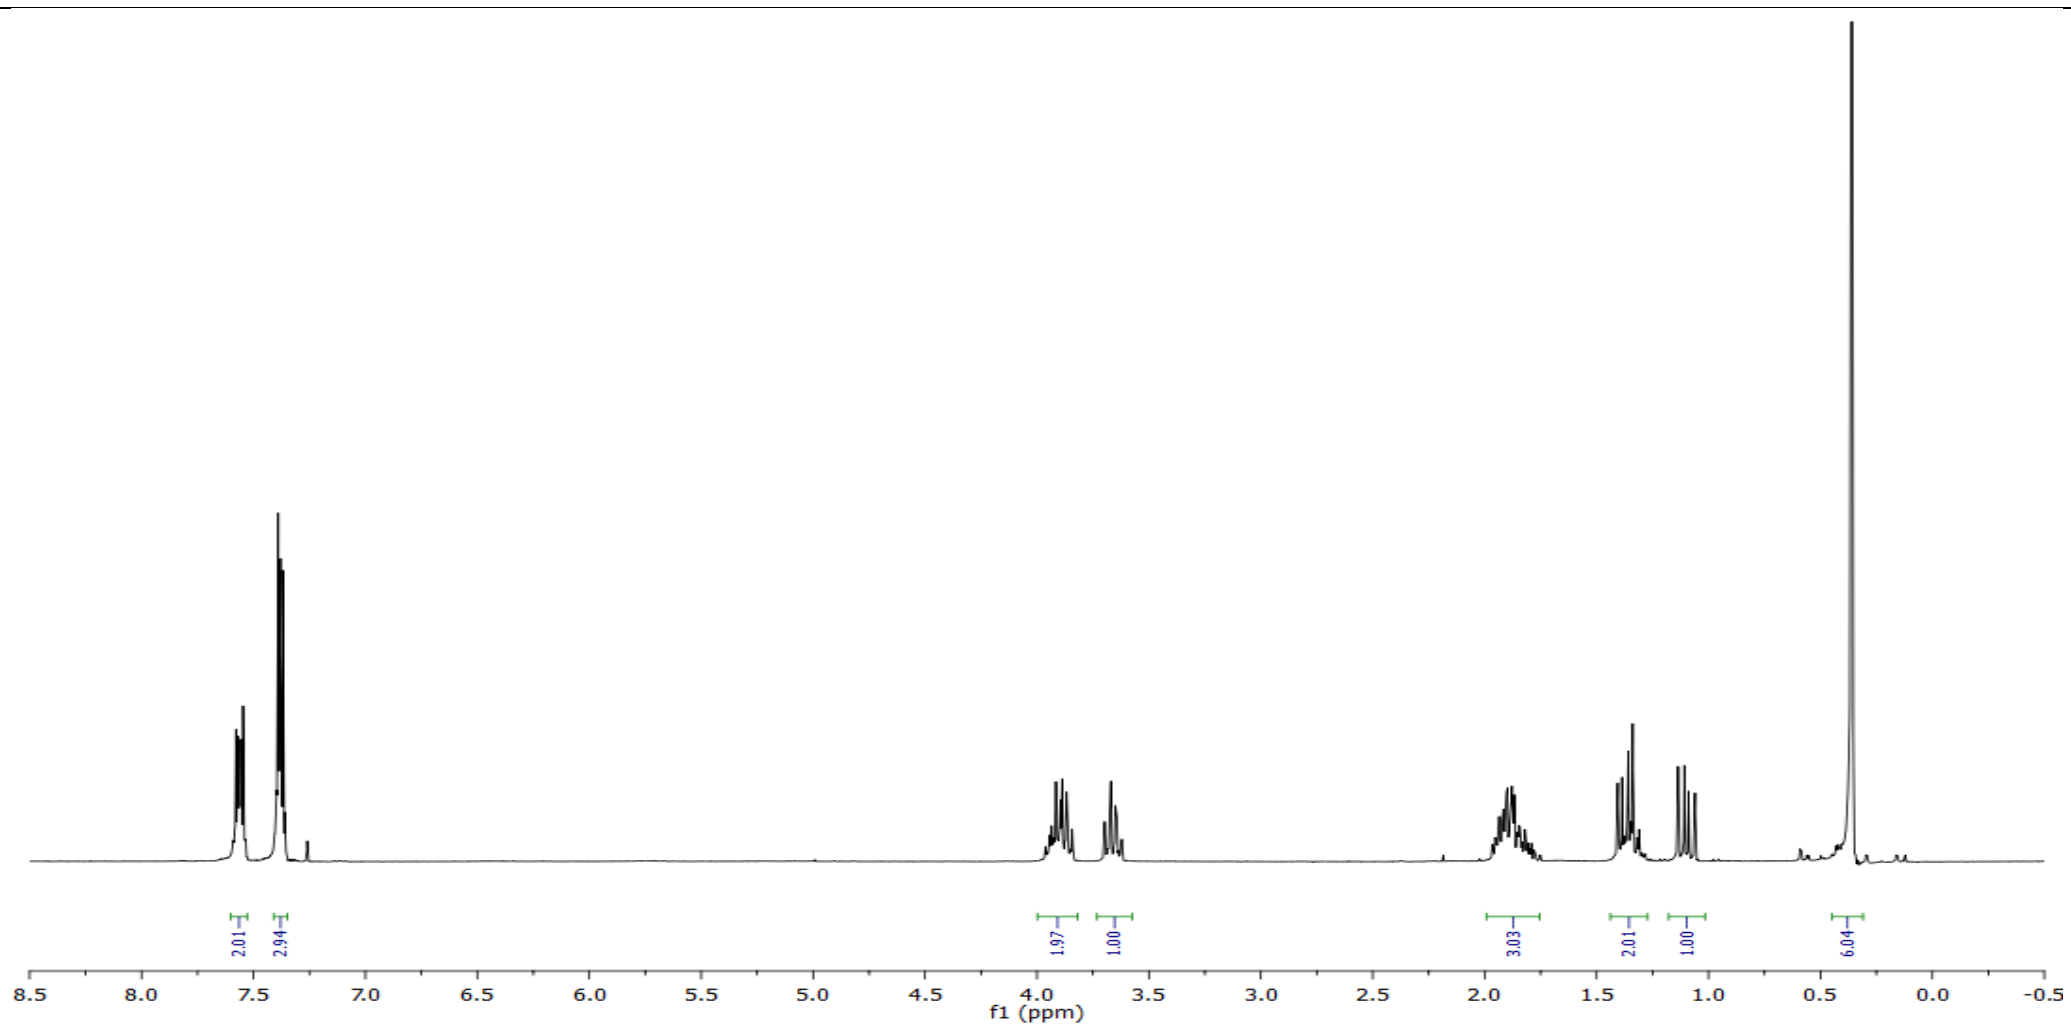

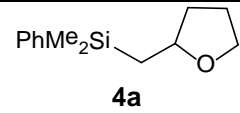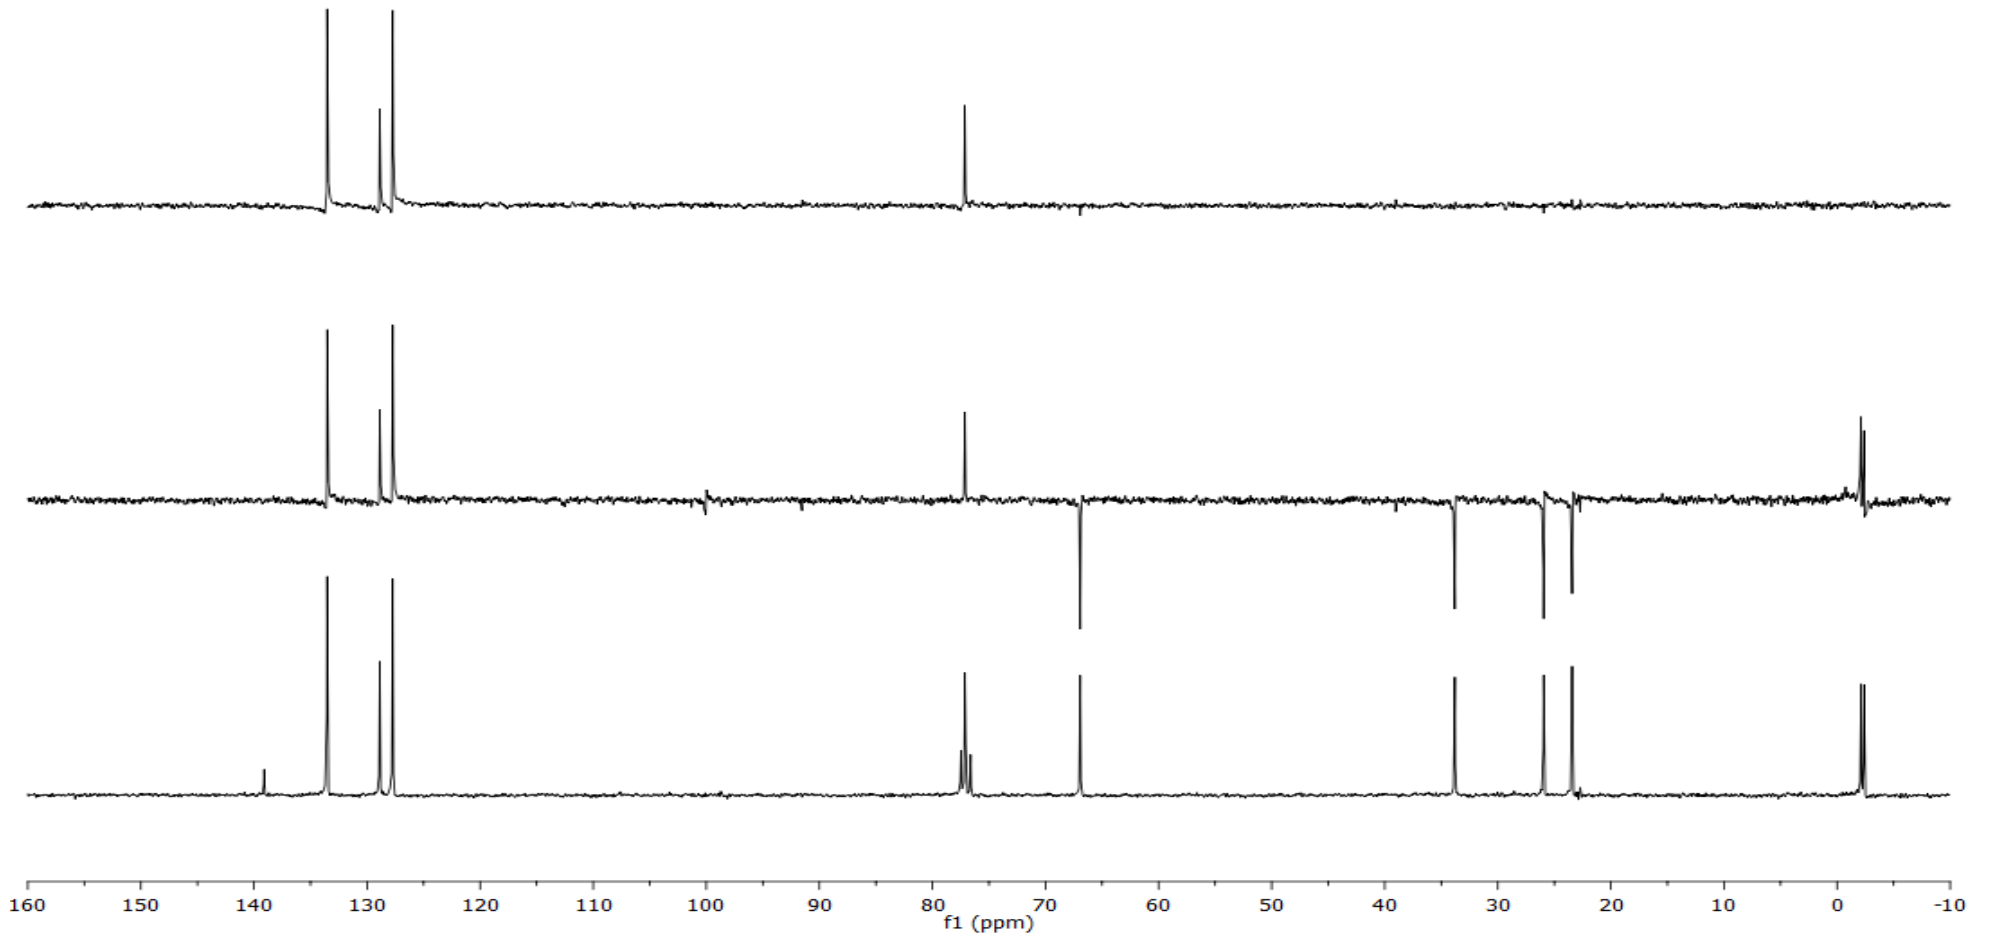

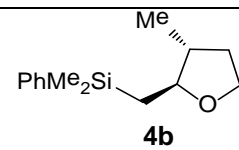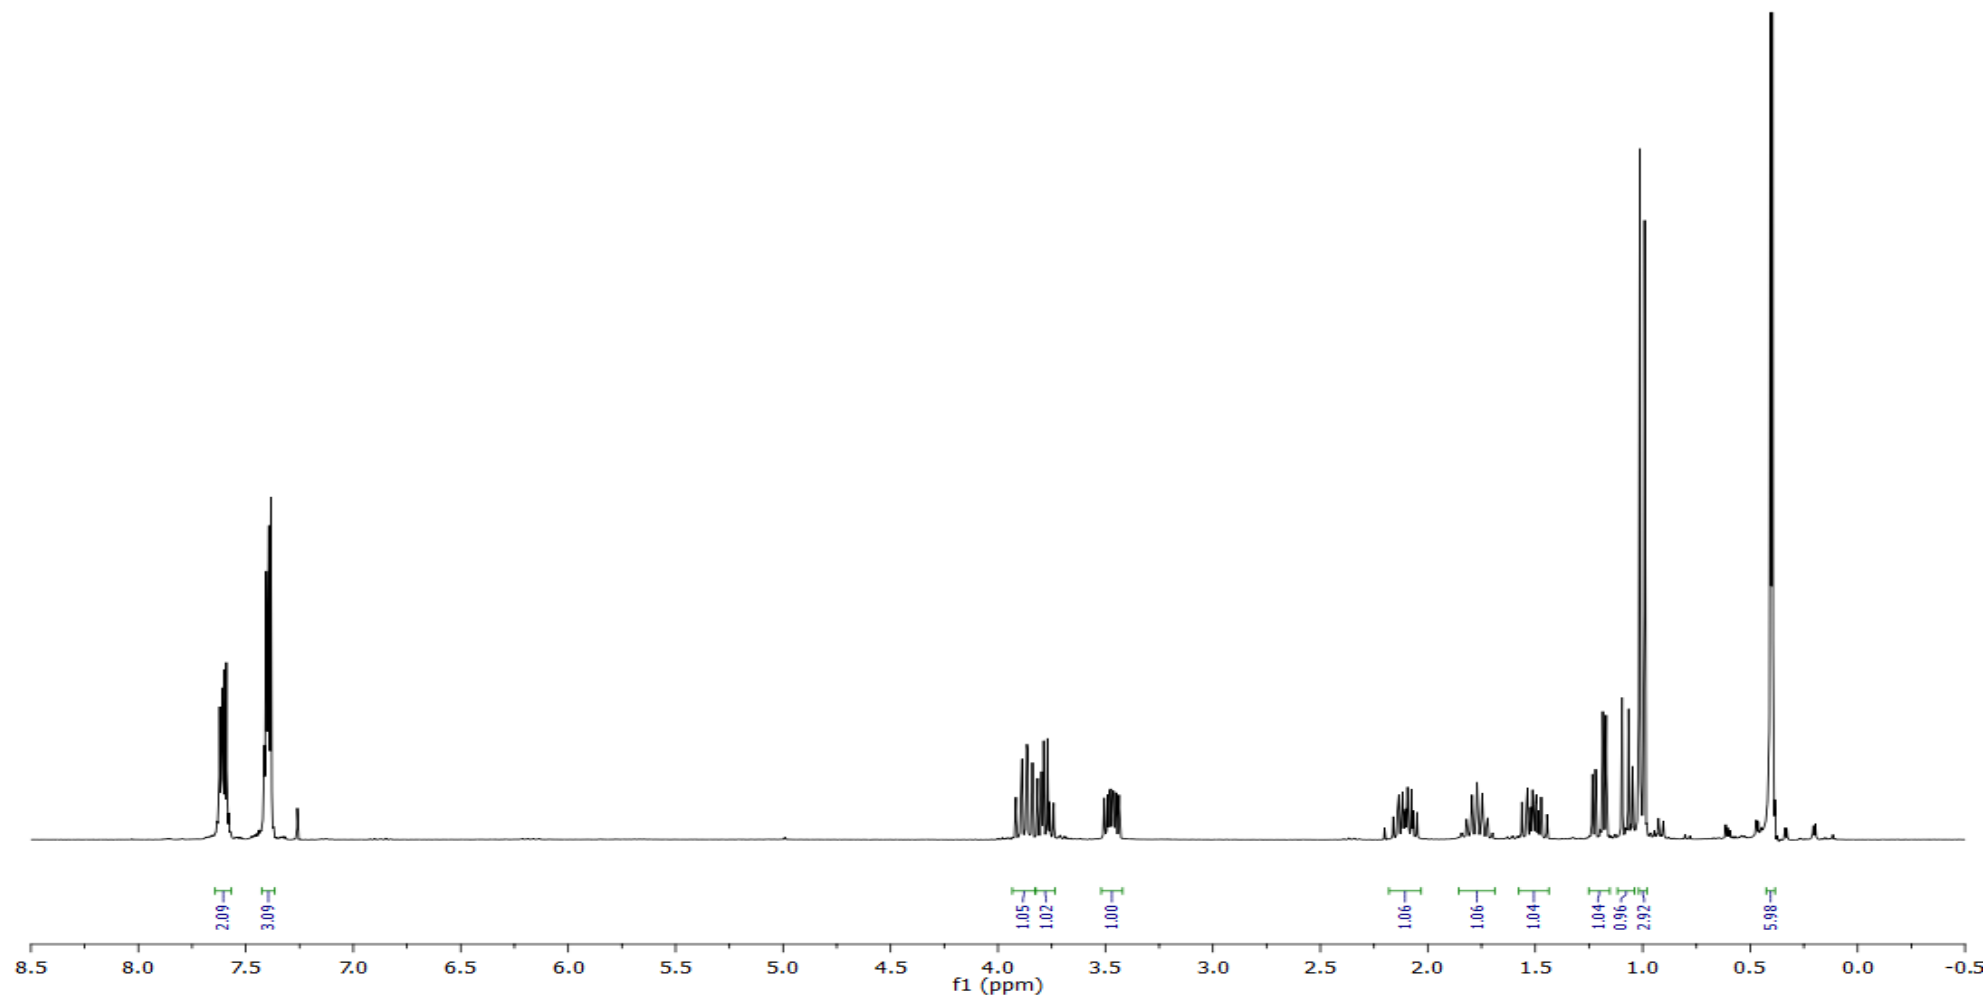

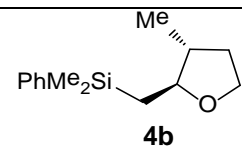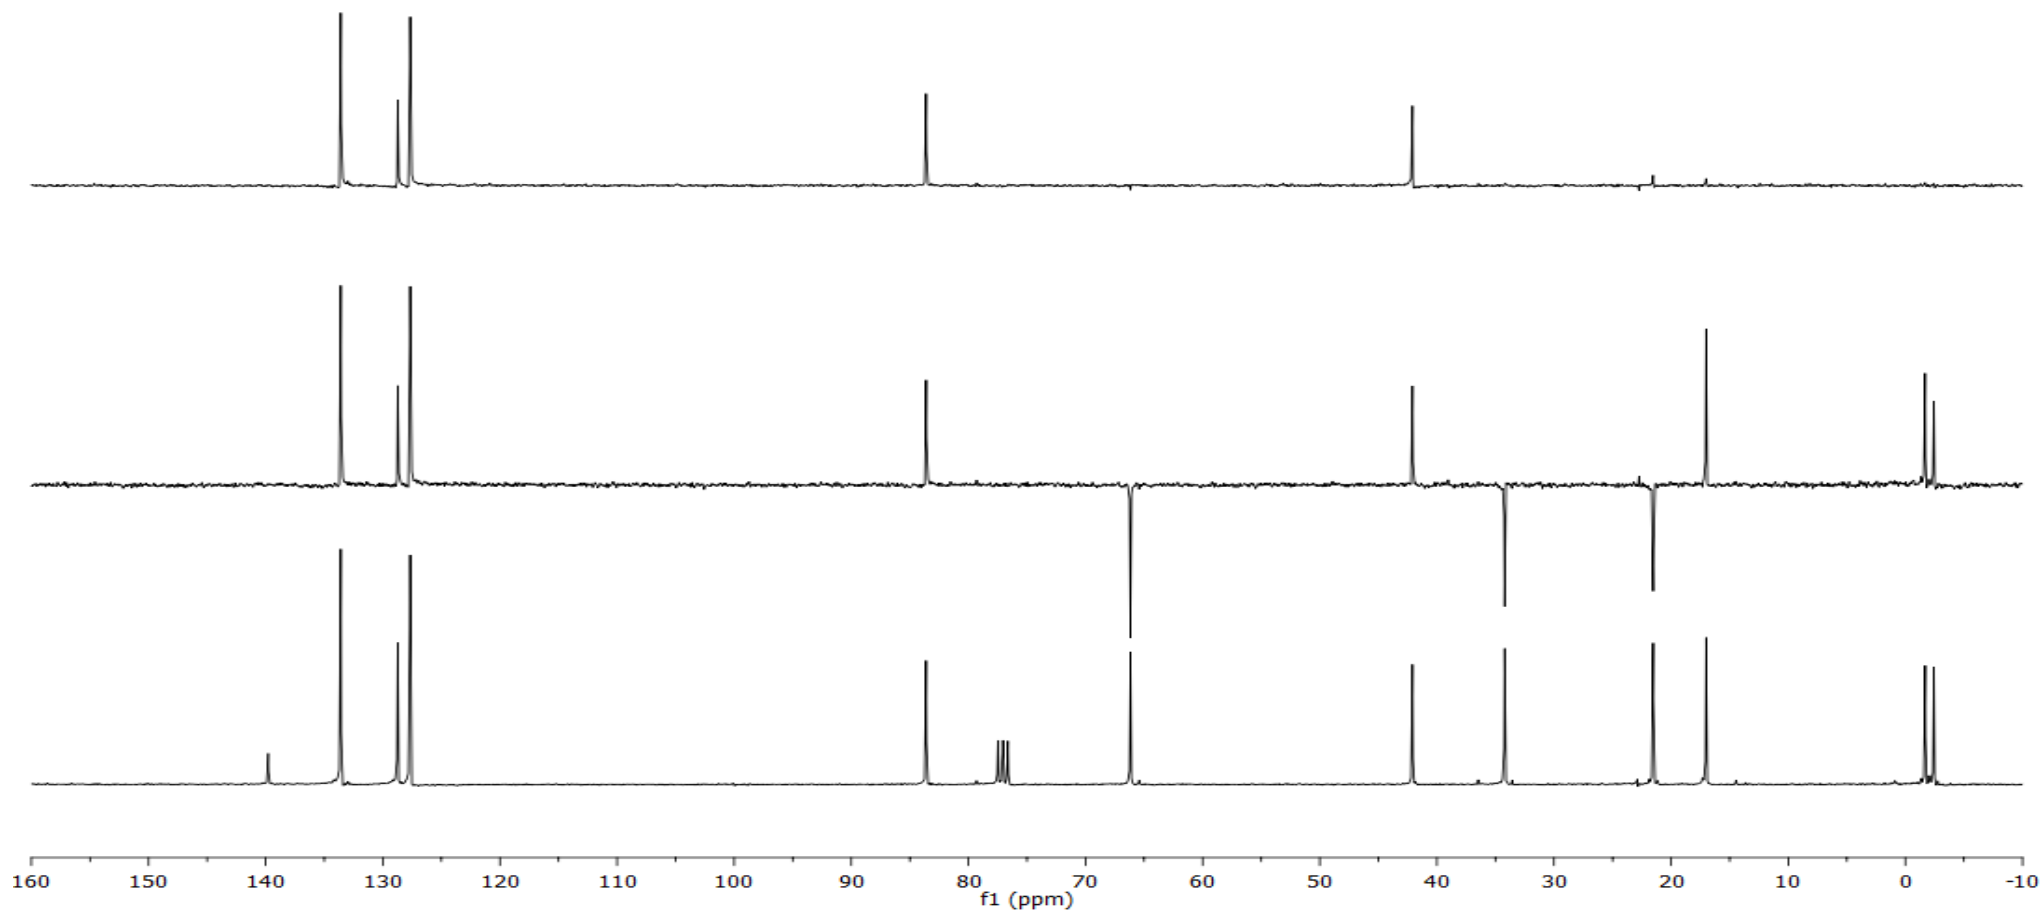

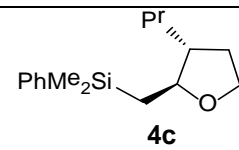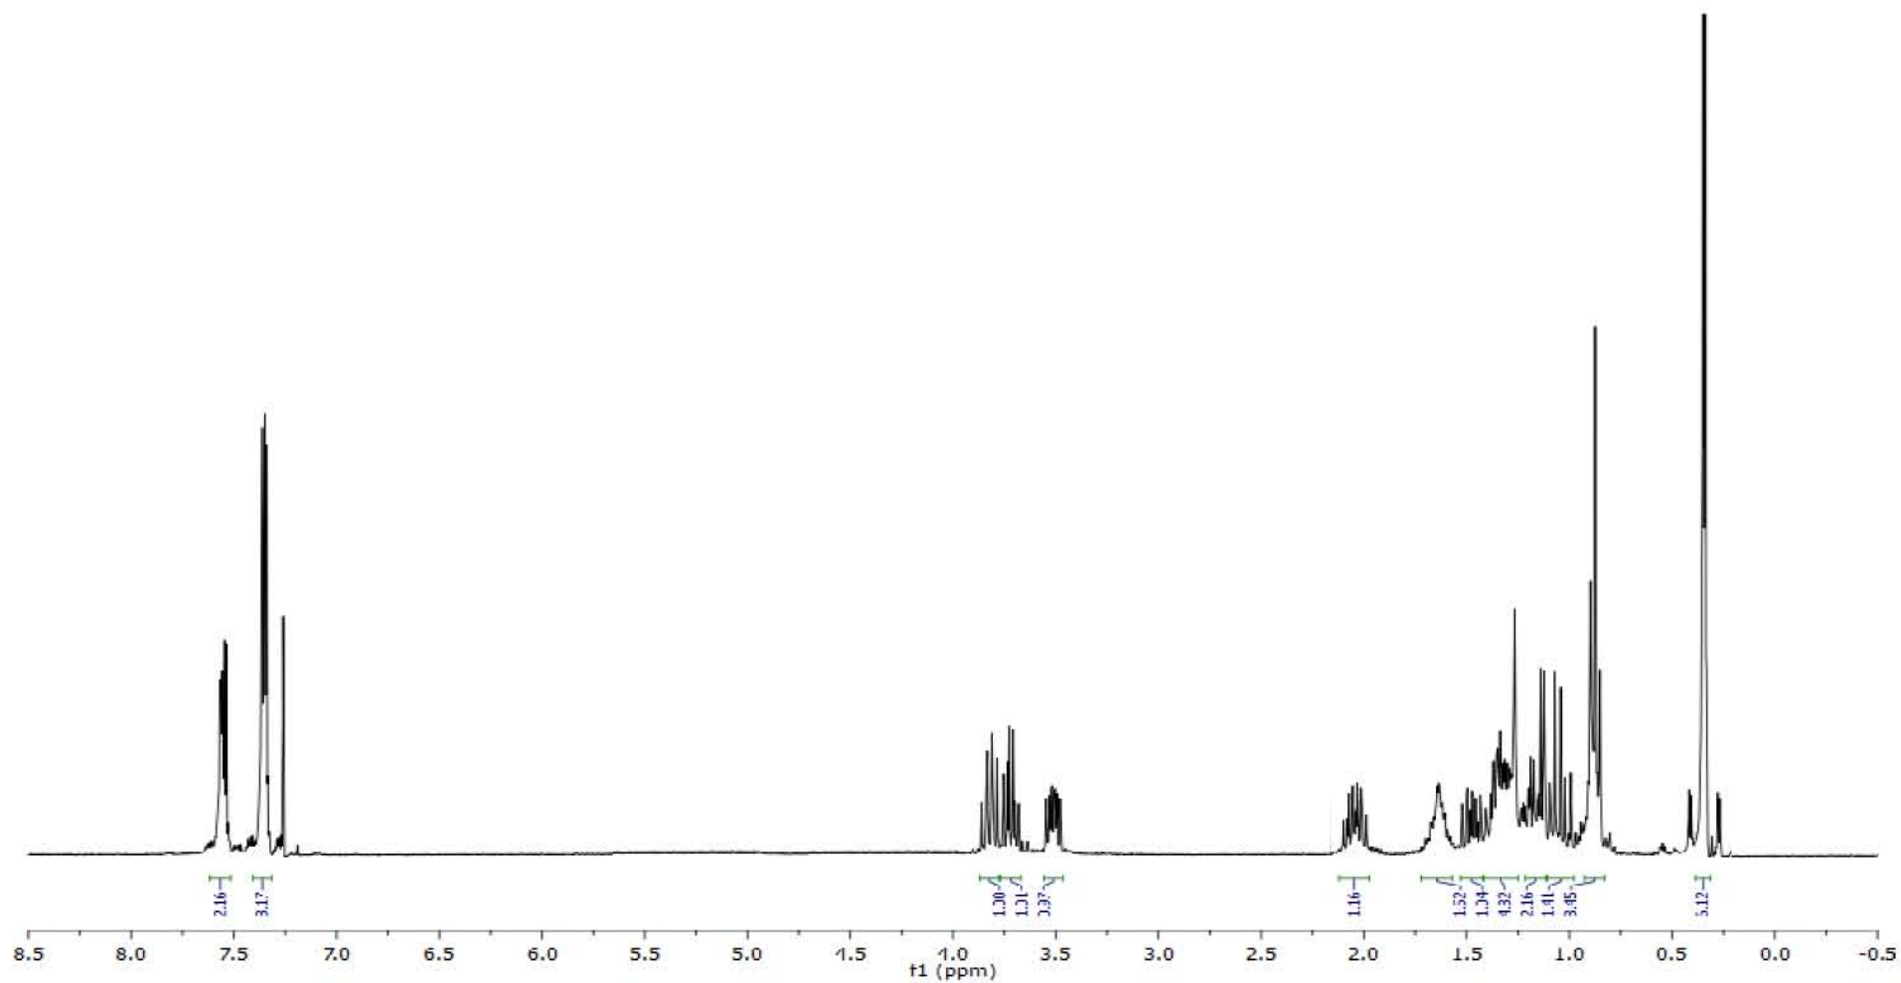



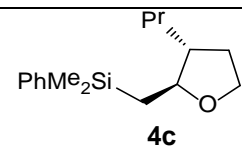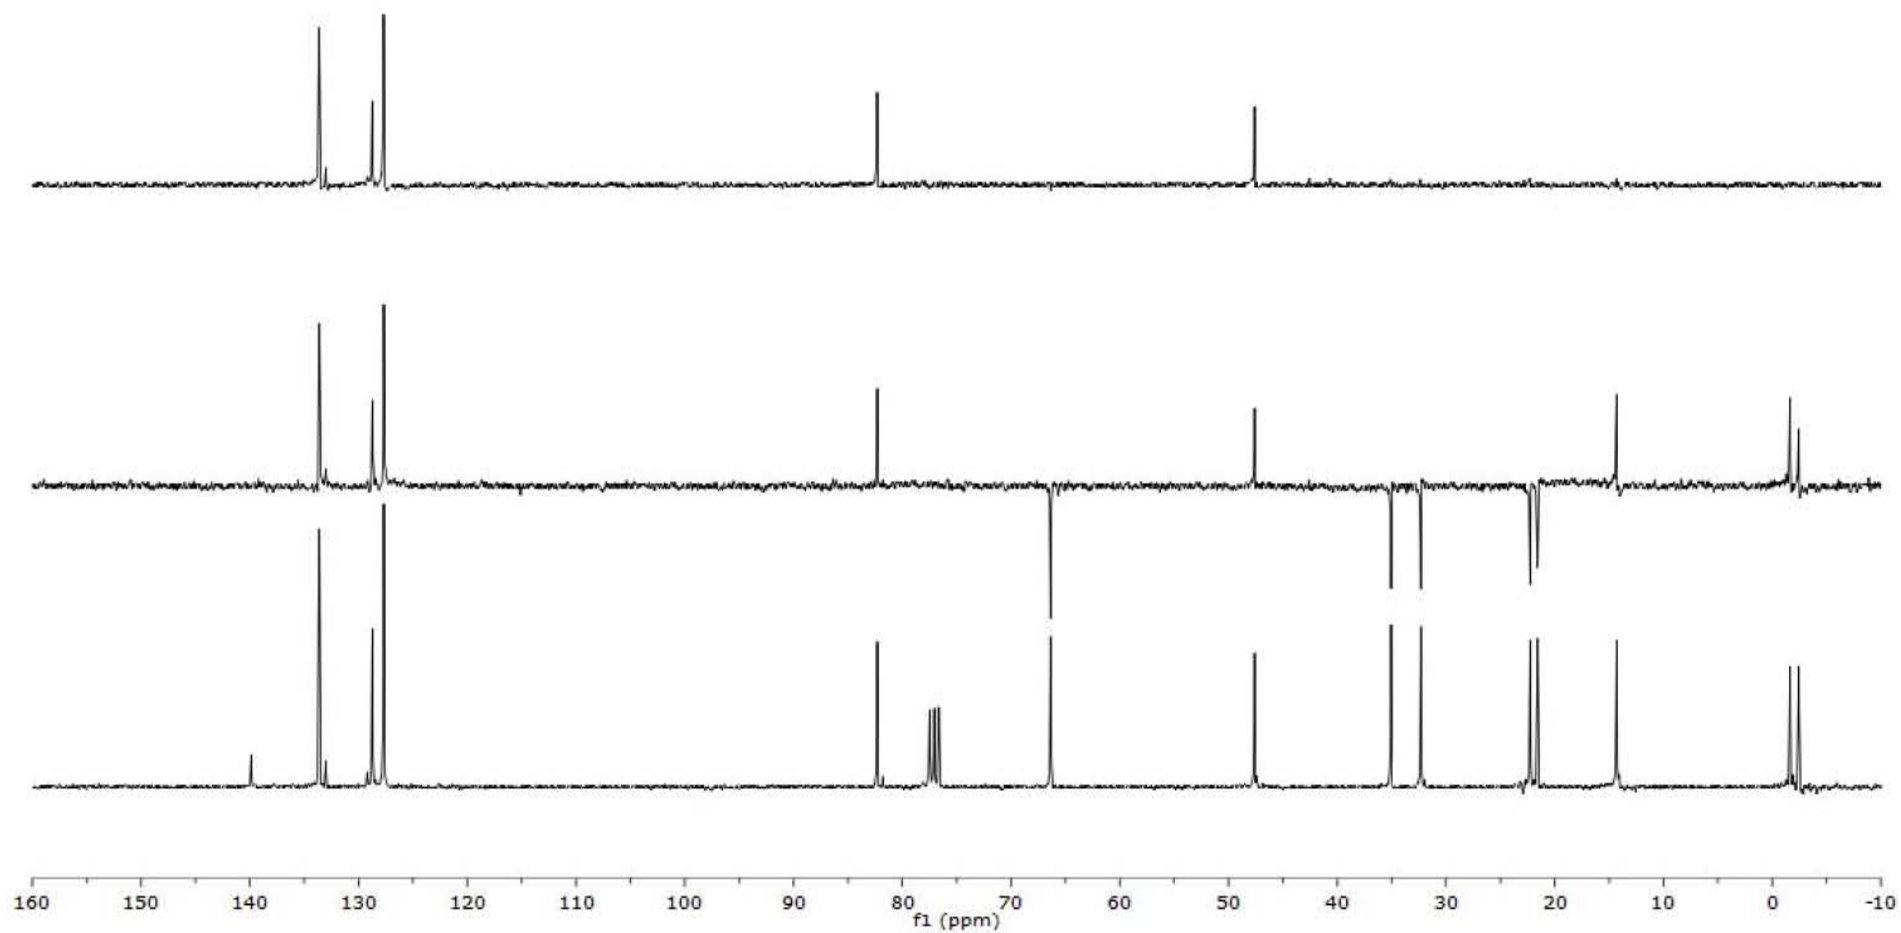



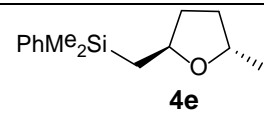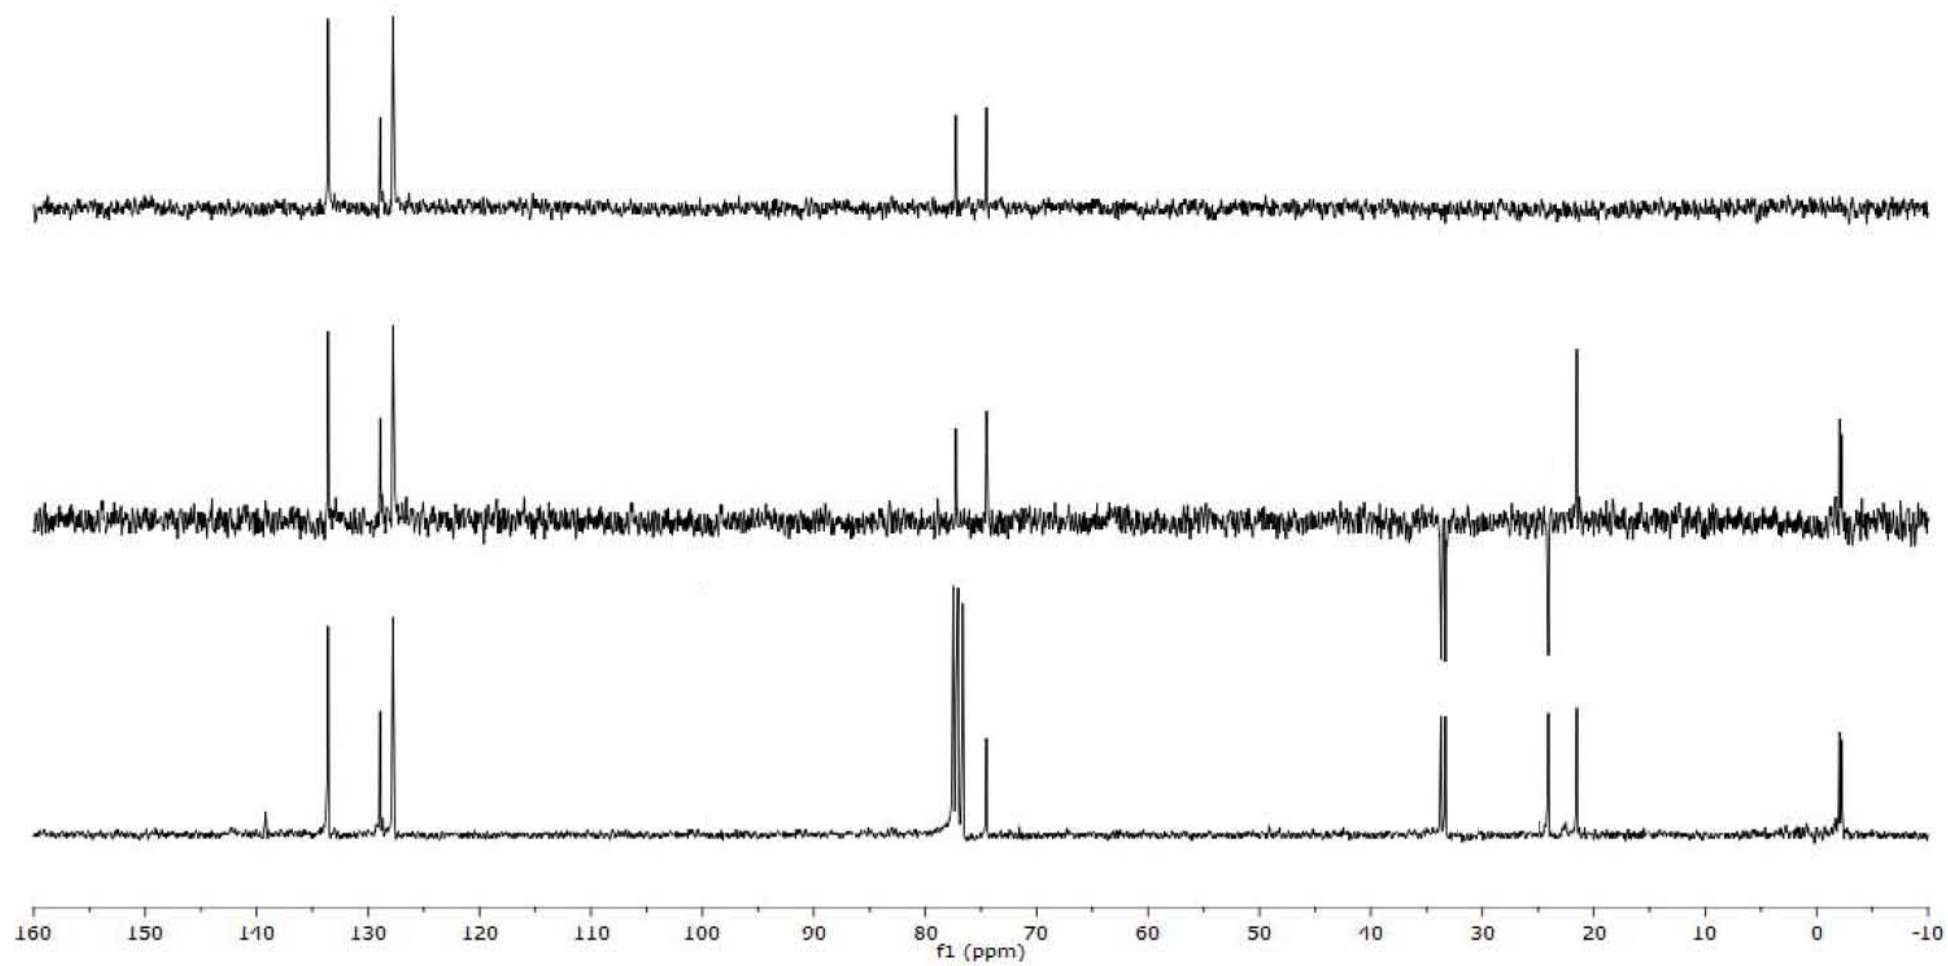

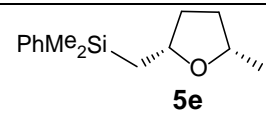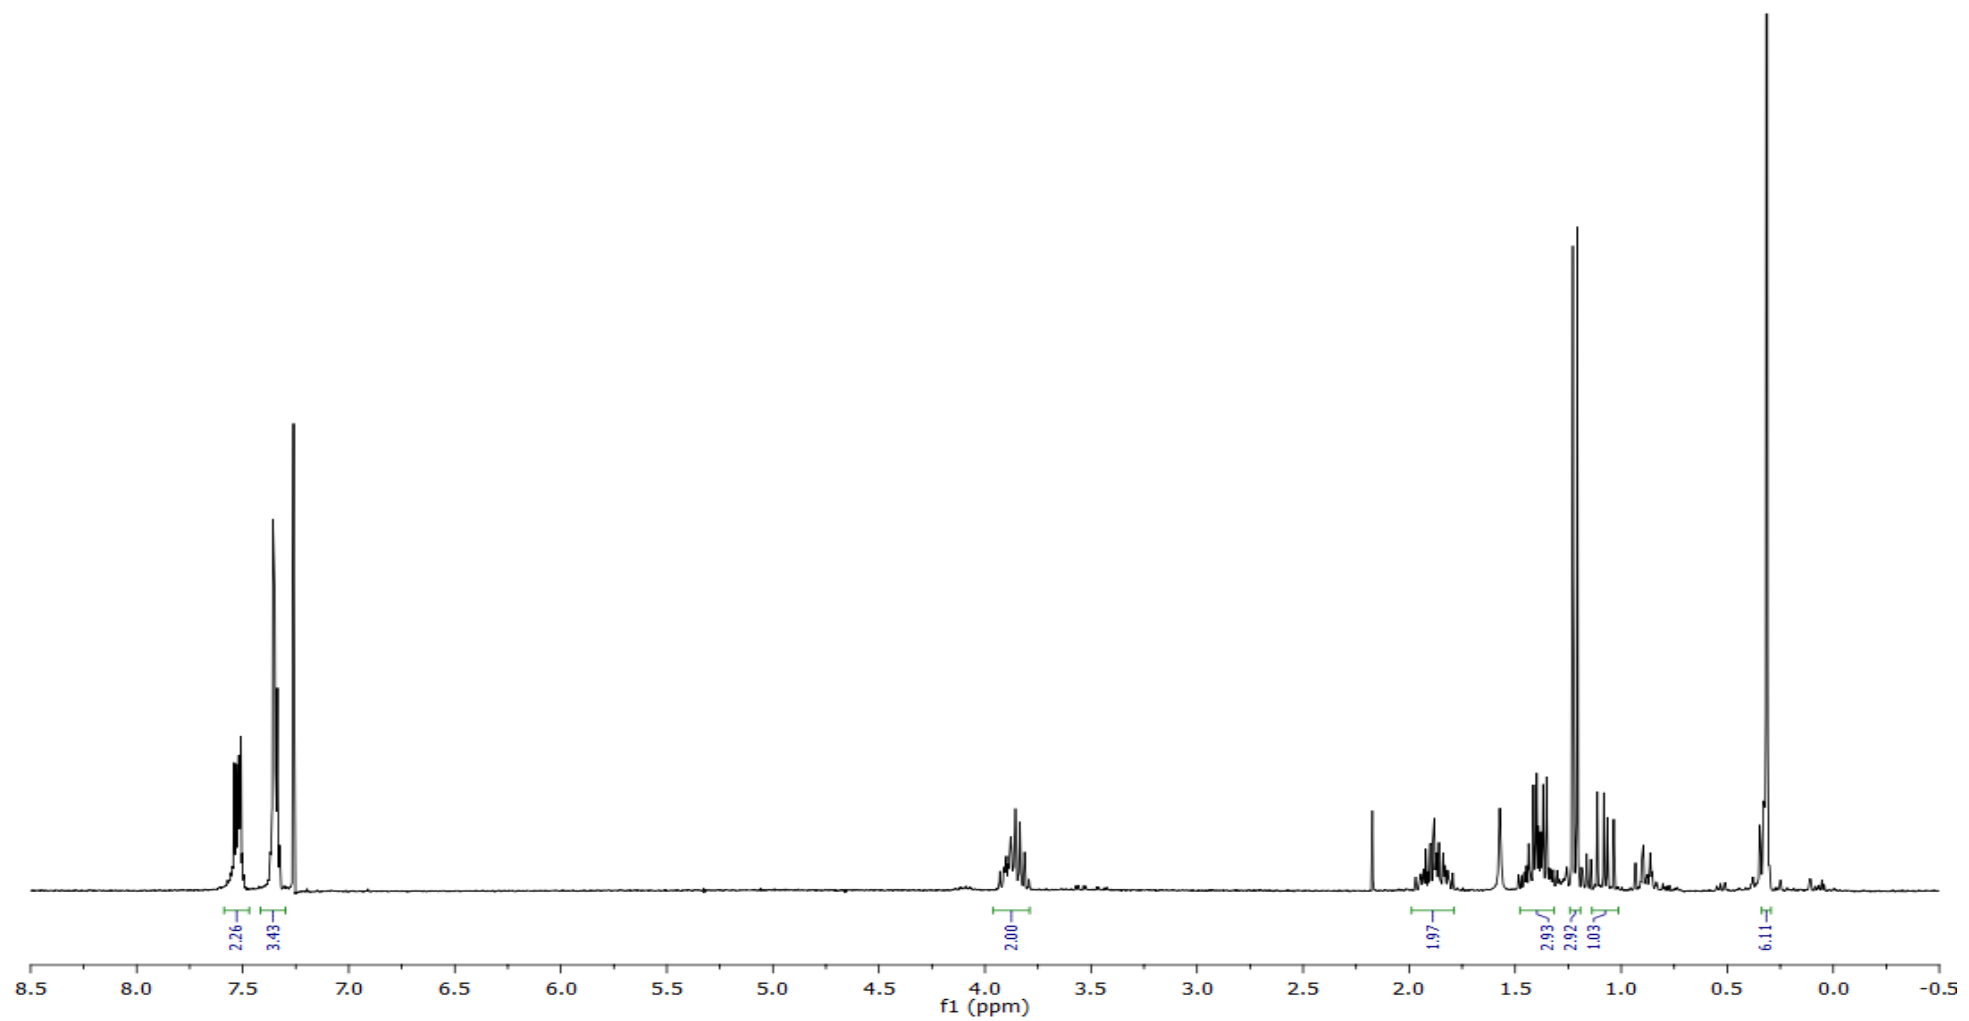

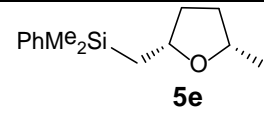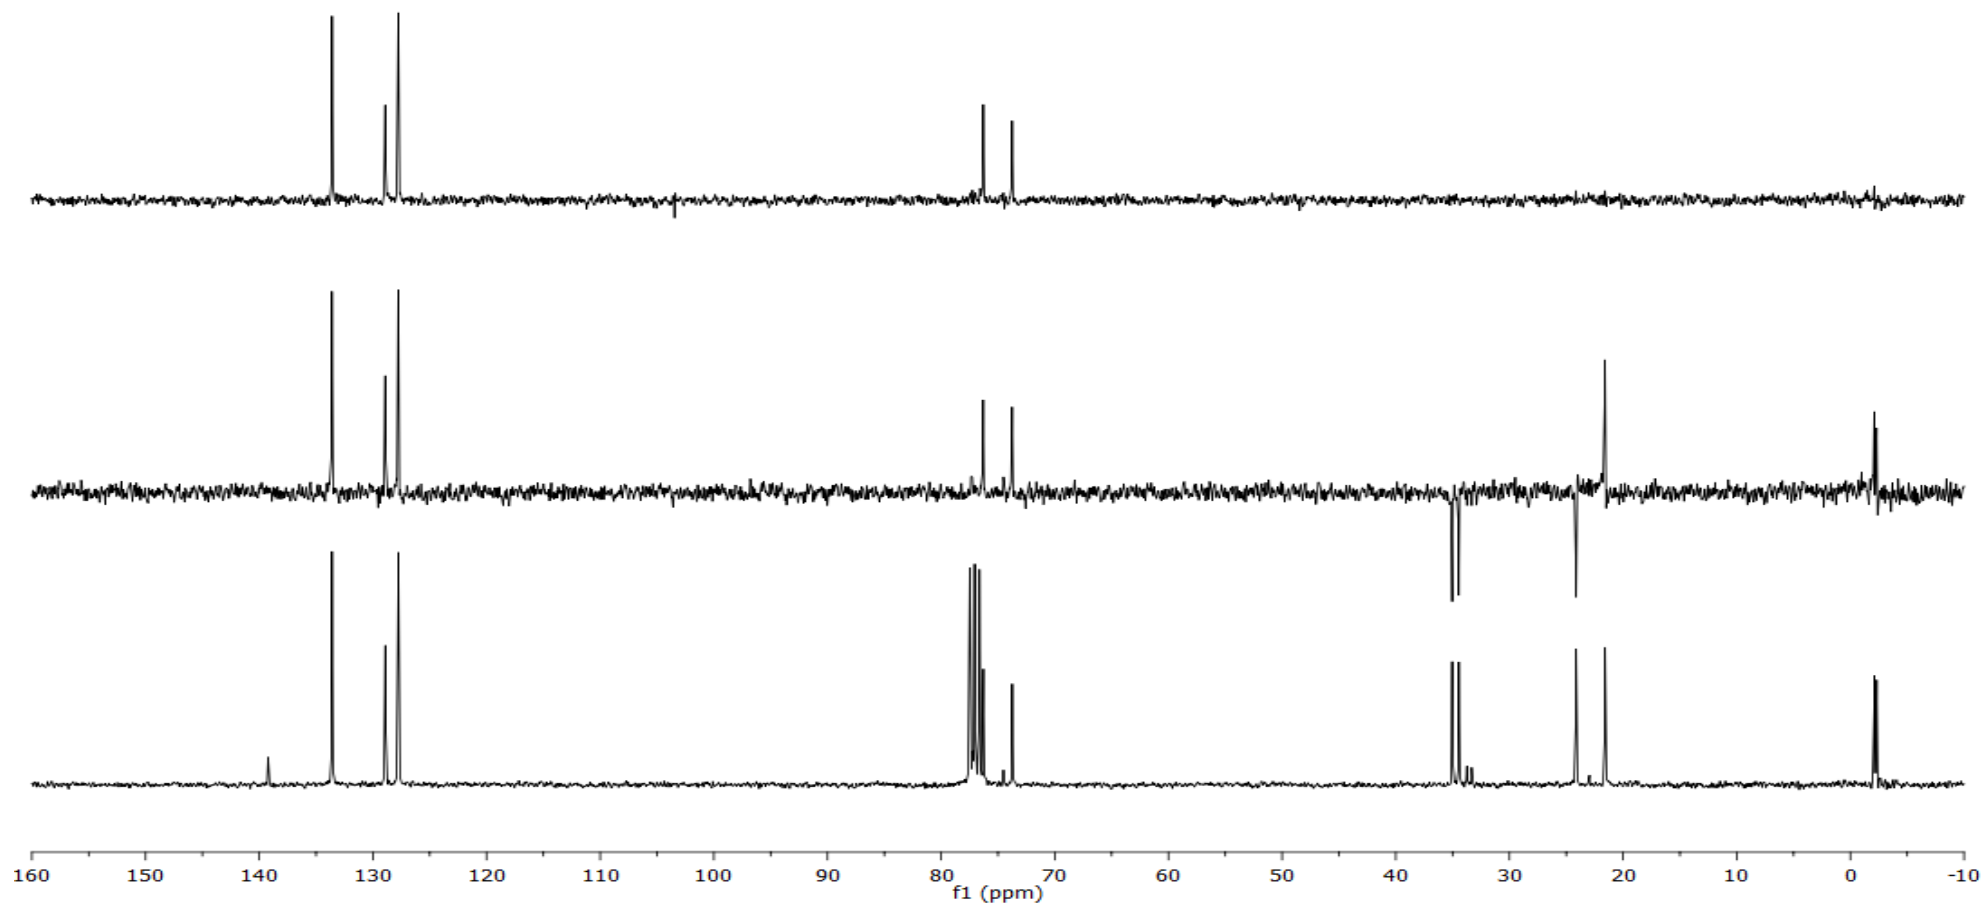

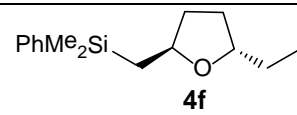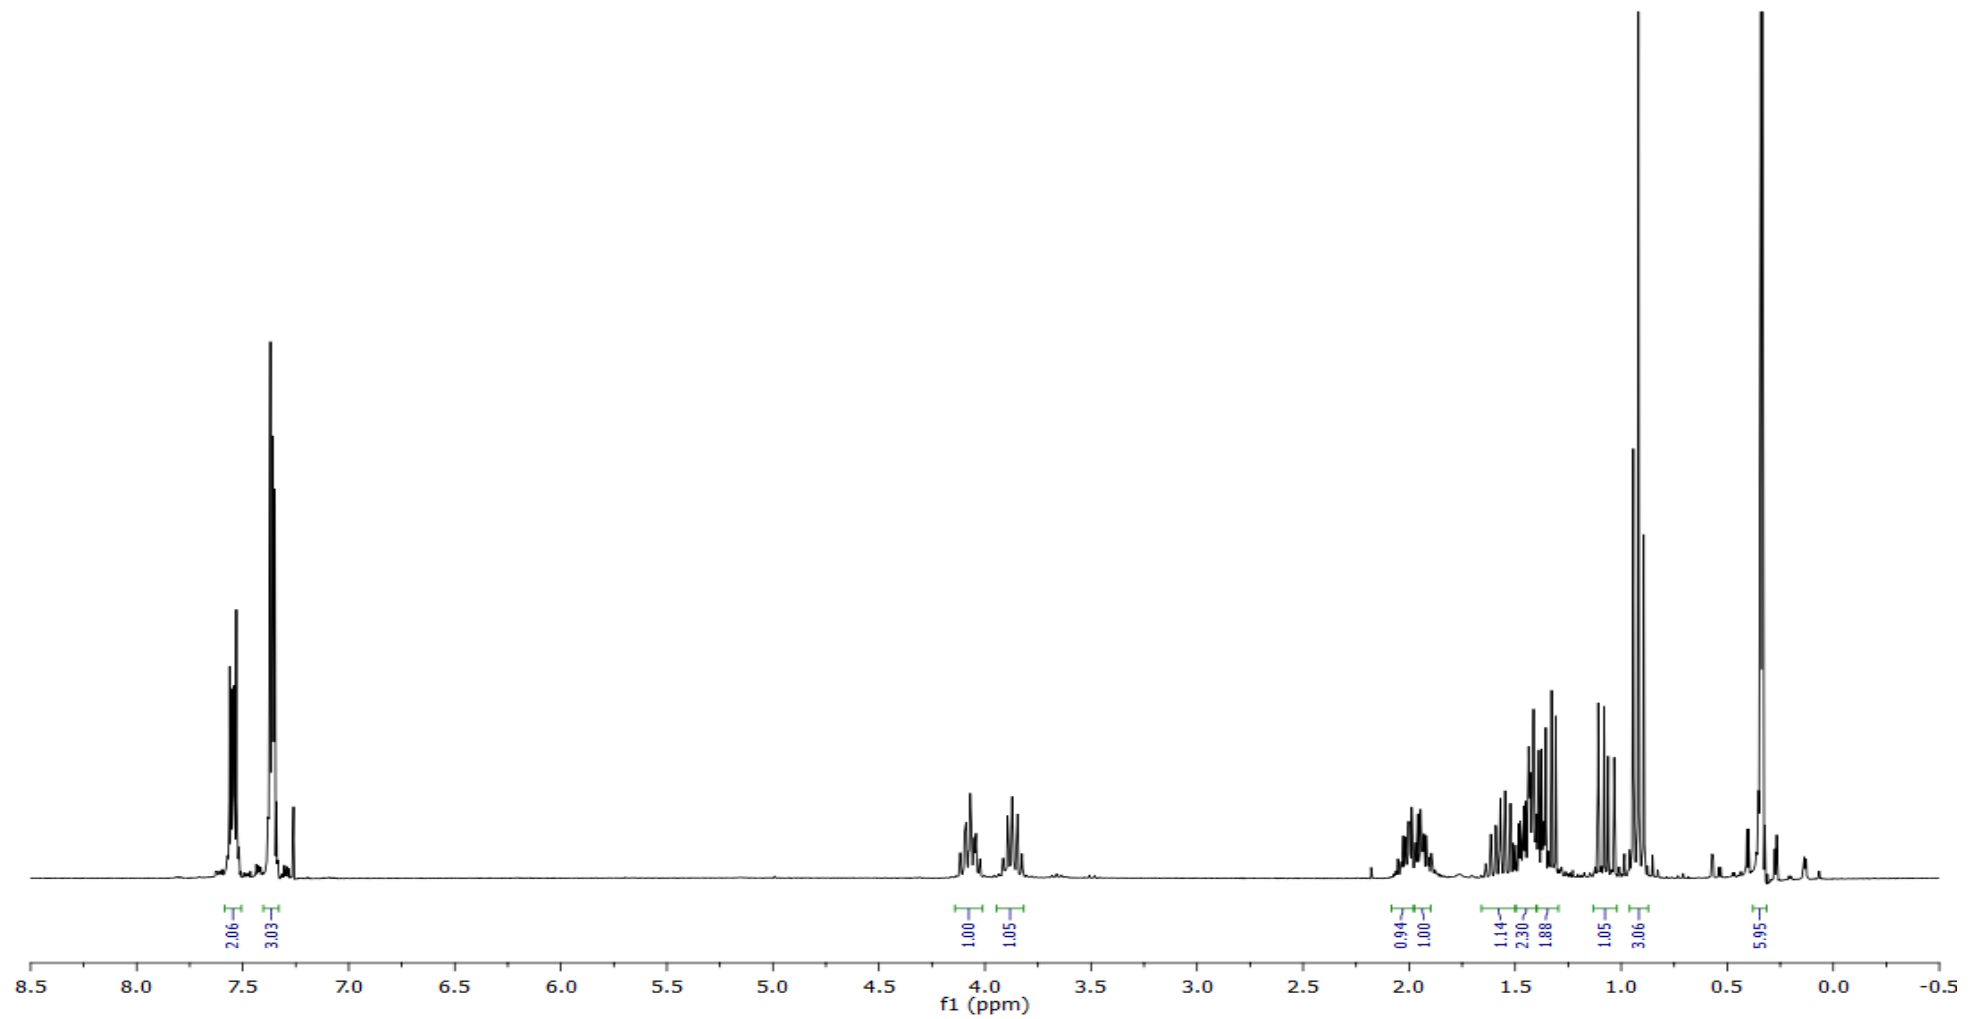

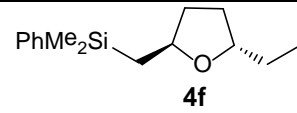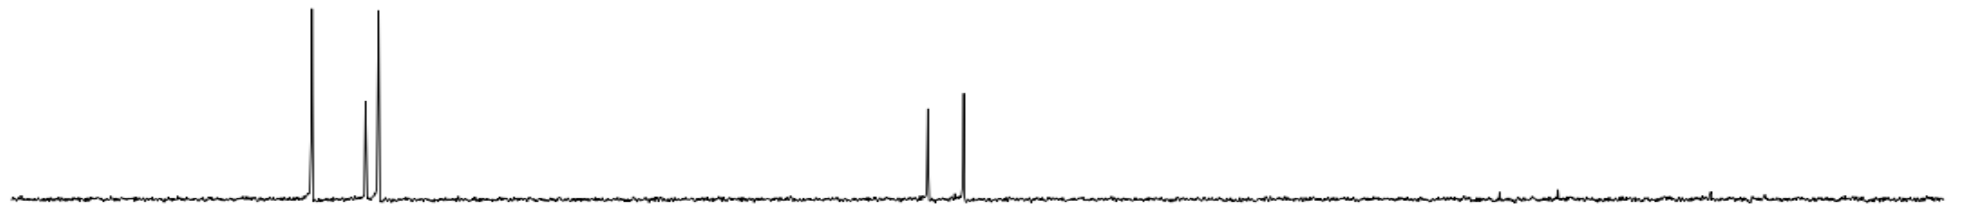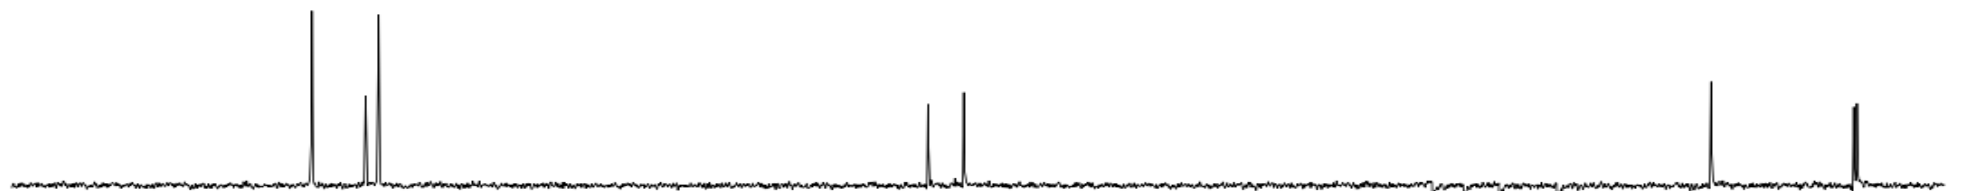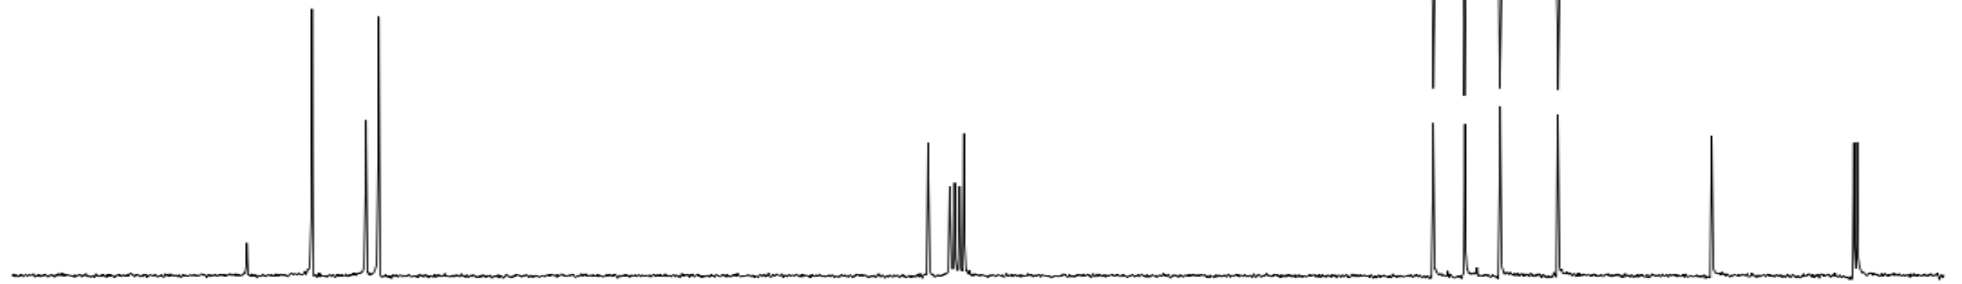

150 140 130 120 110 100 90 80 70 60 50 40 30 20 10 0 -10  
f1 (ppm)

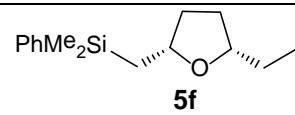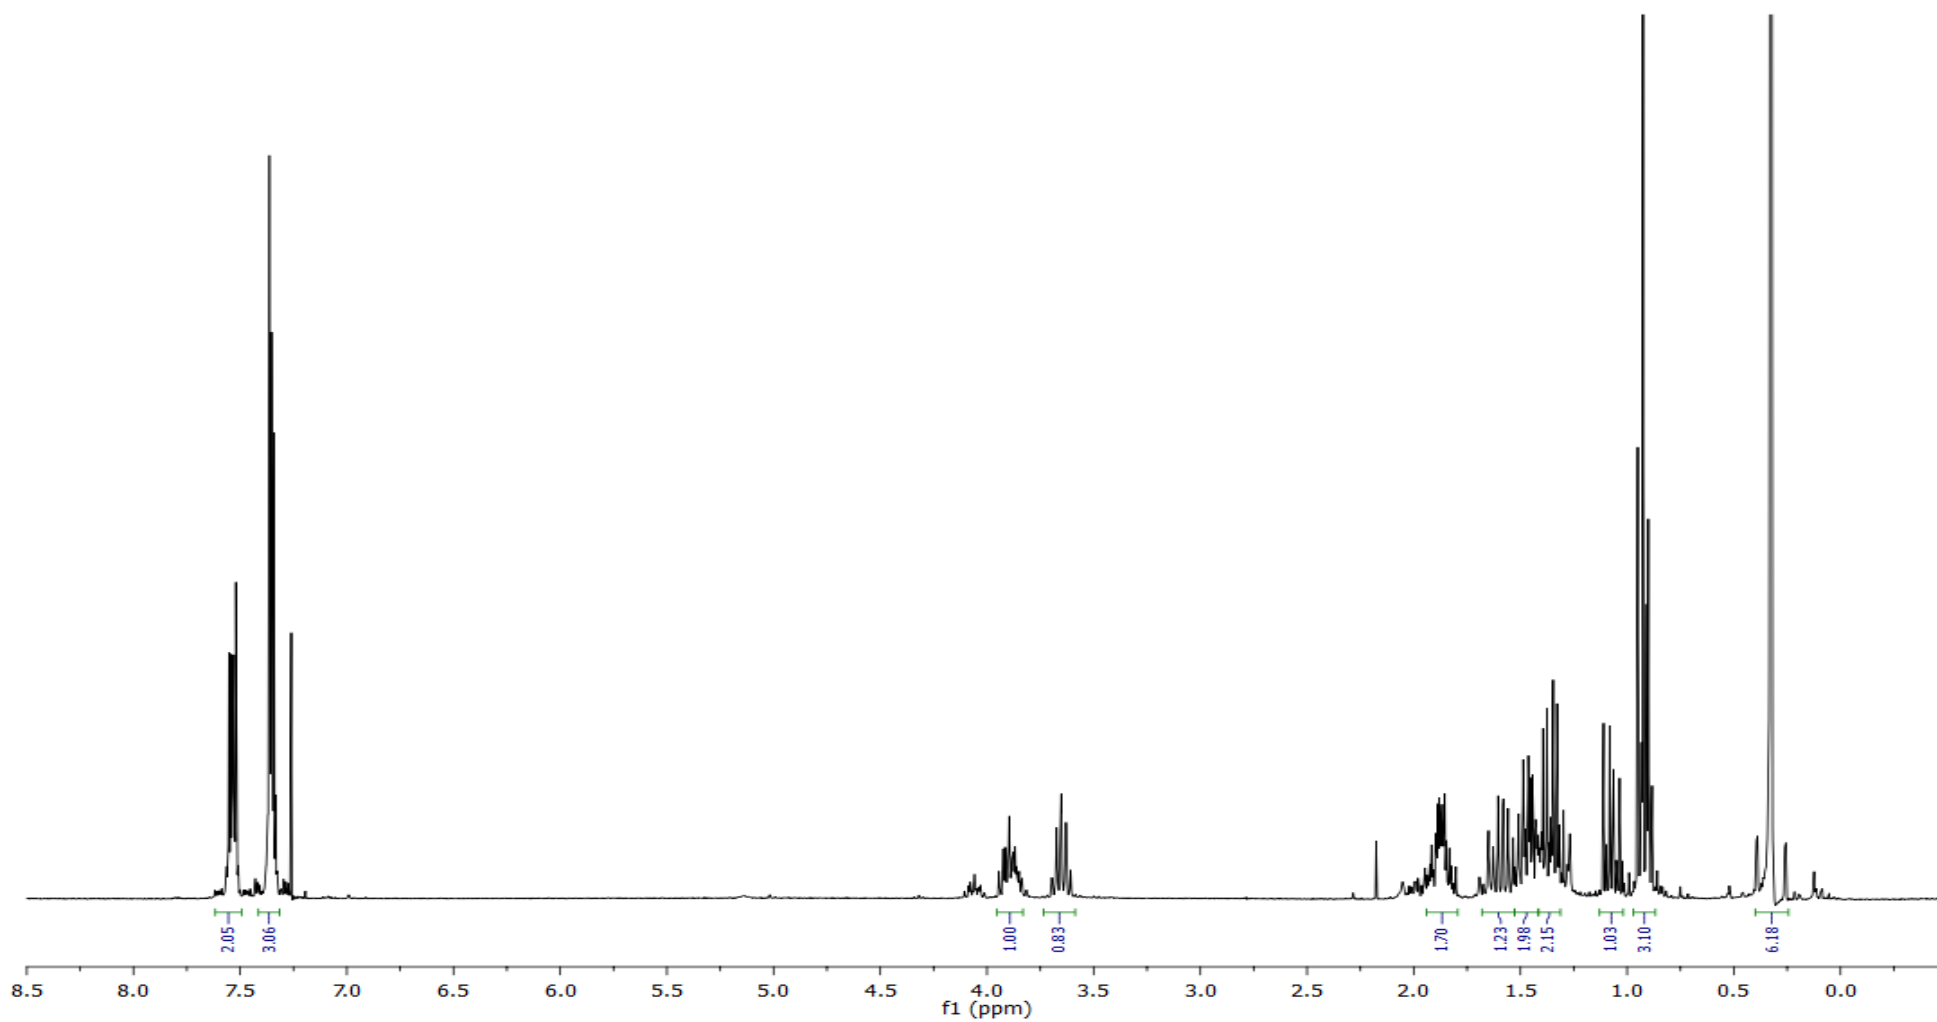



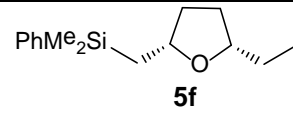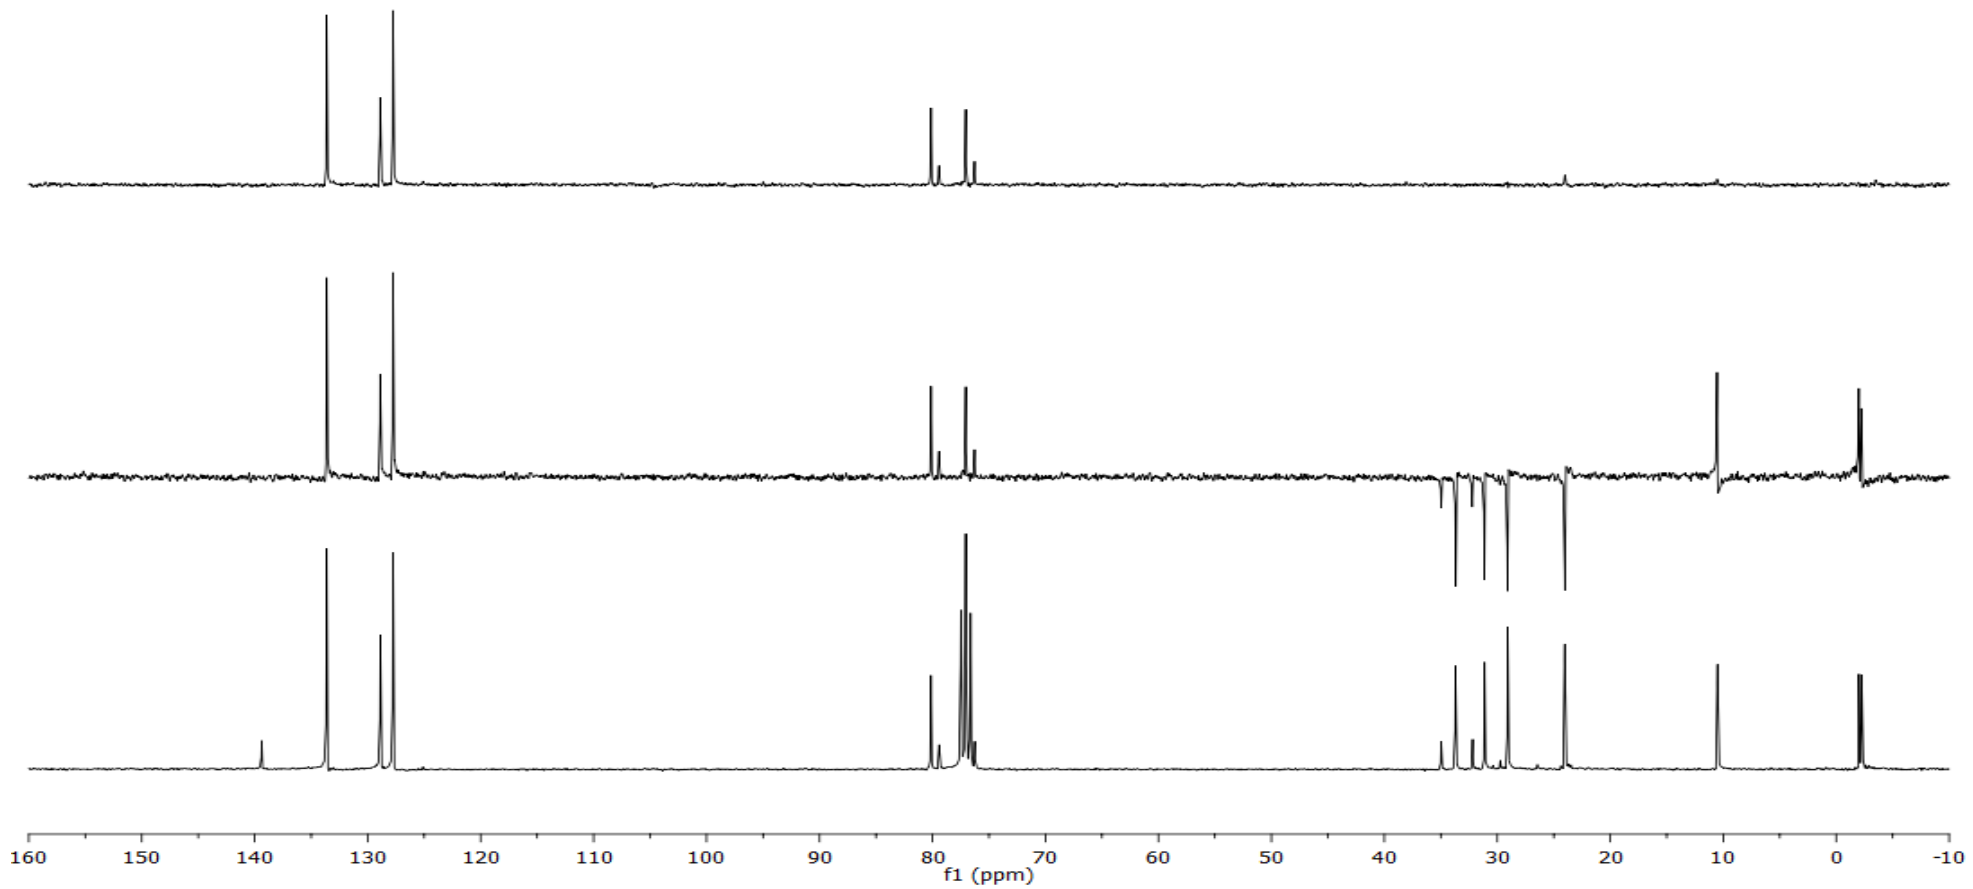

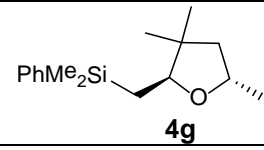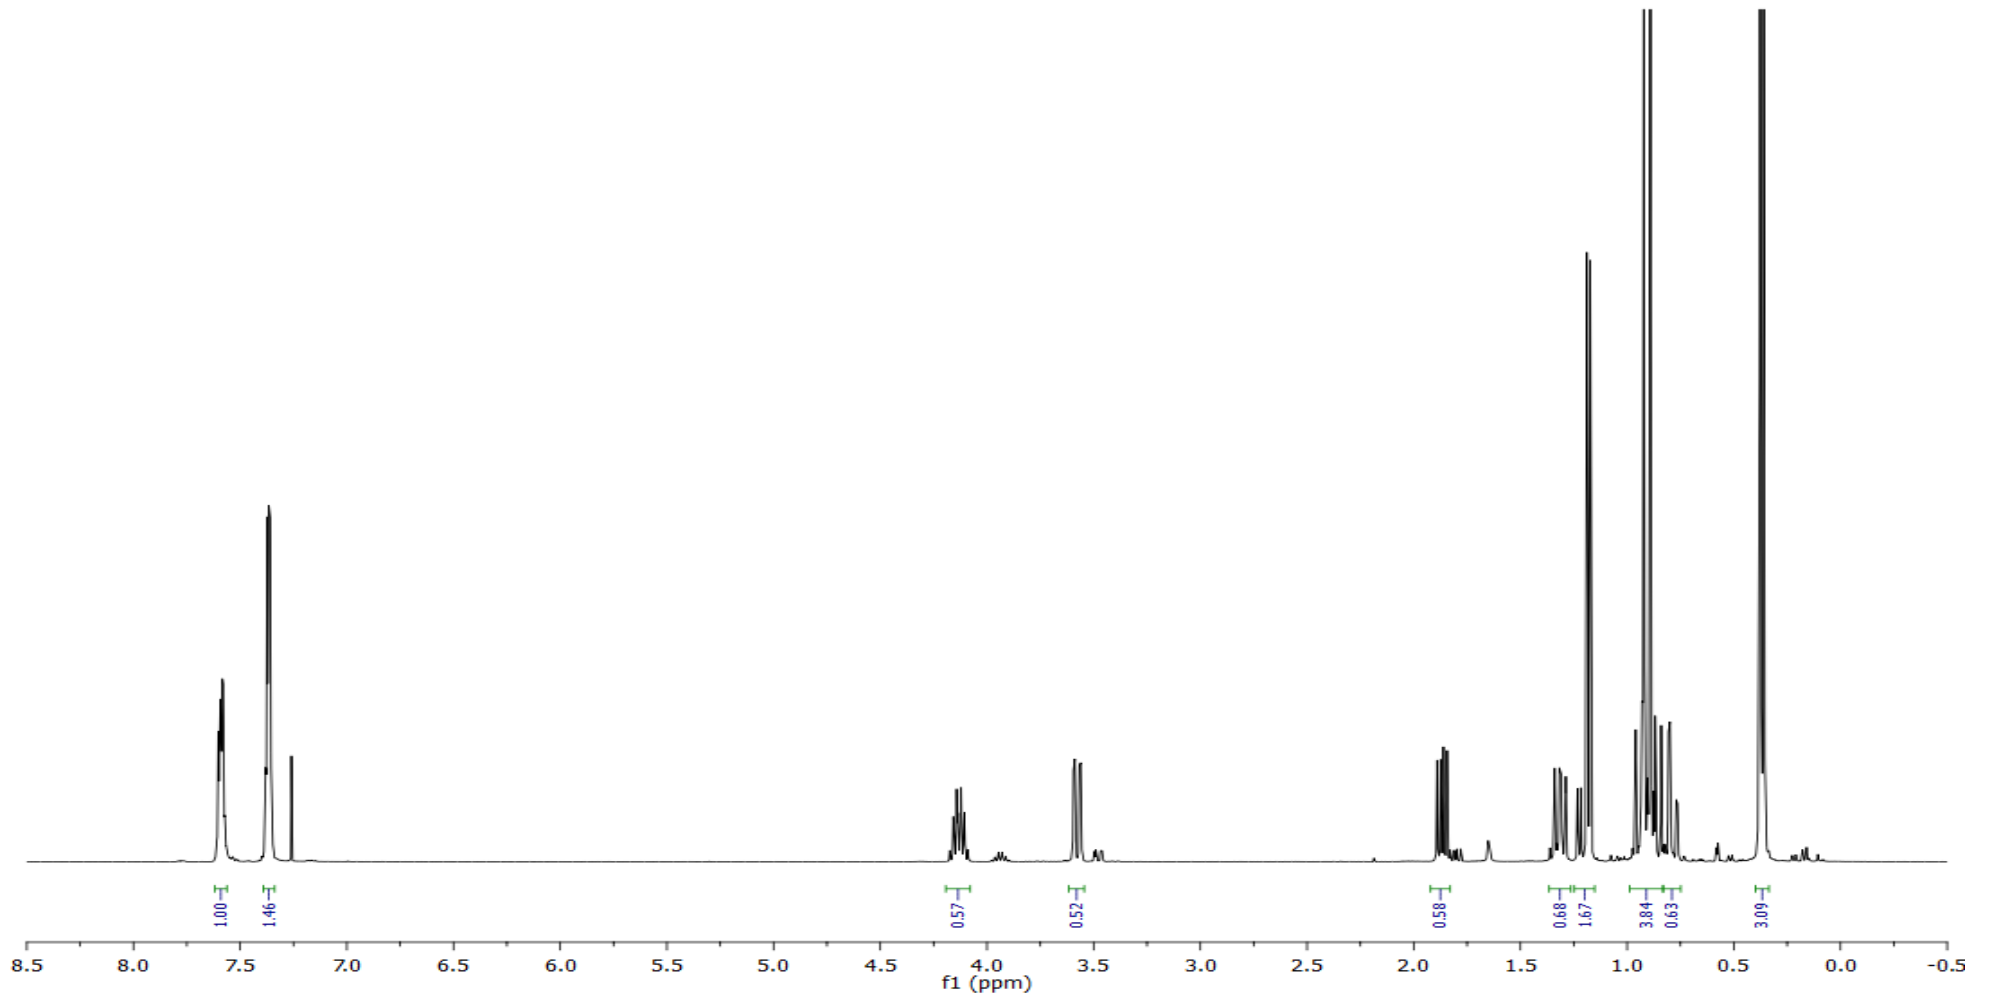

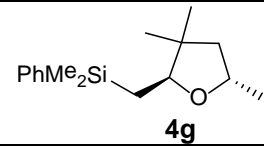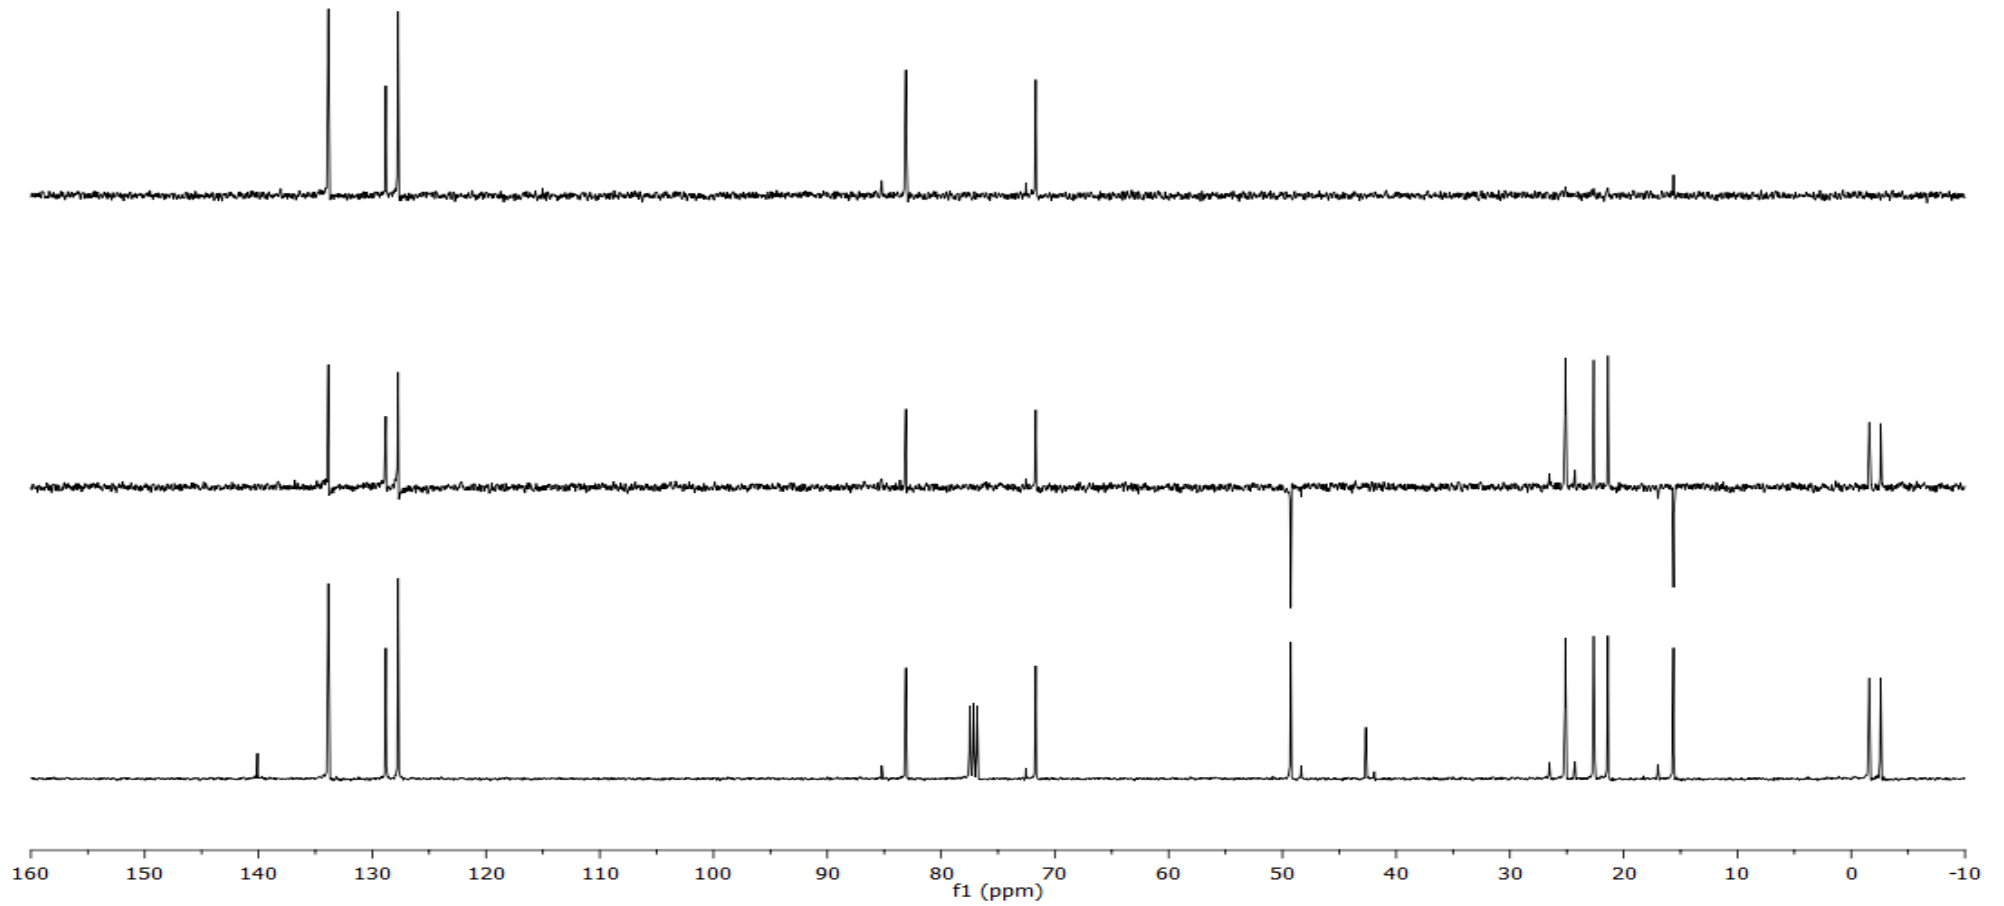

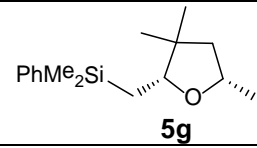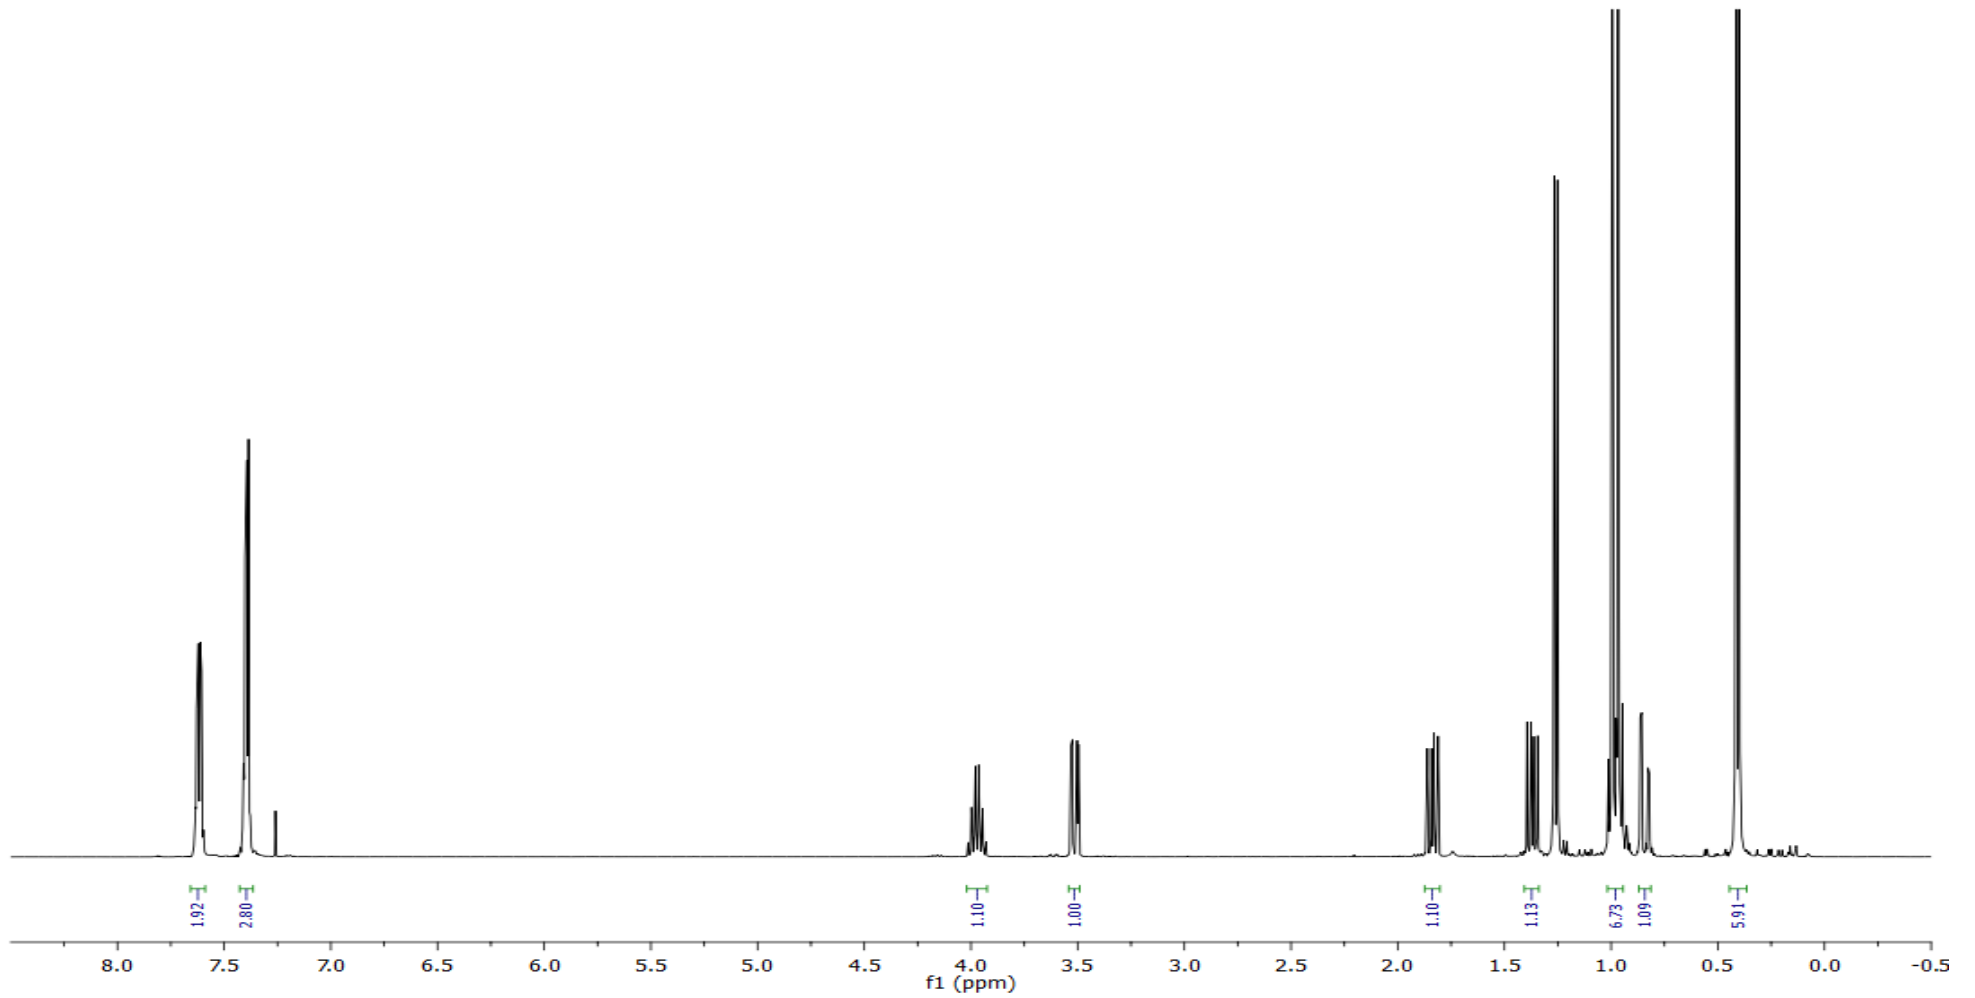

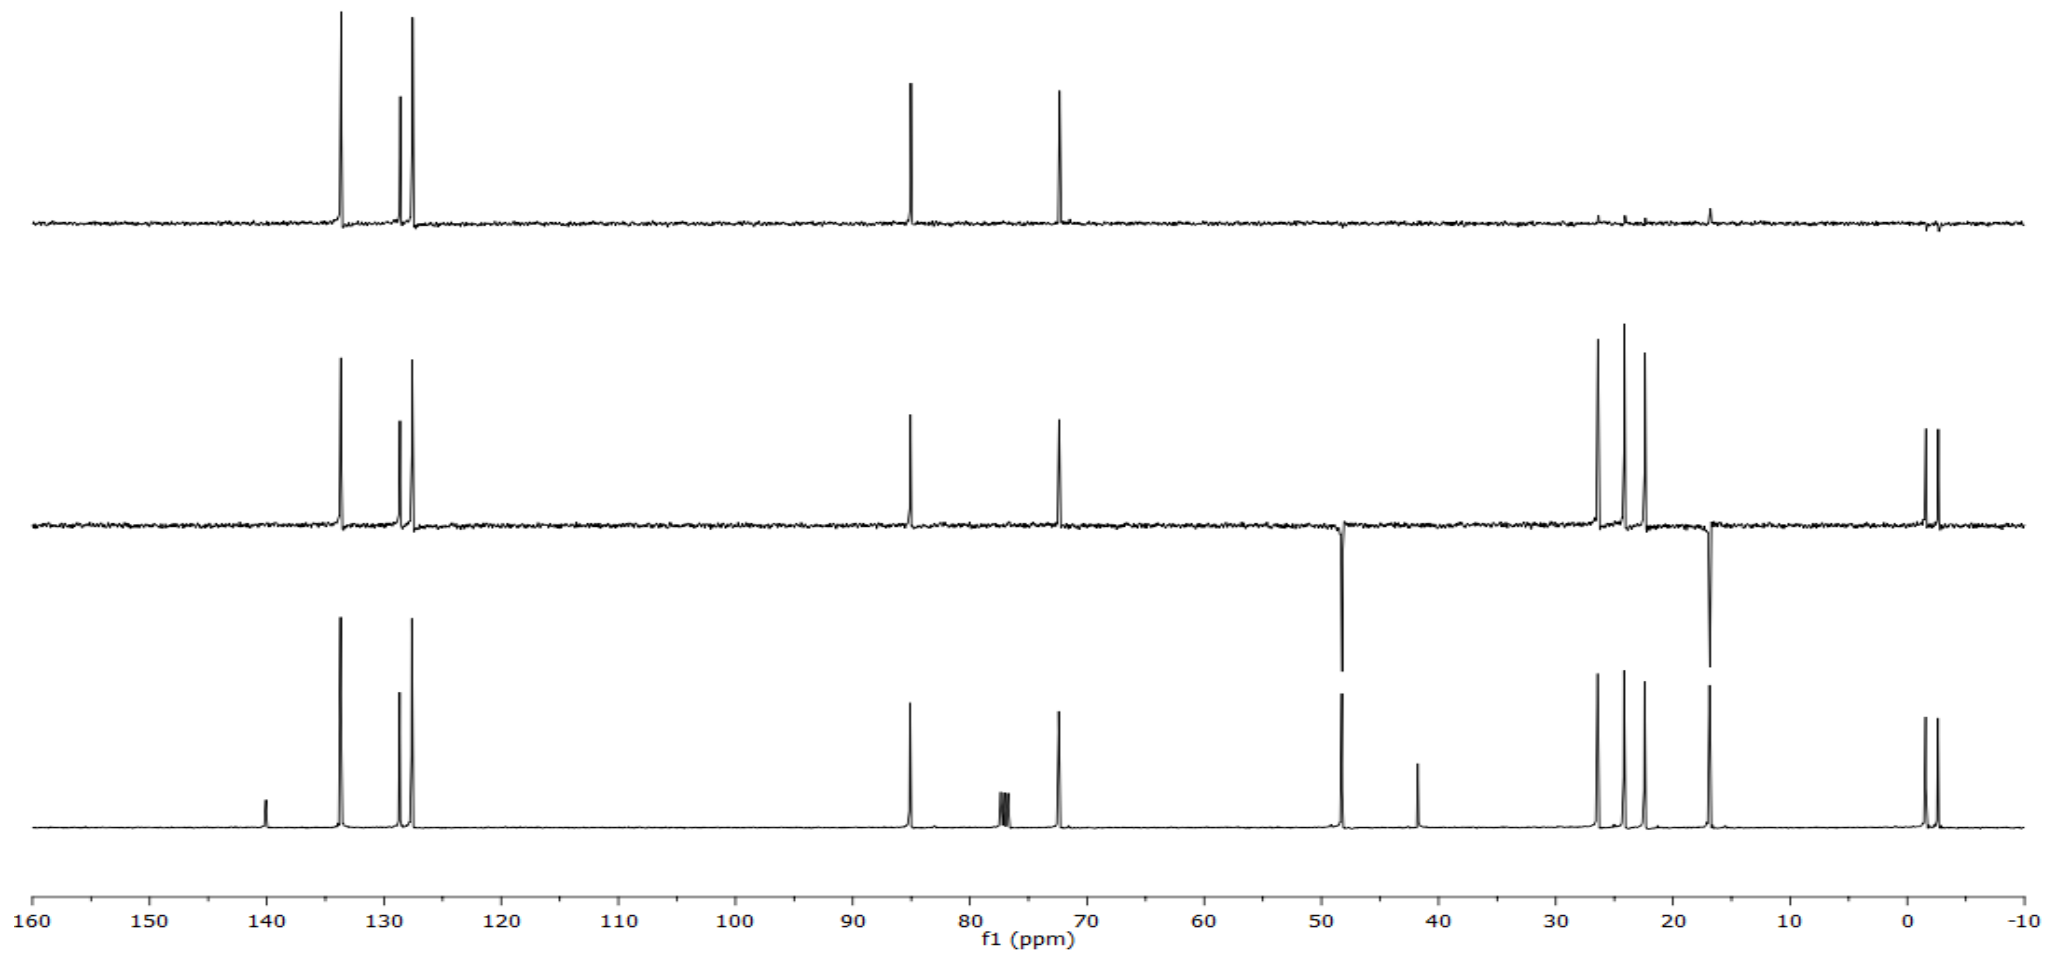

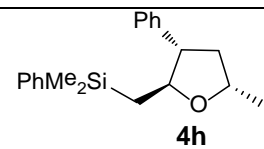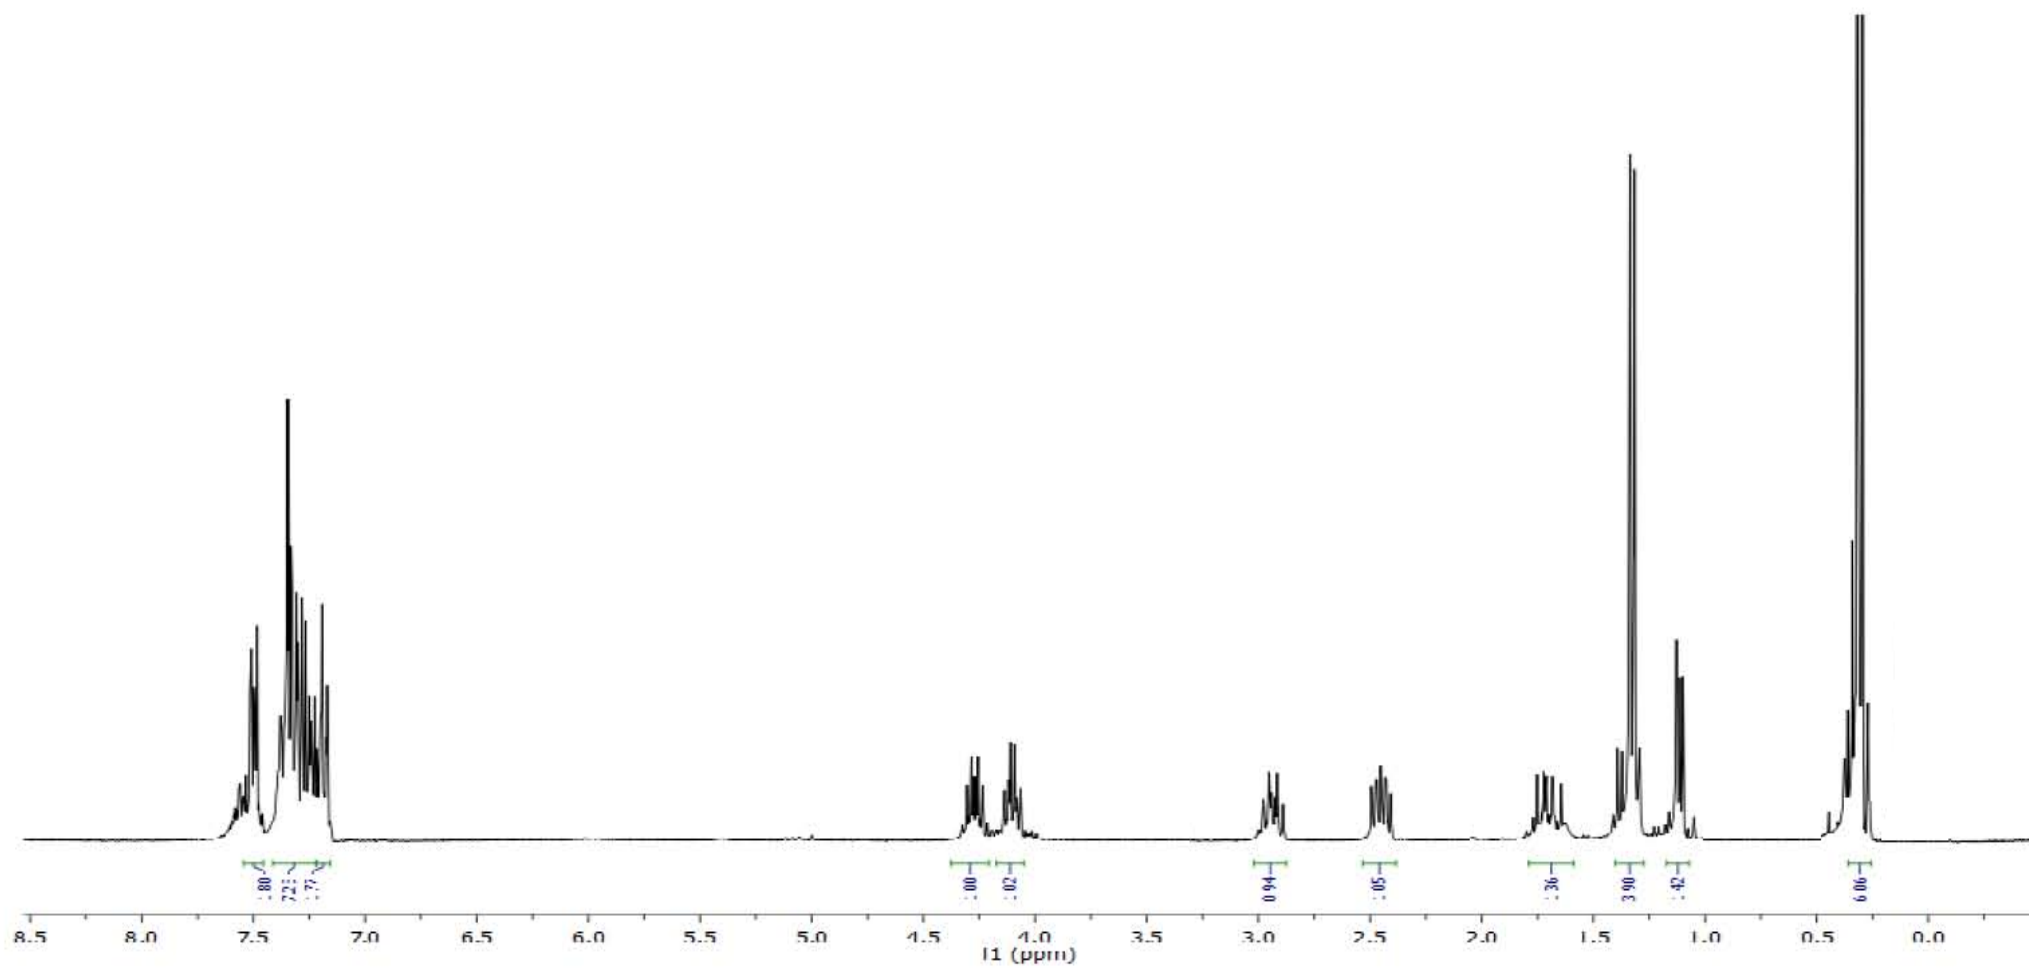

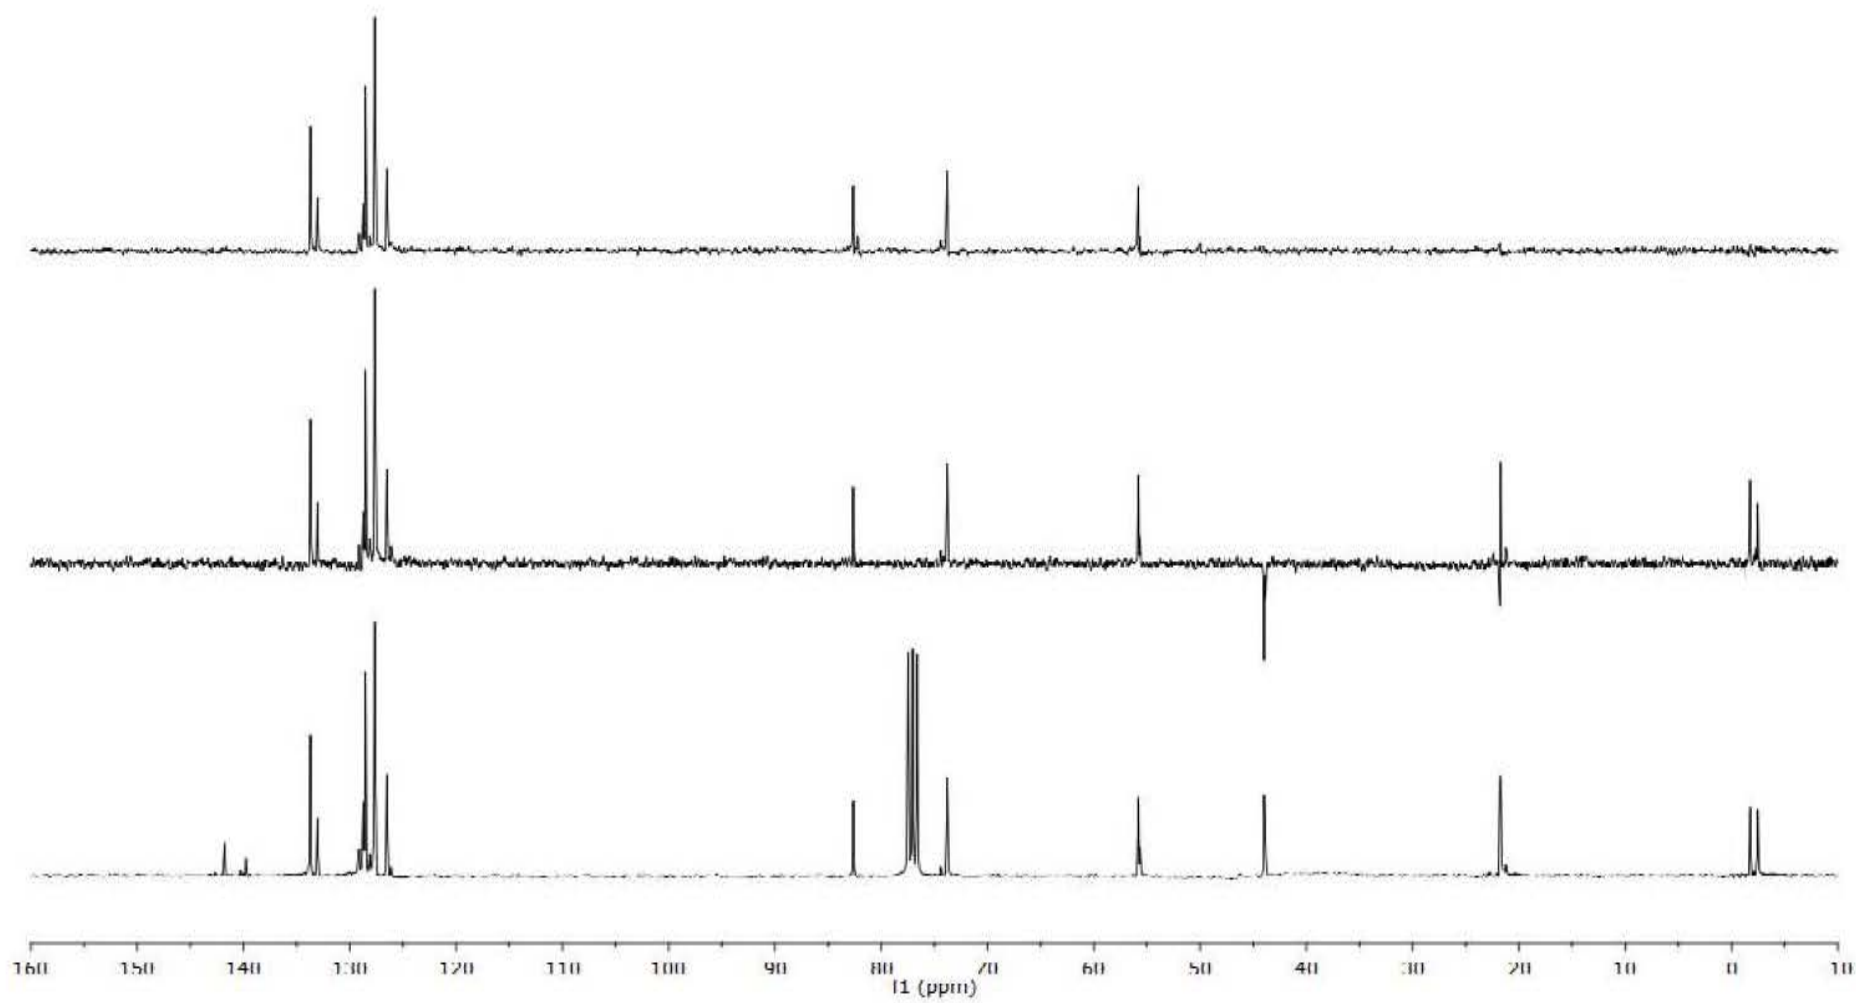

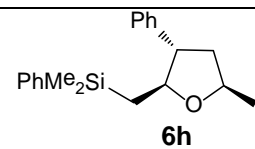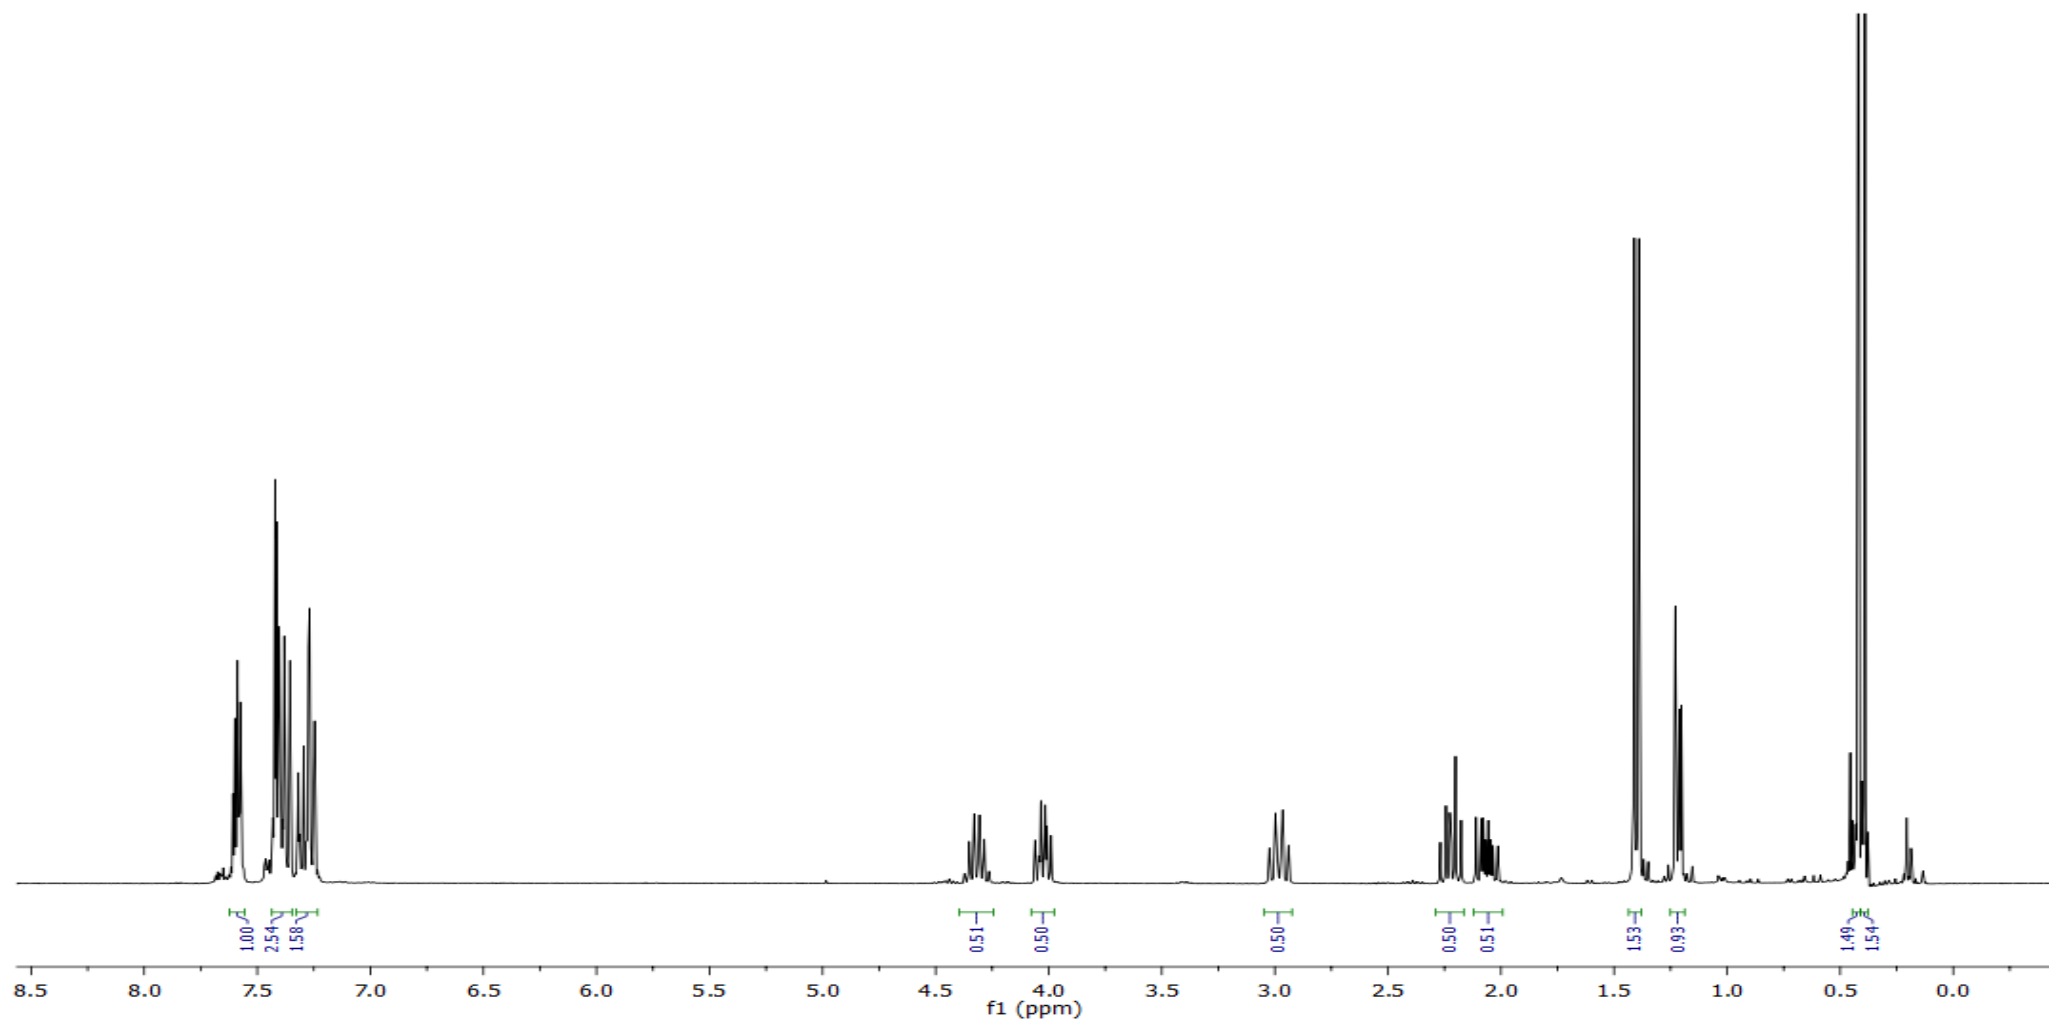



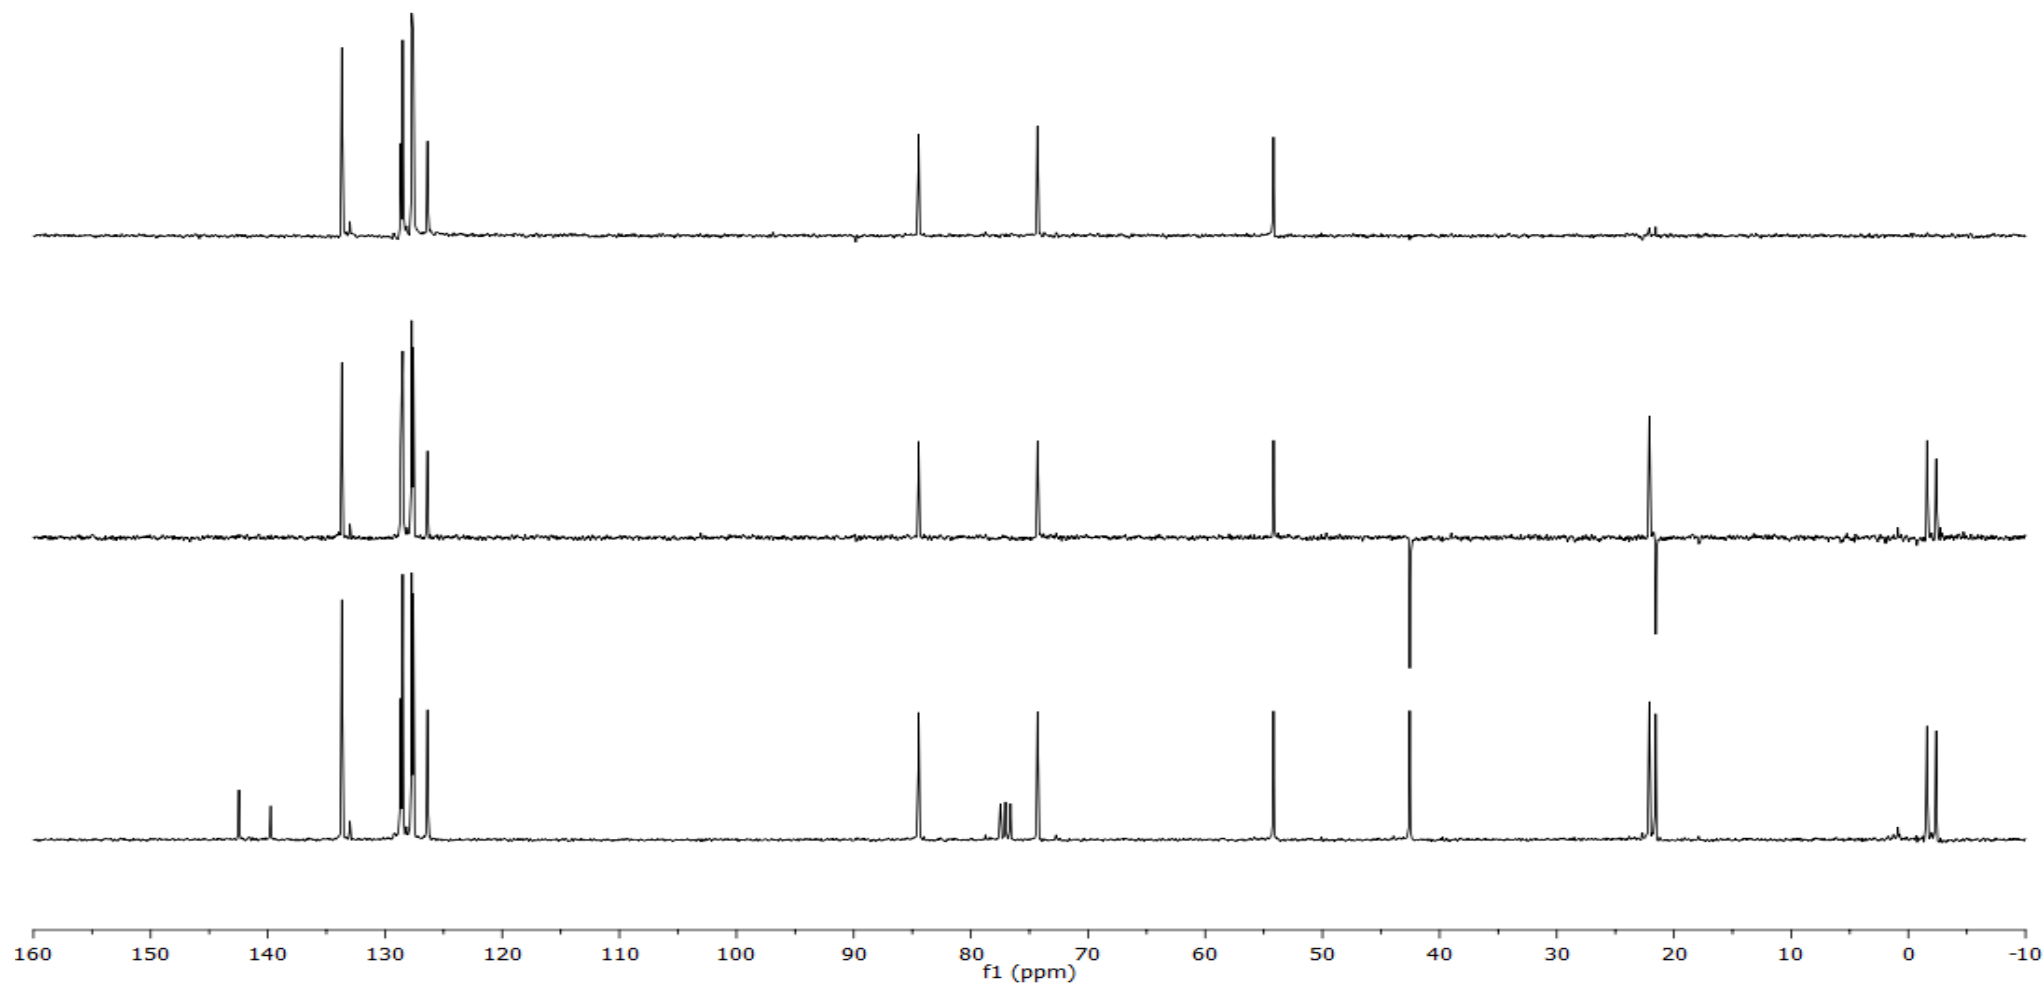

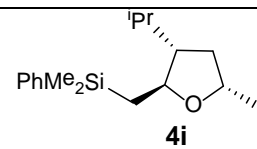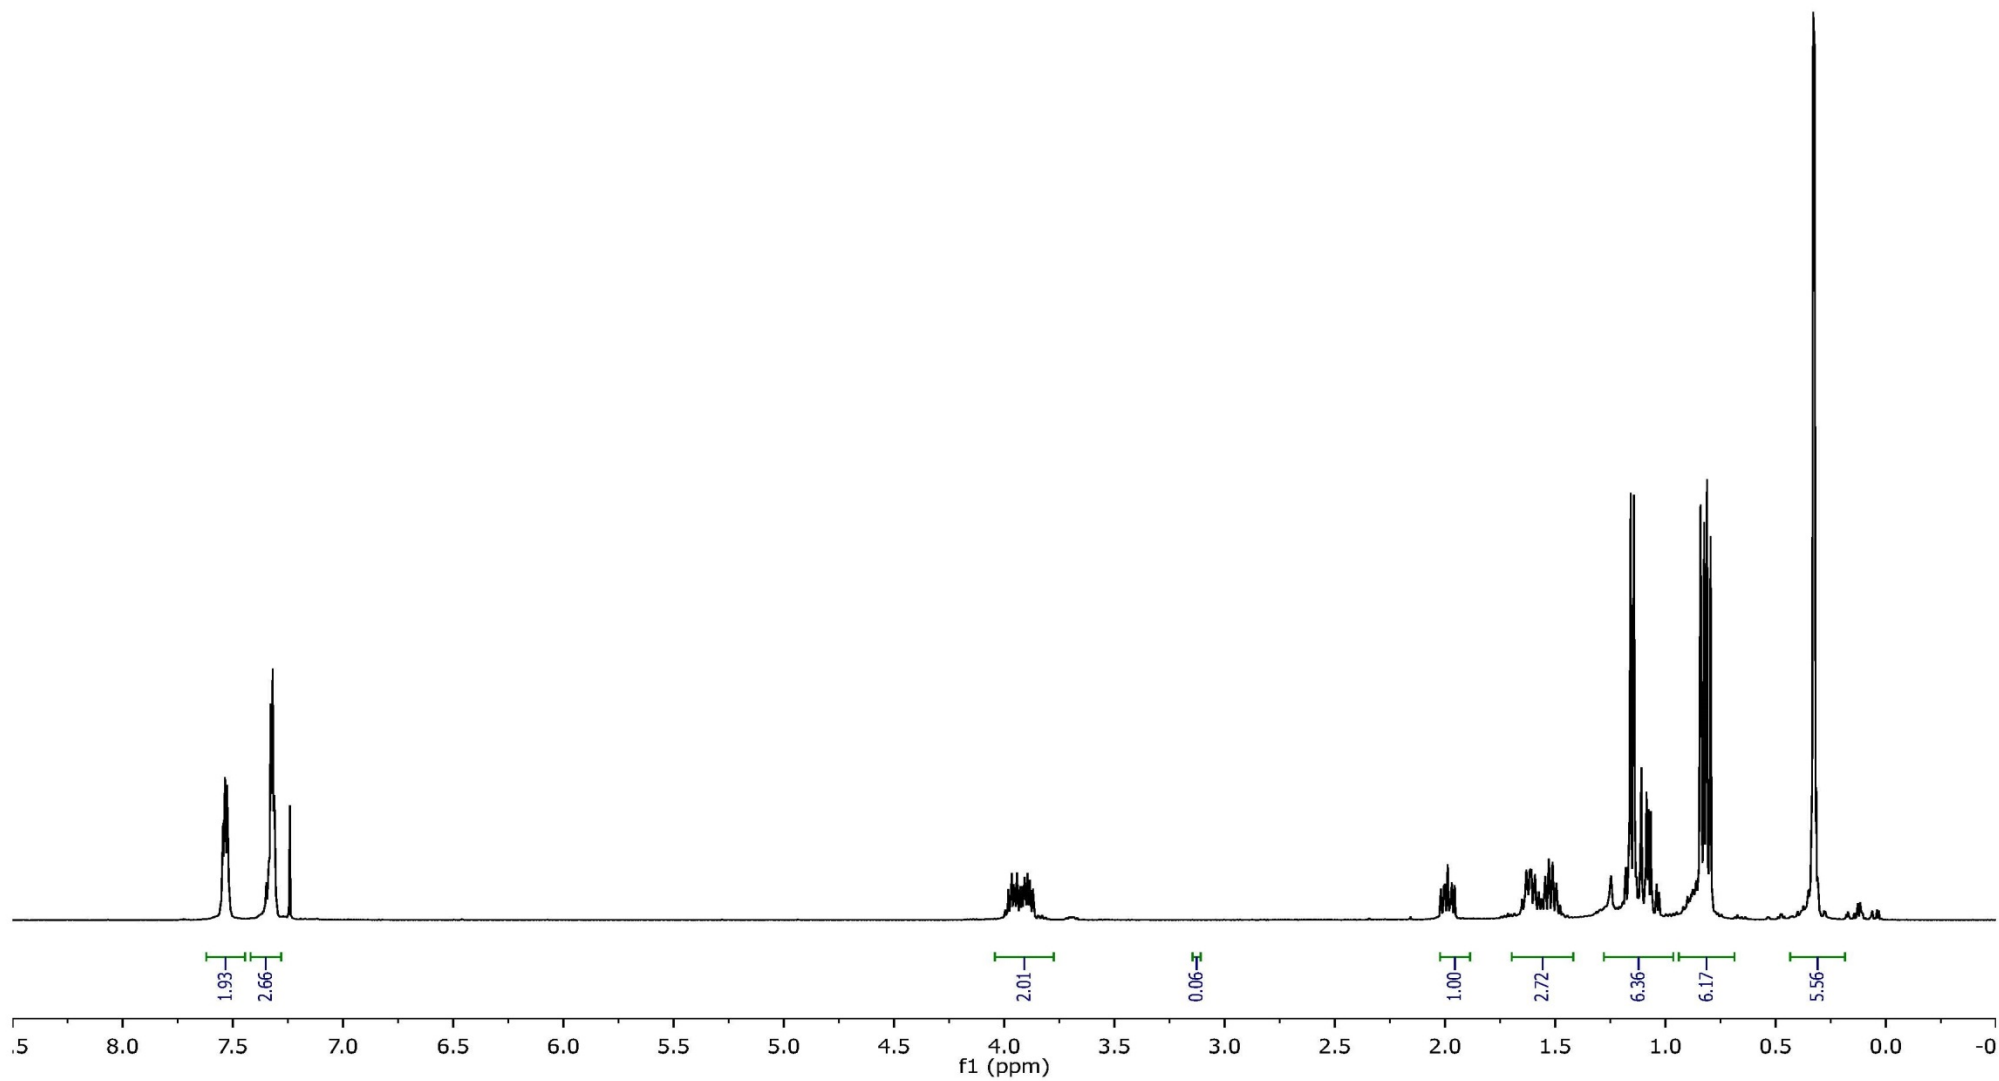

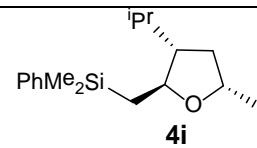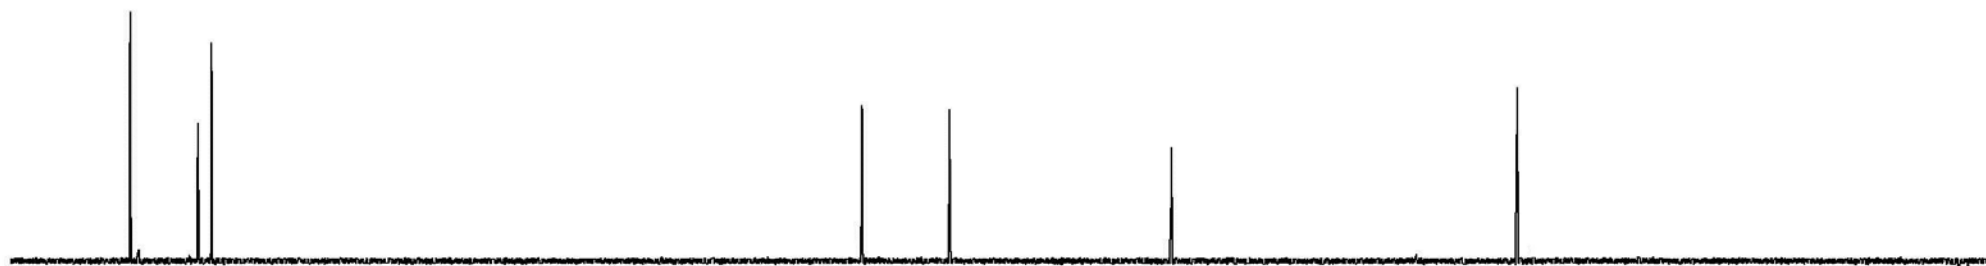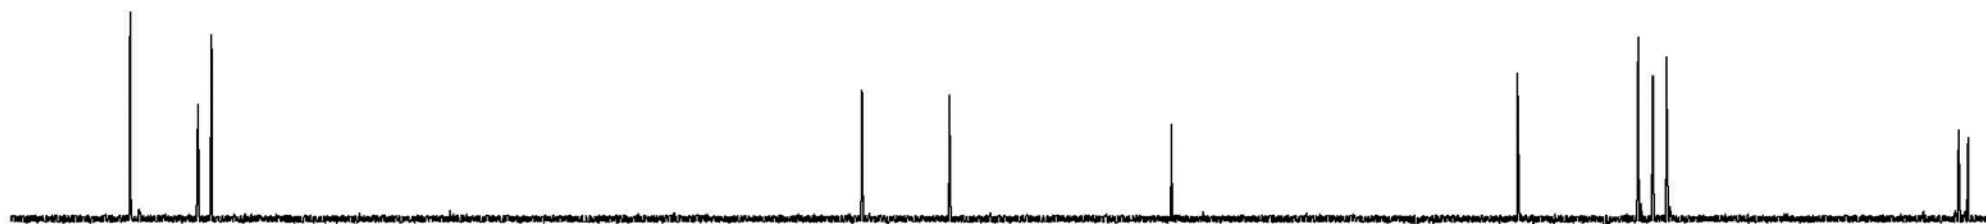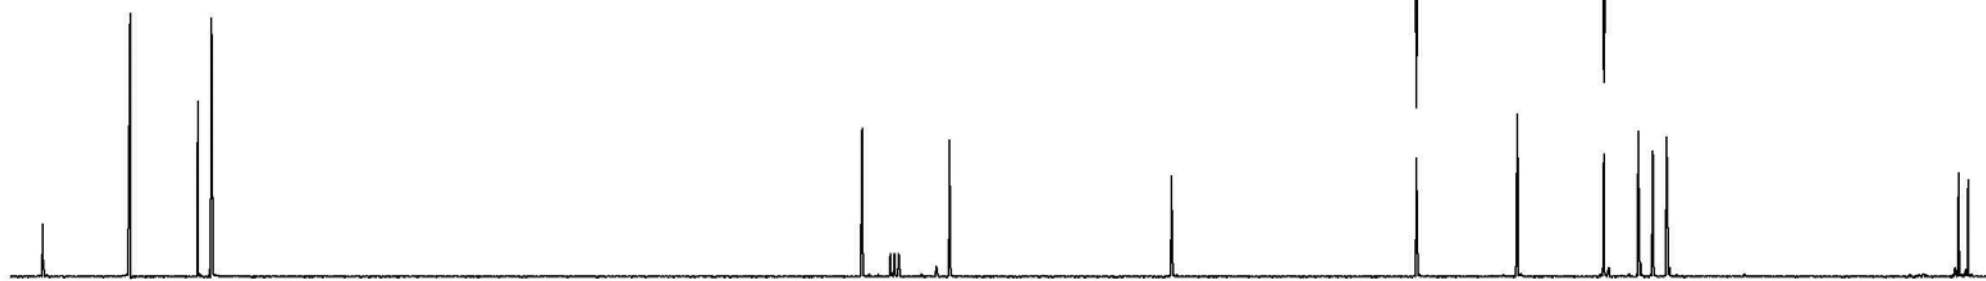

140 135 130 125 120 115 110 105 100 95 90 85 80 75 70 65 60 55 50 45 40 35 30 25 20 15 10 5 0  
f1 (ppm)

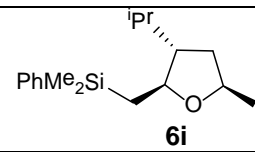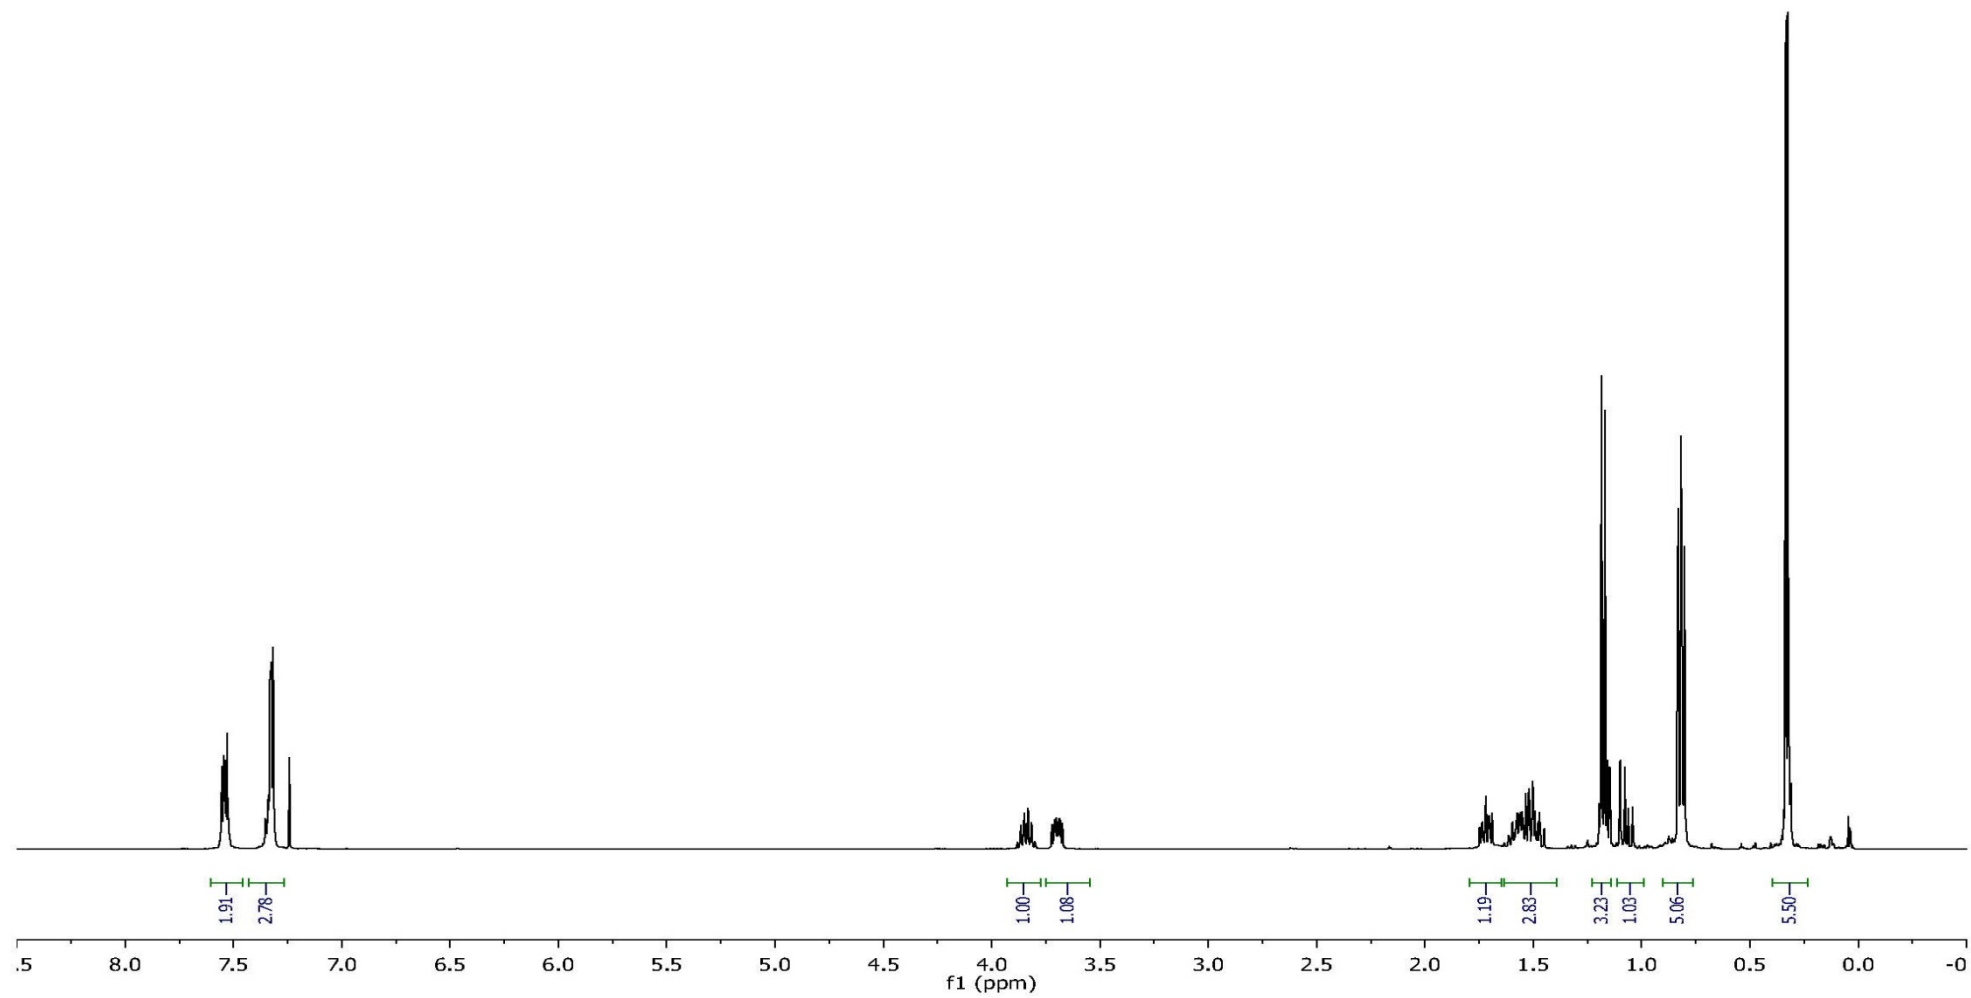

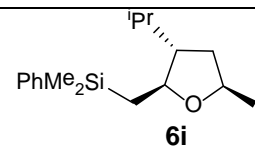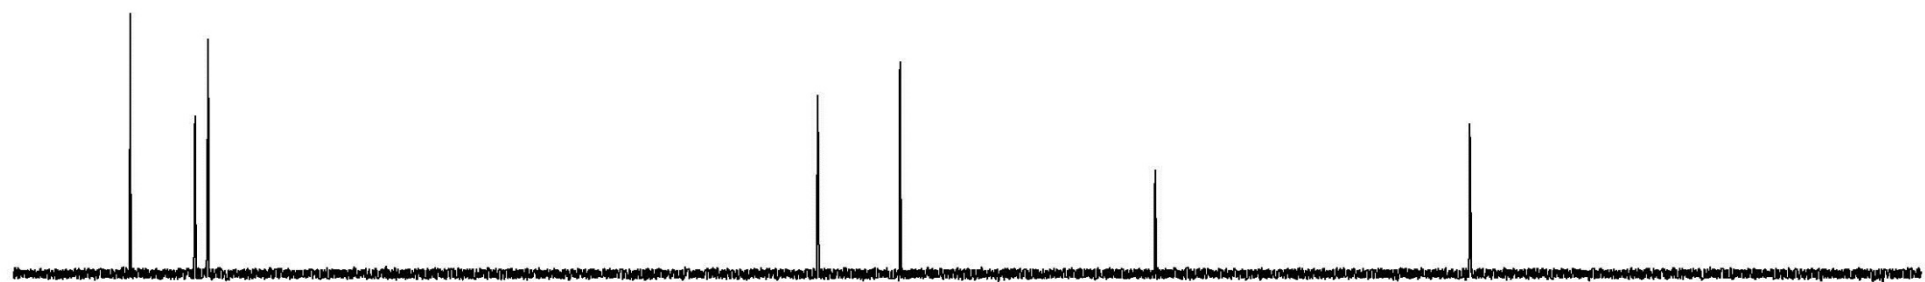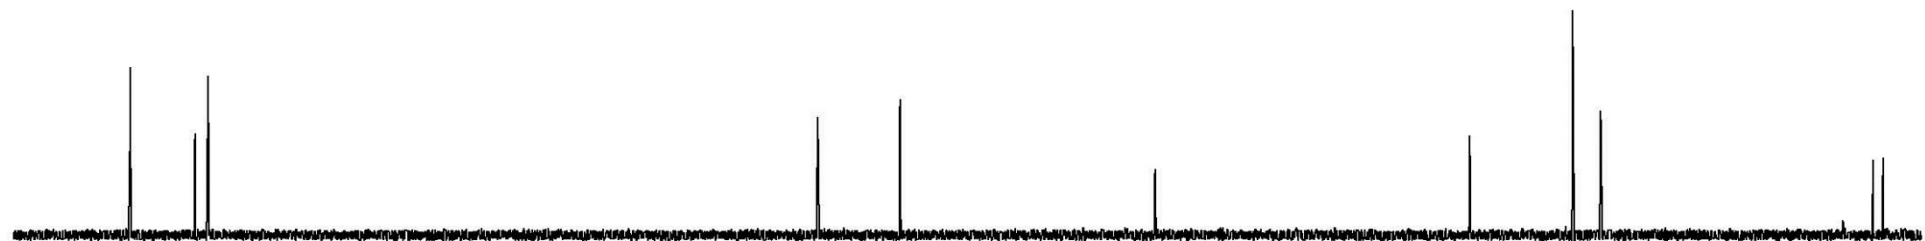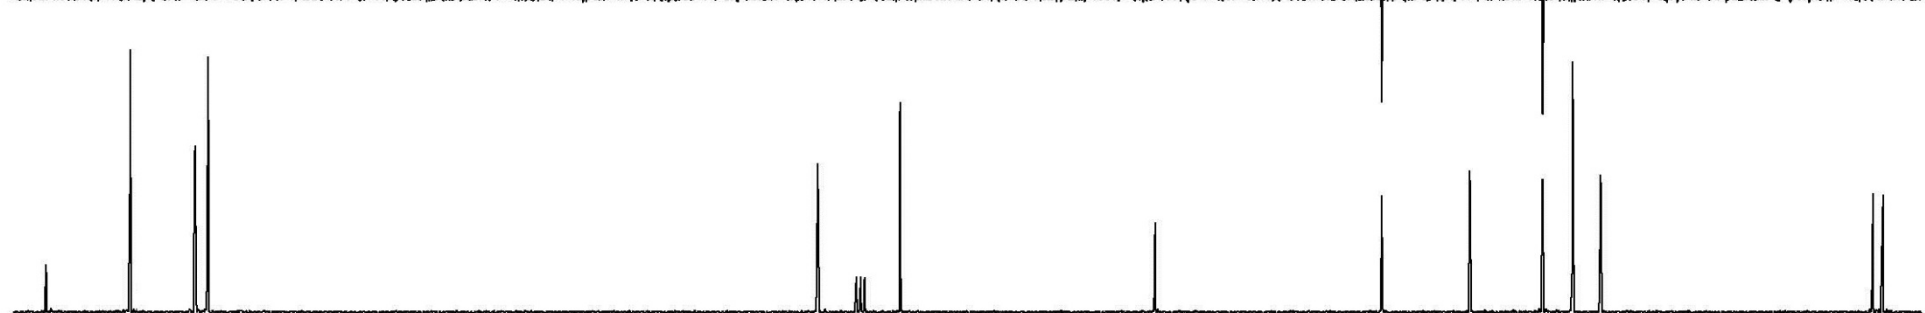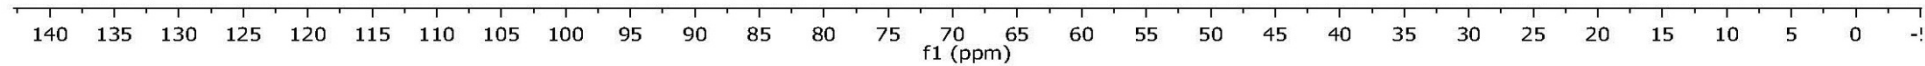



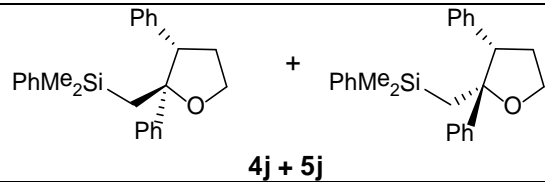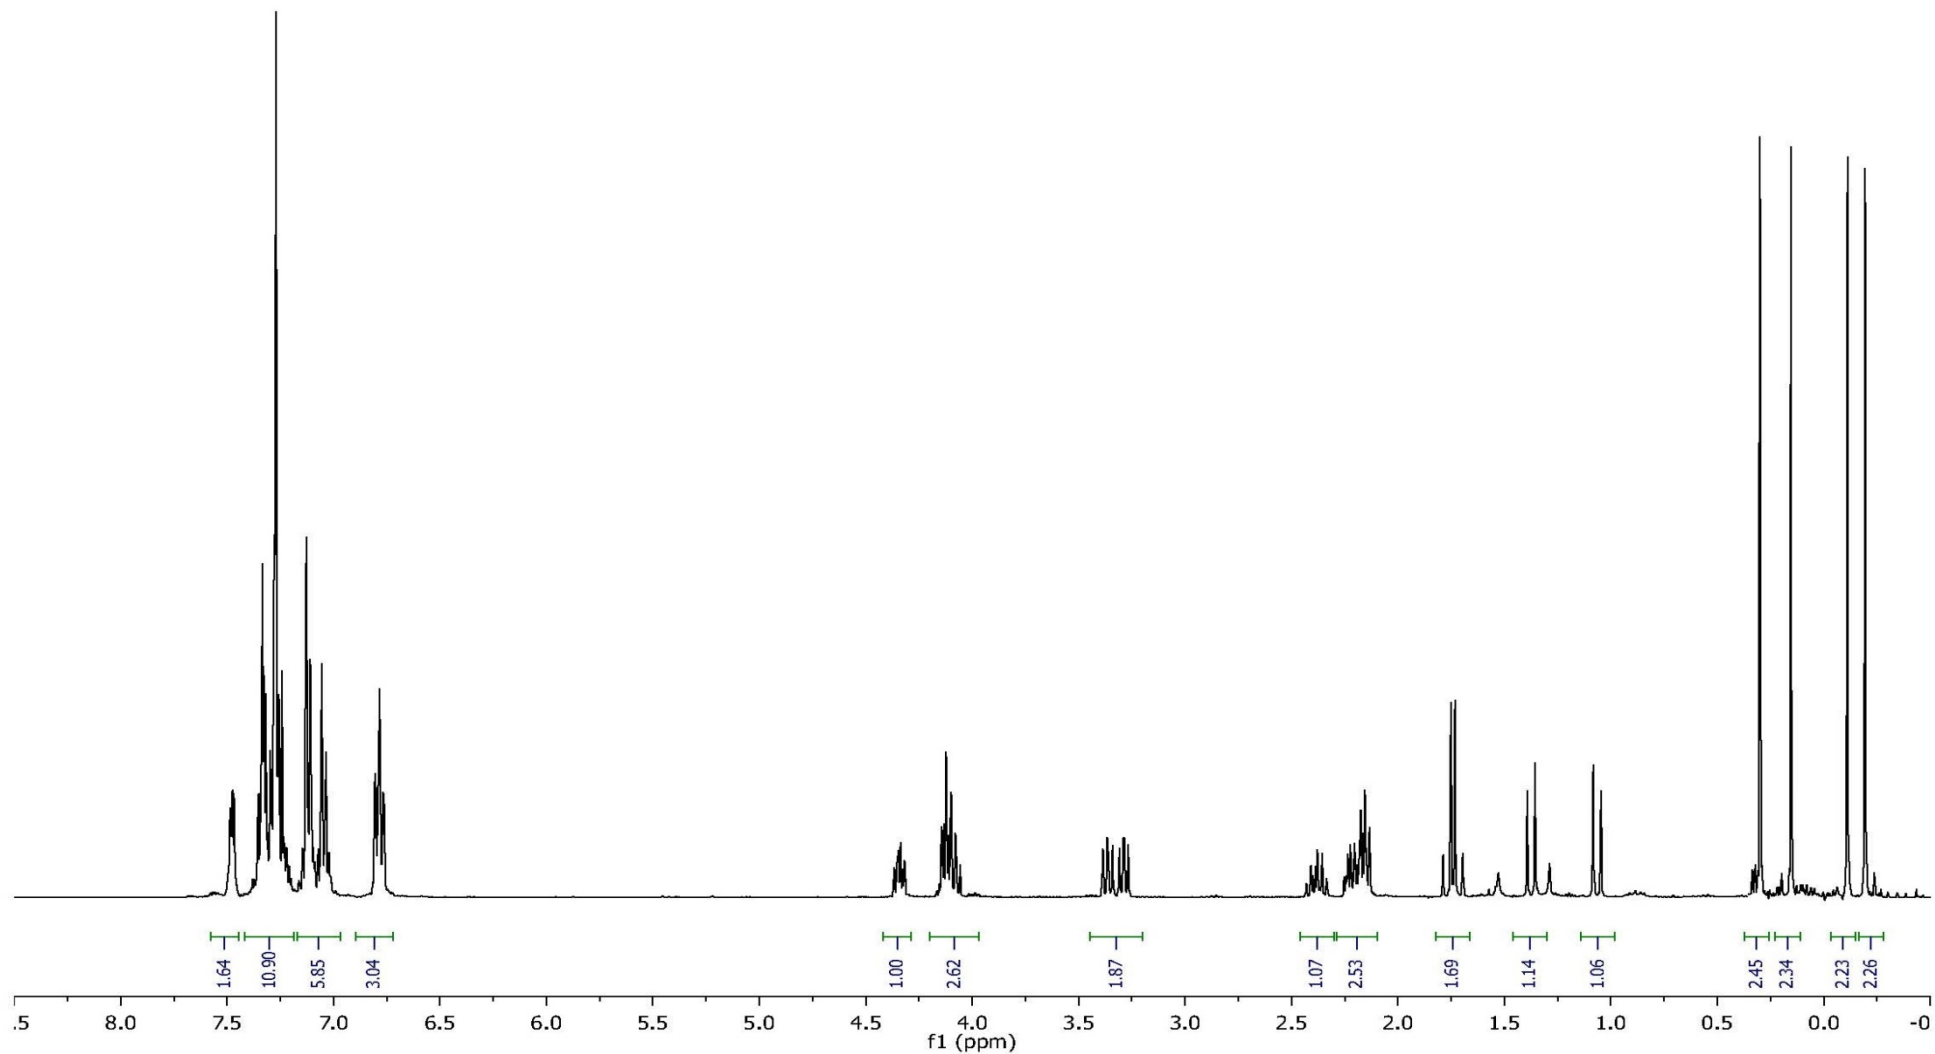

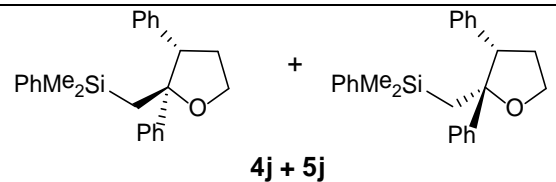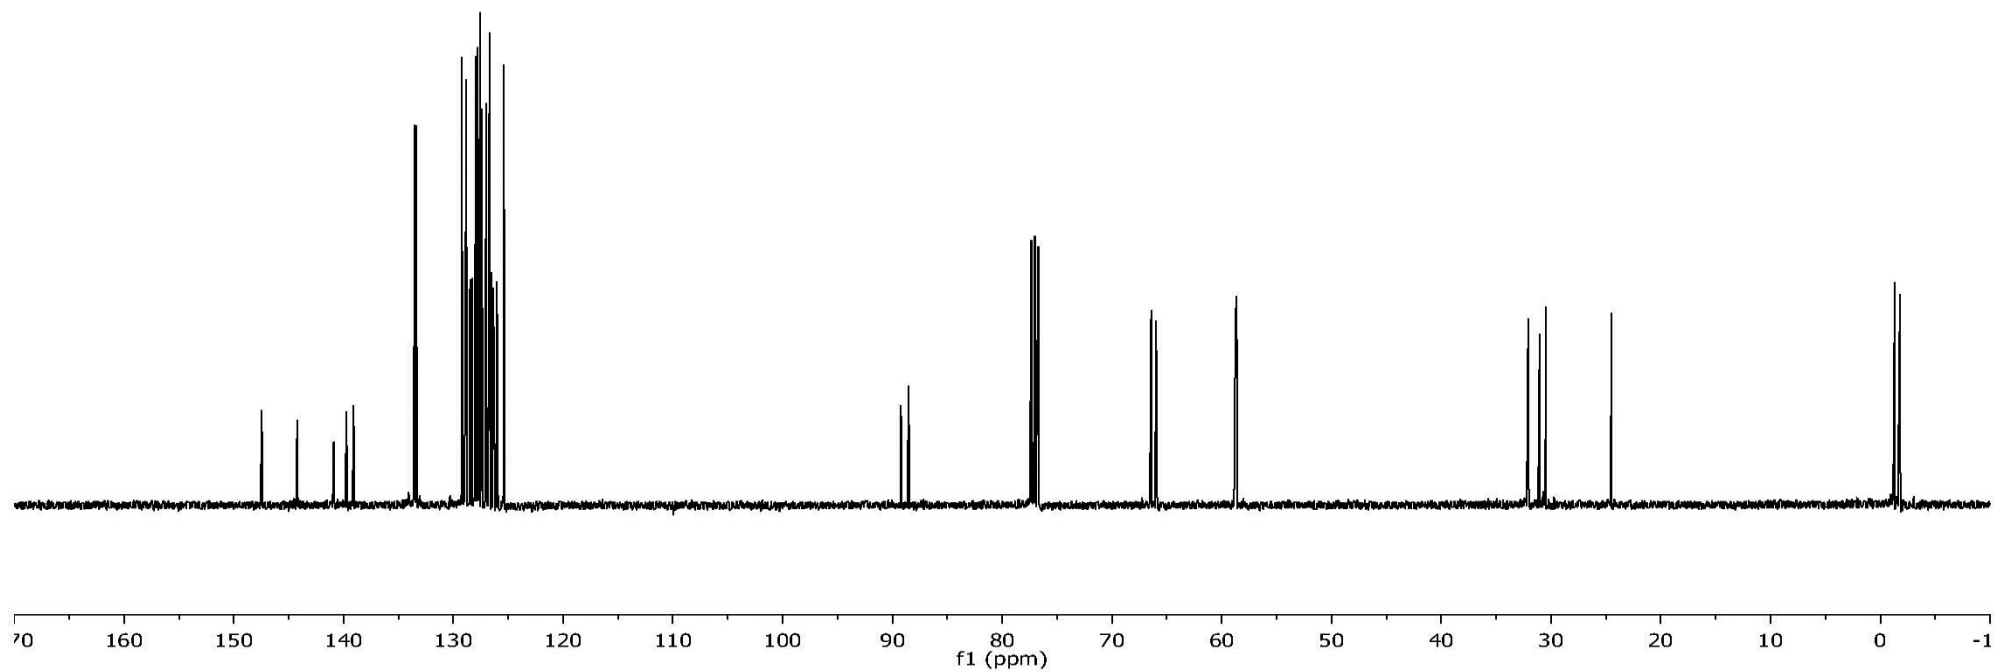



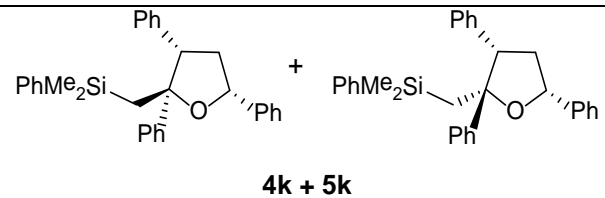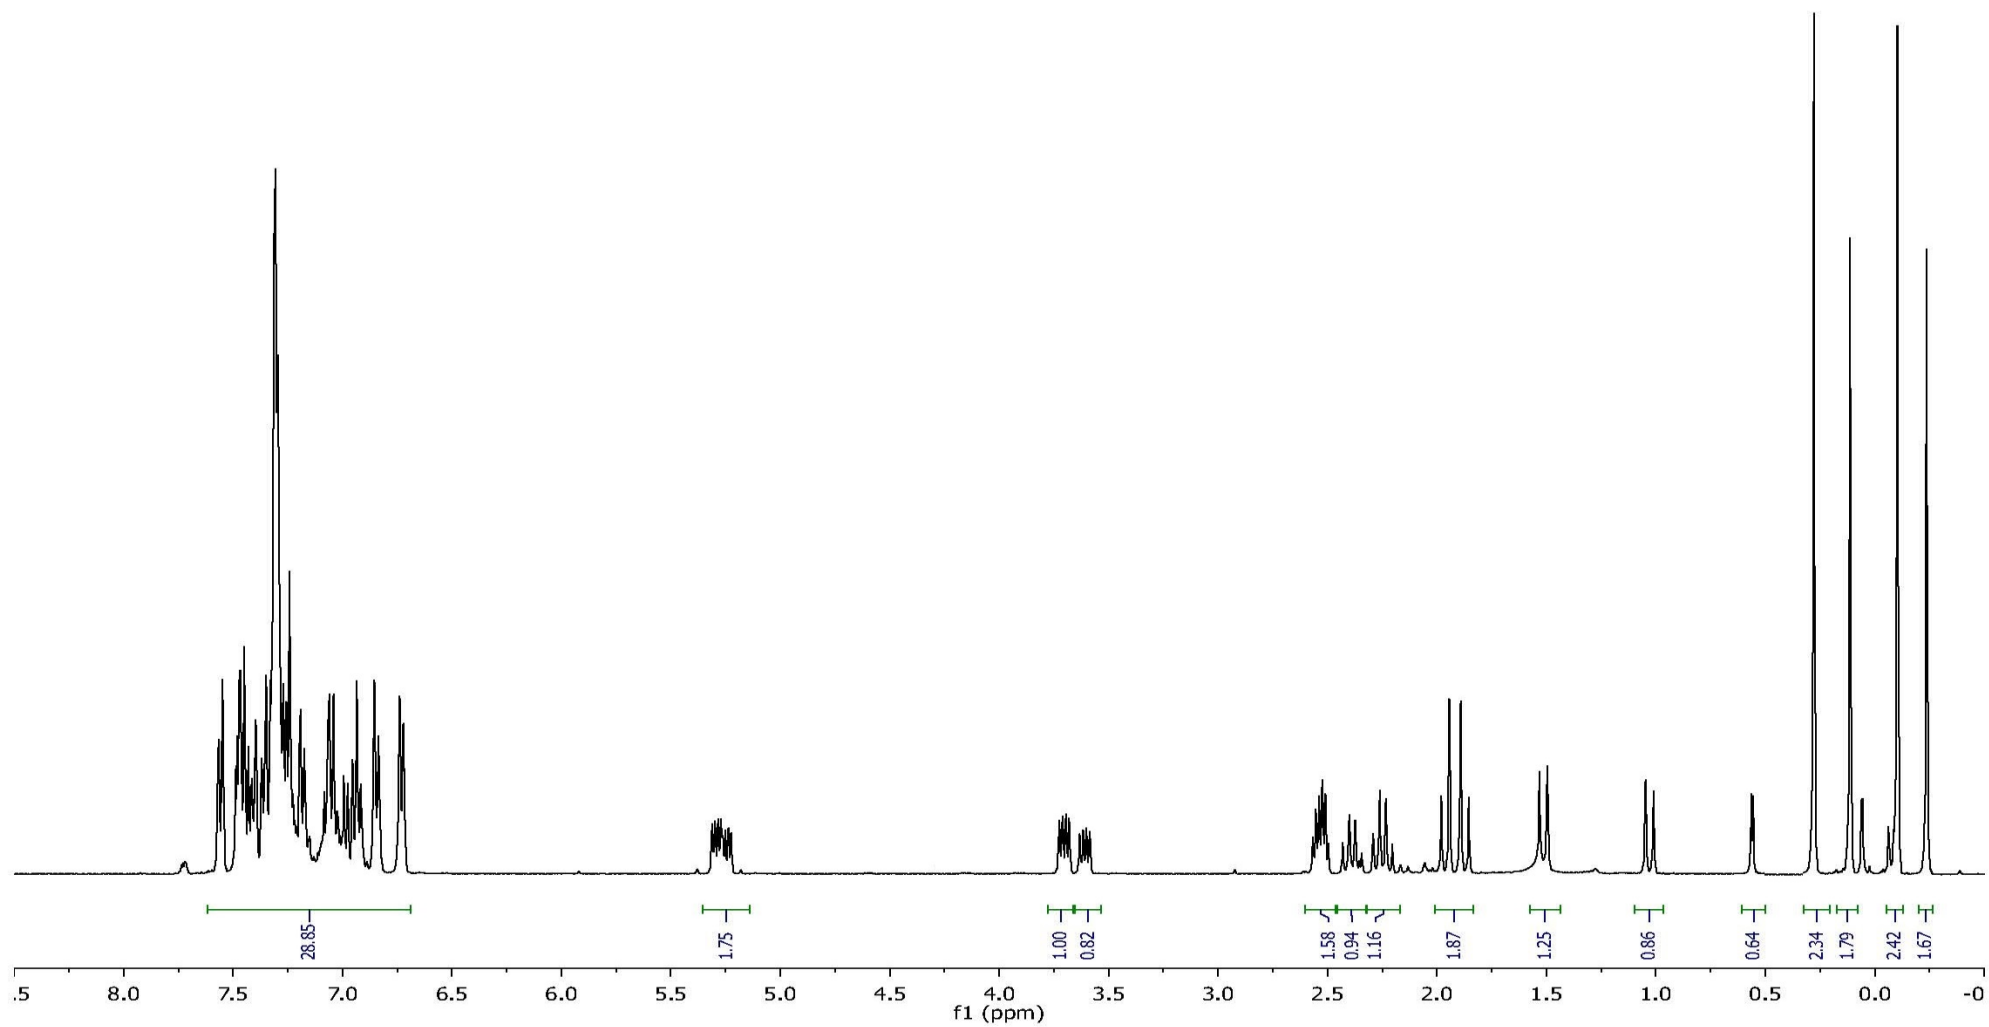

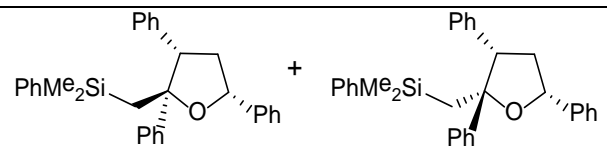

4k + 5k

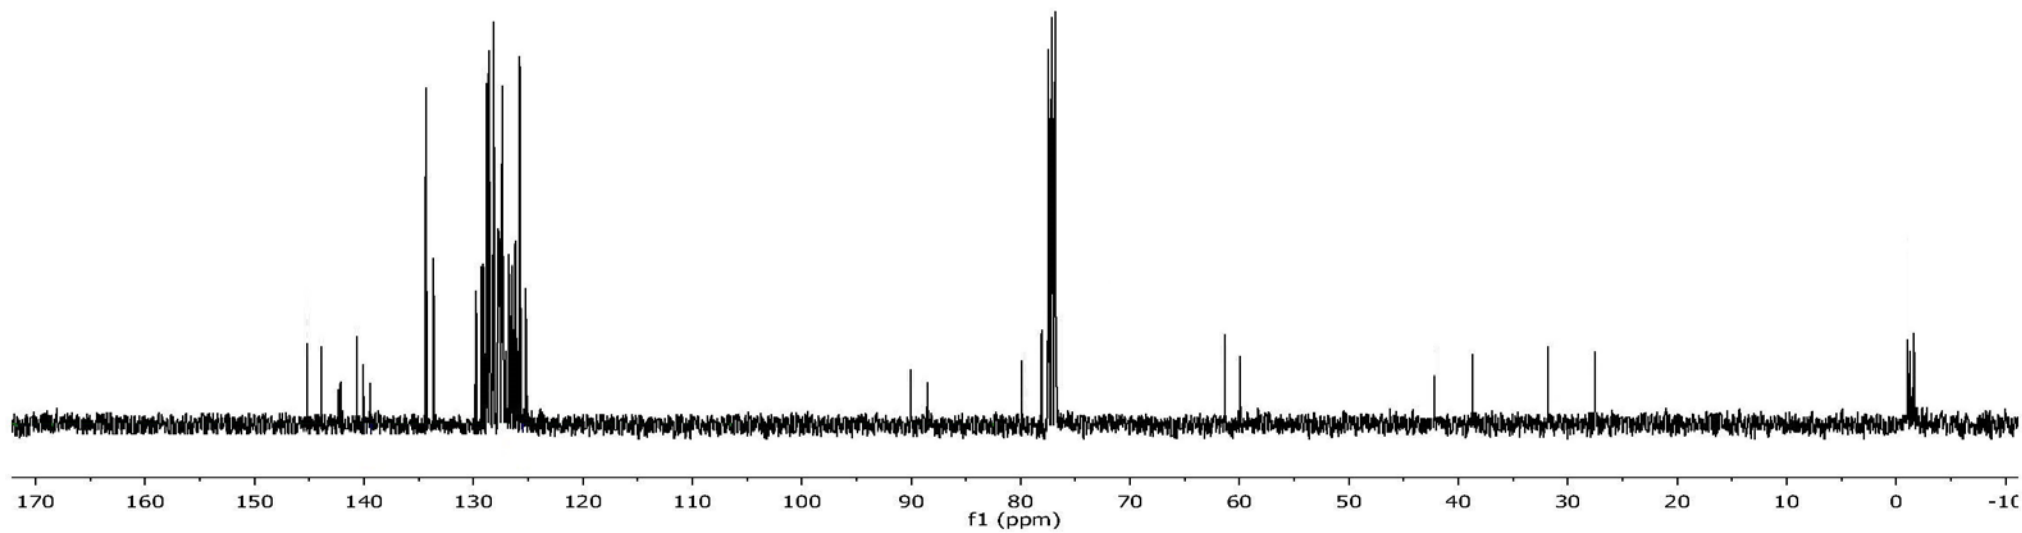

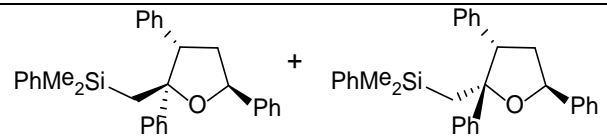

6k + 7k

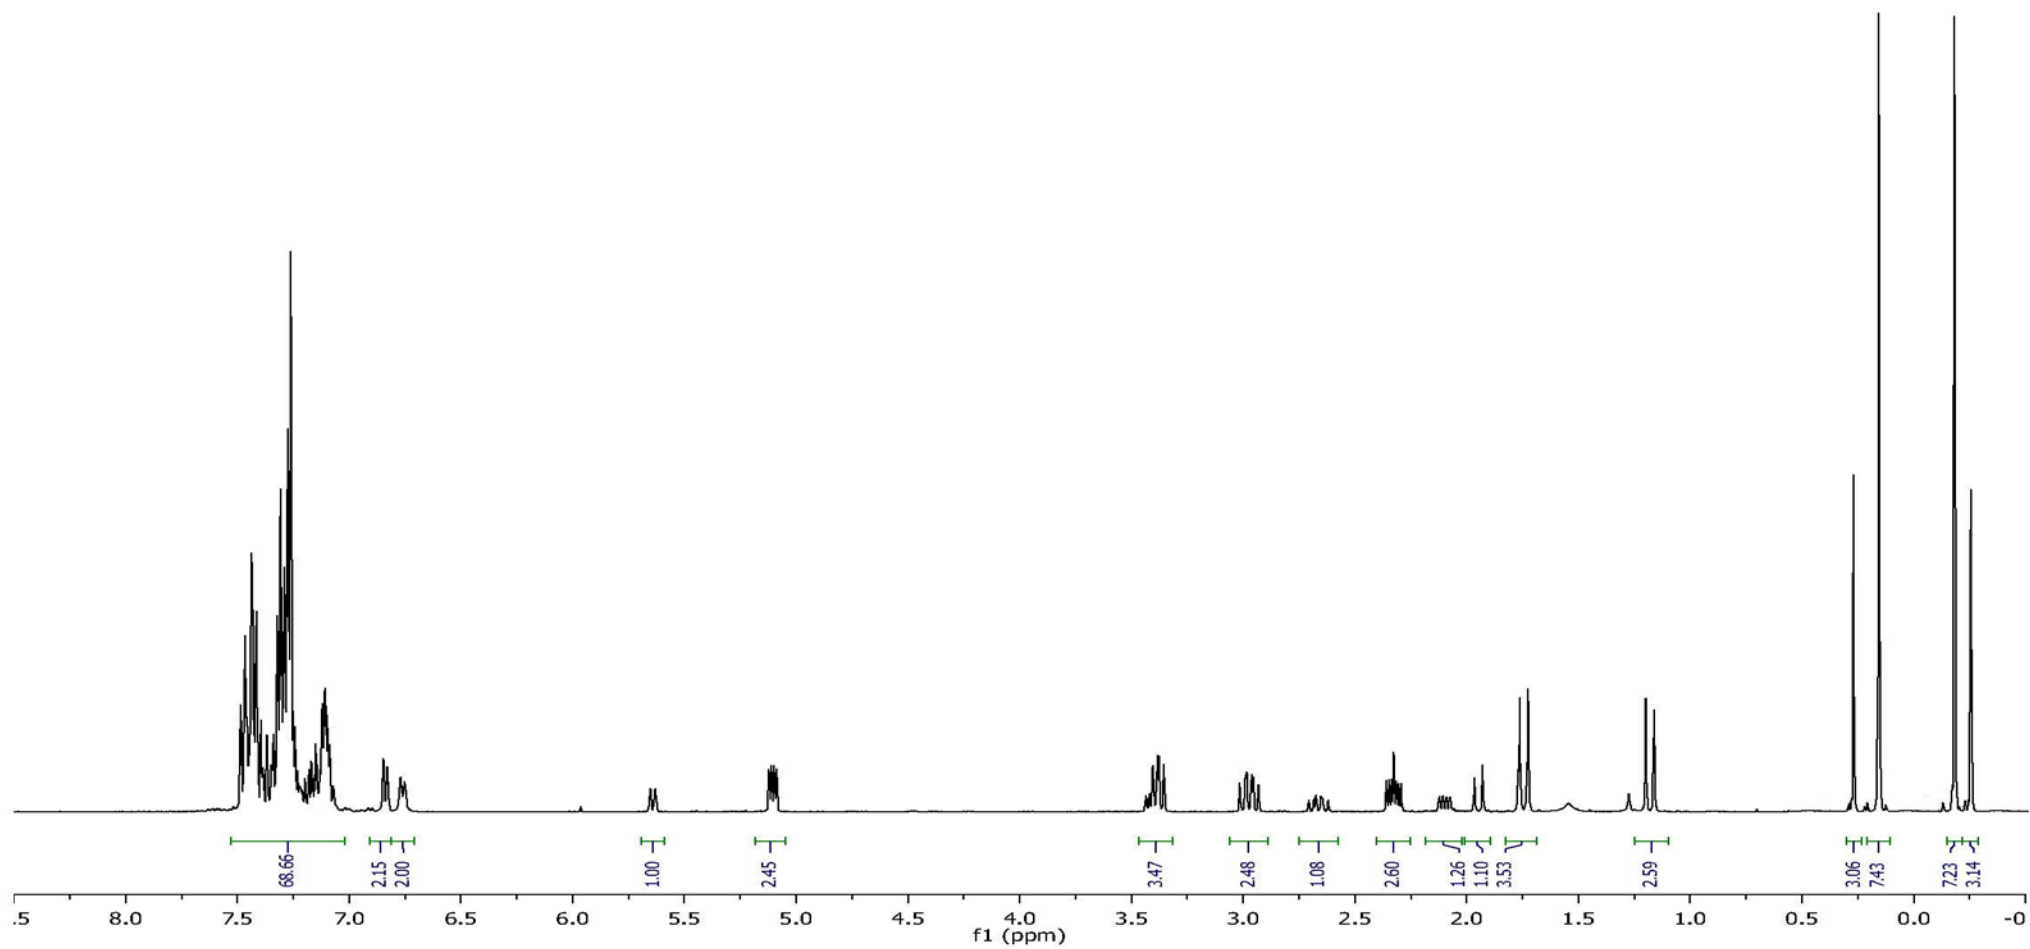

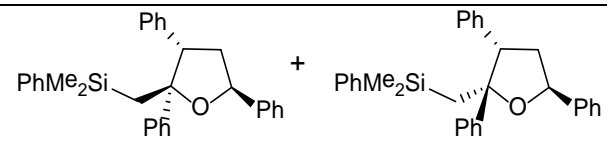

6k + 7k

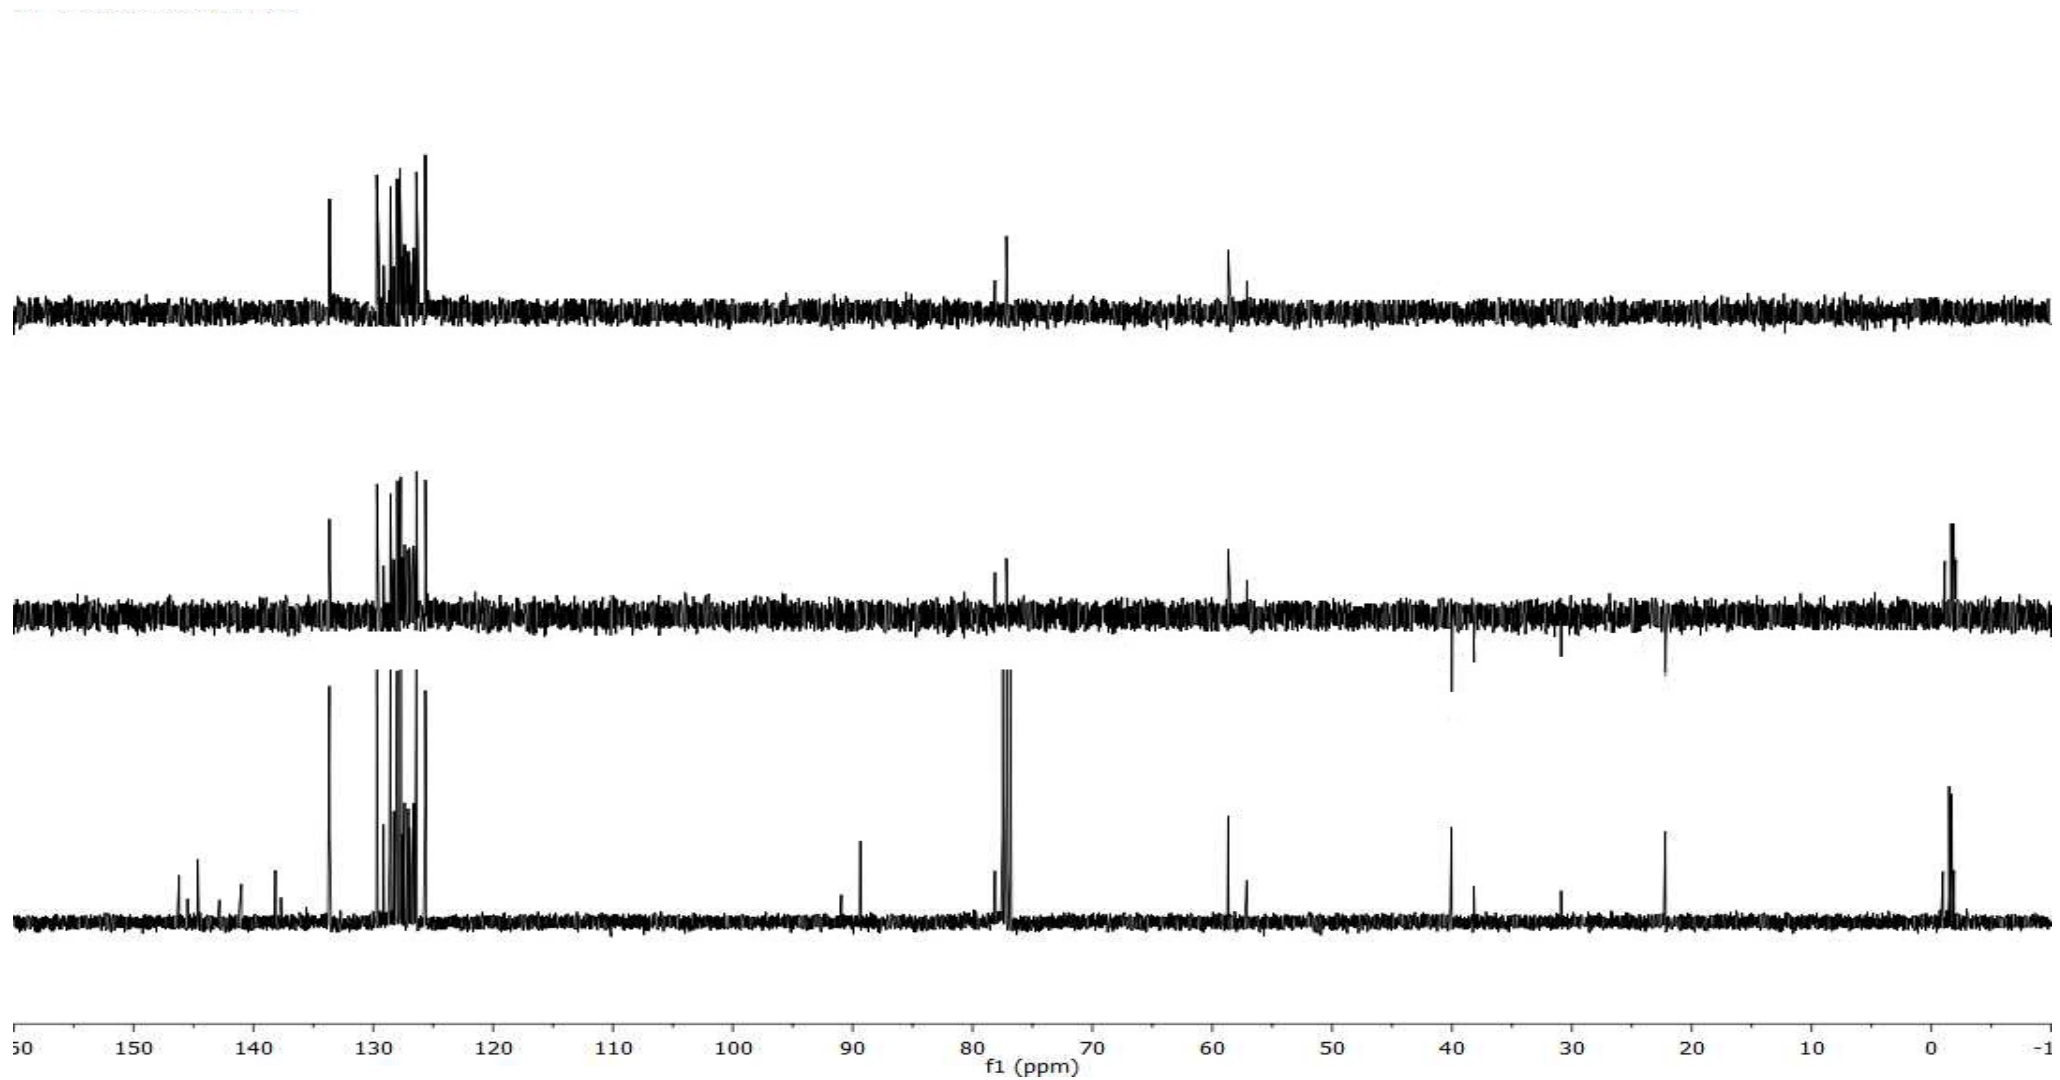

Supplement: c5ra06640a1.pdf [file c5ra06640a1.pdf]
